# Supplementary material for: Sae2/CtIP prevents R-loop accumulation in eukaryotic cells
Source: eLife. 2018 Dec 7;7:e42733. doi: 10.7554/eLife.42733 (PMC6296784; doi:10.7554/eLife.42733)
Supplement: Supplementary file 2. [file elife-42733-supp2.xlsx]

## Sheet: Sae2 ChIP
Peaks identified from Sae2 ChIP-seq in S phase with CPT treatment non-overlapping with peaks from bead control sample (no antibody):
chr	start	end	length	abs_summit	pileup	-LOG10(pvalue)	fold_enrichment	q value
chrI	230063	230218	156	230175	15	5.73092	3.404	2.55964
chrI	217186	217332	147	217288	3	4.49762	3.41295	1.55356
chrI	155052	155198	147	155083	3	4.24519	3.33328	1.36083
chrI	87707	87853	147	87765	3	3.57527	3.07686	0.99737
chrI	69205	69351	147	69246	2	2.66562	2.40015	0.61863
chrII	541370	541522	153	541437	5	7.66494	5.16478	4.27787
chrII	649215	649470	256	649341	5	7.52982	5.12586	4.1605
chrII	806334	806480	147	806387	4	5.64604	4.1666	2.48379
chrII	351256	351402	147	351327	3	5.1392	3.57906	2.05895
chrII	605289	605435	147	605338	3	4.90251	3.52344	1.86042
chrII	45163	45439	277	45295	4	4.80156	3.84607	1.78843
chrII	780250	780425	176	780328	5	4.41031	3.74987	1.49325
chrII	212661	212807	147	212775	3	4.32119	3.35819	1.42225
chrII	163512	163658	147	163596	4	4.21275	3.57133	1.36083
chrII	146878	147024	147	146980	3	4.24519	3.33328	1.36083
chrII	333454	333600	147	333525	3	4.24519	3.33328	1.36083
chrII	668626	668778	153	668715	3	3.57527	3.07686	0.99737
chrIII	57056	57270	215	57158	5	7.29974	5.056	3.95378
chrIII	59295	59465	171	59361	4	5.64604	4.1666	2.48379
chrIII	177607	177753	147	177675	4	5.64604	4.1666	2.48379
chrIII	275581	275727	147	275697	3	4.88424	3.51889	1.84657
chrIII	105401	105547	147	105481	5	4.84856	3.99987	1.81423
chrIII	121434	121580	147	121474	3	4.24519	3.33328	1.36083
chrIII	60522	60668	147	60583	3	4.22151	3.32535	1.36083
chrIII	226229	226375	147	226278	3	3.87545	3.2002	1.13562
chrIV	1412423	1412578	156	1412447	7	7.94279	5.71413	4.53274
chrIV	1307637	1307854	218	1307753	8	6.74312	4.99979	3.45237
chrIV	205619	205765	147	205721	6	5.9987	4.66652	2.78498
chrIV	1445834	1446014	181	1445940	5	5.3931	4.2856	2.27662
chrIV	1357377	1357523	147	1357514	3	5.20407	3.59324	2.11466
chrIV	836523	836669	147	836640	5	4.99665	4.0804	1.94144
chrIV	392145	392291	147	392178	3	4.93967	3.53259	1.89016
chrIV	678031	678178	148	678042	5	4.84856	3.99987	1.81423
chrIV	1278172	1278318	147	1278241	3	4.48334	3.40867	1.54188
chrIV	84920	85066	147	84964	3	4.24519	3.33328	1.36083
chrIV	220609	220755	147	220638	3	4.24519	3.33328	1.36083
chrIV	743603	743749	147	743650	3	4.24519	3.33328	1.36083
chrIV	698864	699010	147	698892	3	4.19753	3.31725	1.36083
chrIV	1453498	1453644	147	1453602	3	3.9757	3.23828	1.2077
chrIV	810688	810834	147	810736	3	3.91478	3.21532	1.1682
chrIV	392551	392799	249	392659	3	3.57527	3.07686	0.99737
chrIV	963922	964100	179	963989	2	3.4563	2.64945	0.97387
chrIV	1375676	1375822	147	1375714	2	3.32378	2.61549	0.90805
chrIV	419927	420073	147	419990	2	3.19304	2.57912	0.8454
chrIV	357300	357446	147	357395	2	2.93976	2.49996	0.71621
chrIV	680390	680536	147	680403	3	2.75641	2.66658	0.67622
chrIX	143101	143278	178	143133	4	5.91019	4.25019	2.70886
chrIX	1995	2313	319	2116	6	4.36225	3.68404	1.45746
chrIX	84443	84589	147	84489	3	3.9757	3.23828	1.2077
chrIX	298815	298961	147	298864	2	2.93976	2.49996	0.71621
chrIX	421379	421525	147	421483	2	2.93976	2.49996	0.71621
chrV	78721	78867	147	78810	4	5.74168	4.19774	2.56775
chrV	304198	304380	183	304342	4	5.64604	4.1666	2.48379
chrV	472891	473037	147	472941	4	5.29368	4.04304	2.19928
chrV	335530	335676	147	335586	6	5.05115	4.11749	1.99124
chrV	325153	325337	185	325224	4	4.80156	3.84607	1.78843
chrV	336654	336800	147	336701	4	4.80156	3.84607	1.78843
chrV	189154	189300	147	189184	3	4.16222	3.30516	1.36083
chrV	43867	44013	147	43939	2	3.06499	2.54059	0.7993
chrVI	75551	75707	157	75657	5	7.38095	5.08118	4.02489
chrVI	178830	178976	147	178937	3	3.87545	3.2002	1.13562
chrVII	78989	79145	157	79028	5	7.57405	5.13876	4.19968
chrVII	599102	599250	149	599128	4	5.30668	4.04785	2.20607
chrVII	1049102	1049248	147	1049167	5	4.84856	3.99987	1.81423
chrVII	159257	159403	147	159291	3	4.45516	3.40016	1.51789
chrVII	419905	420073	169	420011	3	4.32119	3.35819	1.42225
chrVII	453372	453518	147	453434	3	4.28308	3.3458	1.39452
chrVII	328504	328650	147	328599	3	4.24519	3.33328	1.36083
chrVII	385716	385862	147	385844	3	4.24519	3.33328	1.36083
chrVII	843994	844140	147	844121	3	4.19753	3.31725	1.36083
chrVII	57111	57257	147	57194	3	3.9757	3.23828	1.2077
chrVII	806508	806654	147	806539	2	2.93976	2.49996	0.71621
chrVIII	451621	451810	190	451734	7	7.94279	5.71413	4.53274
chrVIII	444715	444863	149	444793	4	6.76944	4.47383	3.46917
chrVIII	409077	409223	147	409154	3	5.46626	3.64621	2.33914
chrVIII	244364	244510	147	244433	3	5.1392	3.57906	2.05895
chrVIII	386208	386412	205	386351	4	4.80156	3.84607	1.78843
chrVIII	144061	144207	147	144123	3	4.54122	3.42584	1.58946
chrVIII	383887	384033	147	383942	3	4.44125	3.39591	1.51789
chrVIII	21356	21502	147	21442	3	4.24519	3.33328	1.36083
chrVIII	128842	128988	147	128910	3	3.57527	3.07686	0.99737
chrVIII	141029	141175	147	141078	2	2.81923	2.45797	0.71621
chrX	639902	640057	156	640029	9	9.0142	6.24978	5.54141
chrX	1659	1805	147	1714	7	5.95746	4.61077	2.75328
chrX	702214	702366	153	702251	4	5.58605	4.14656	2.4448
chrX	515855	516001	147	515951	3	5.57283	3.66586	2.43274
chrX	74288	74498	211	74388	5	4.84856	3.99987	1.81423
chrX	71260	71406	147	71357	3	4.84829	3.50981	1.81423
chrX	162973	163119	147	163078	3	4.46919	3.40441	1.52991
chrX	290454	290600	147	290578	4	4.21275	3.57133	1.36083
chrX	292986	293132	147	293108	4	4.21275	3.57133	1.36083
chrX	409689	409835	147	409734	3	4.24519	3.33328	1.36083
chrX	621168	621419	252	621307	3	4.23363	3.32942	1.36083
chrX	279932	280078	147	280033	3	4.08274	3.27729	1.29265
chrX	171608	171754	147	171633	2	3.66993	2.6985	1.03554
chrXI	326528	326954	427	326649	7	9.96562	6.56248	6.43746
chrXI	519551	519799	249	519661	8	7.22624	5.29391	3.8894
chrXI	92874	93020	147	92953	4	5.18032	4.00024	2.09376
chrXI	25857	26003	147	25916	3	5.03643	3.55568	1.97834
chrXI	464577	464723	147	464670	4	4.30521	3.61733	1.41396
chrXI	282588	282734	147	282601	3	4.28308	3.3458	1.39452
chrXI	639017	639163	147	639080	3	4.24519	3.33328	1.36083
chrXI	512163	512309	147	512237	3	4.19753	3.31725	1.36083
chrXI	571640	571786	147	571723	3	4.08274	3.27729	1.29265
chrXI	524393	524539	147	524429	3	3.57527	3.07686	0.99737
chrXI	558764	559021	258	558893	3	3.57527	3.07686	0.99737
chrXI	394095	394241	147	394163	2	2.93976	2.49996	0.71621
chrXII	489984	490310	327	490092	33	7.05829	2.67693	3.74084
chrXII	871239	871385	147	871284	5	6.56331	4.80029	3.29744
chrXII	233746	233951	206	233851	6	5.48213	4.37484	2.3499
chrXII	524167	524313	147	524268	3	5.1392	3.57906	2.05895
chrXII	287171	287340	170	287216	3	5.09732	3.56967	2.03066
chrXII	258926	259072	147	259056	3	5.07677	3.56499	2.01227
chrXII	242974	243148	175	243049	3	4.93967	3.53259	1.89016
chrXII	876700	876888	189	876790	4	4.80156	3.84607	1.78843
chrXII	636980	637126	147	637004	3	4.76173	3.48732	1.77745
chrXII	201999	202145	147	202044	3	4.45516	3.40016	1.51789
chrXII	408450	408596	147	408571	3	4.08274	3.27729	1.29265
chrXII	199012	199238	227	199092	5	4.04541	3.52927	1.26709
chrXII	884669	884815	147	884747	2	3.605	2.6843	0.99737
chrXIII	809818	809964	147	809889	4	5.64604	4.1666	2.48379
chrXIII	639784	639930	147	639868	3	5.39056	3.63161	2.27662
chrXIII	19834	19980	147	19938	3	4.19753	3.31725	1.36083
chrXIII	667455	667601	147	667527	3	3.57527	3.07686	0.99737
chrXIII	499577	499723	147	499610	2	3.26259	2.59883	0.88498
chrXIII	775352	775498	147	775457	2	2.90438	2.48793	0.71621
chrXIII	59483	59629	147	59546	1	2.67899	1.8759	0.62974
chrXIV	394035	394193	159	394066	5	6.10574	4.61528	2.87413
chrXIV	663044	663325	282	663244	5	6.10574	4.61528	2.87413
chrXIV	65807	66016	210	65916	4	6.09384	4.30398	2.86803
chrXIV	667332	667478	147	667401	4	5.64604	4.1666	2.48379
chrXIV	90435	90581	147	90532	3	4.6321	3.45192	1.66215
chrXIV	695748	695894	147	695835	3	4.45516	3.40016	1.51789
chrXIV	147259	147454	196	147310	3	4.24519	3.33328	1.36083
chrXIV	316911	317057	147	316979	3	4.24519	3.33328	1.36083
chrXIV	690304	690450	147	690413	3	3.90486	3.21153	1.15966
chrXIV	750368	750514	147	750389	2	3.75621	2.71646	1.07904
chrXIV	62095	62265	171	62176	3	3.57527	3.07686	0.99737
chrXIV	19166	19312	147	19268	2	3.49904	2.65981	0.99523
chrXIV	704085	704254	170	704157	4	3.40378	3.12489	0.96158
chrXIV	265295	265441	147	265375	2	3.32378	2.61549	0.90805
chrXIV	511763	511909	147	511822	2	2.93976	2.49996	0.71621
chrXV	722525	722799	275	722680	15	16.4616	9.62949	12.5207
chrXV	160066	160448	383	160139	8	7.59868	5.51416	4.22312
chrXV	1028226	1028372	147	1028291	4	6.79623	4.47972	3.49438
chrXV	159733	159928	196	159815	6	6.77097	5.06426	3.4704
chrXV	758947	759138	192	759015	4	5.77429	4.20812	2.5901
chrXV	1	153	153	76	17	5.26574	2.99976	2.1729
chrXV	31338	31484	147	31378	5	5.15397	4.16365	2.07325
chrXV	561890	562036	147	562007	3	5.1392	3.57906	2.05895
chrXV	850794	850940	147	850877	3	5.01662	3.55104	1.95967
chrXV	424299	424500	202	424368	5	4.84856	3.99987	1.81423
chrXV	890753	890899	147	890807	3	4.60124	3.44318	1.63405
chrXV	81642	81788	147	81720	3	4.24519	3.33328	1.36083
chrXV	270892	271038	147	271024	3	4.24519	3.33328	1.36083
chrXV	679929	680075	147	680020	3	4.24519	3.33328	1.36083
chrXV	428428	428574	147	428494	3	4.19753	3.31725	1.36083
chrXV	257711	257857	147	257762	2	3.34915	2.62221	0.92895
chrXV	677246	677392	147	677313	2	3.2867	2.60547	0.90175
chrXV	533274	533420	147	533348	2	2.90438	2.48793	0.71621
chrXVI	109556	109702	147	109617	4	5.72557	4.19256	2.55483
chrXVI	336137	336283	147	336174	4	4.80156	3.84607	1.78843
chrXVI	453521	453667	147	453595	4	4.80156	3.84607	1.78843
chrXVI	701777	701923	147	701803	5	4.41031	3.74987	1.49325
chrXVI	832901	833047	147	833008	3	3.99654	3.24601	1.22564
chrXVI	544891	545037	147	545001	2	3.63703	2.69138	1.01592
chrXVI	414532	414678	147	414597	2	2.93976	2.49996	0.71621
rDNA (excluded from txn analysis)
chrXII	453699	453994	296	453849	78	28.848	4.67414	24.5067
chrXII	462840	463122	283	462991	78	28.335	4.59261	24.0091
chrXII	454308	454709	402	454528	76	21.9154	3.71947	17.7538
chrXII	463444	463801	358	463664	69	18.2177	3.43106	14.1833
chrXII	461919	462491	573	462280	60	17.7007	3.69664	13.6845
chrXII	452782	453359	578	453188	57	17.4505	3.79051	13.4466
chrXII	456016	456546	531	456263	56	13.8077	3.18407	10.0346
chrXII	465185	465695	511	465341	56	13.8077	3.18407	10.0346
chrXII	455329	455534	206	455436	41	12.9067	3.70291	9.21506
chrXII	460105	460281	177	460212	42	10.791	3.16149	7.20396
chrXII	464458	464652	195	464573	37	10.0228	3.22606	6.49181
chrXII	459605	459764	160	459667	37	9.24212	3.03657	5.75783
chrXII	460970	461444	475	461122	44	9.23672	2.76049	5.7533
chrXII	457095	457284	190	457207	37	8.38872	2.83557	4.95837
chrXII	468737	468888	152	468772	33	8.25561	2.9822	4.83165
chrXII	451829	452128	300	451990	41	7.39586	2.48498	4.0372
chrXII	466252	466453	202	466417	36	5.42109	2.20218	2.30043

## Sheet: Top 10% txn
Locations of top 10% of transcribed genes in S. cerevisiae; from Miura et al. 2008, Nagalakshmi et al. 2008, Pelechano et al. 2010)
chr	start	end	direction	gene
chrI	139503	141431	-	YAL005C
chrI	140760	141407	+	YAL004W
chrI	142174	143160	+	YAL003W
chrII	45645	46370	+	YBL092W
chrII	46565	47180	-	YBL091C-A
chrII	59822	60739	-	YBL087C
chrII	88523	89440	-	YBL072C
chrII	111437	112708	+	YBL058W
chrII	141247	141972	+	YBL041W
chrII	168423	169376	+	YBL027W
chrII	235394	235792	-	YBL003C
chrII	236492	236887	+	YBL002W
chrII	255373	255684	-	YBR009C
chrII	256331	256741	+	YBR010W
chrII	332831	333812	+	YBR048W
chrII	372103	372735	-	YBR067C
chrII	373861	375690	-	YBR068C
chrII	393123	394742	+	YBR078W
chrII	406628	407169	-	YBR082C
chrII	414186	415261	-	YBR084C-A
chrII	426333	427058	-	YBR090C
chrII	427698	429101	-	YBR092C
chrII	443821	444693	-	YBR101C
chrII	452658	453224	+	YBR106W
chrII	462870	465770	-	YBR112C
chrII	481364	483367	-	YBR121C
chrII	548362	549009	-	YBR154C
chrII	556549	558198	+	YBR158W
chrII	581726	582172	-	YBR173C
chrII	606270	607140	+	YBR191W
chrII	612236	613900	-	YBR196C
chrII	735720	736040	-	YBR262C
chrII	739841	741022	+	YBR267W
chrII	774700	776313	+	YBR286W
chrIII	46640	46963	+	YCL046W
chrIII	48653	50221	-	YCL043C
chrIII	57374	58678	-	YCL037C
chrIII	120946	122328	-	YCR005C
chrIII	137746	138996	+	YCR012W
chrIII	228318	228791	+	YCR063W
chrIII	265068	266846	+	YCR088W
chrIV	87512	87982	+	YDL208W
chrIV	116321	116866	+	YDL192W
chrIV	117664	118517	+	YDL191W
chrIV	133437	134723	+	YDL182W
chrIV	190924	192261	+	YDL147W
chrIV	217600	218367	+	YDL136W
chrIV	229906	230527	+	YDL130W
chrIV	236157	238664	-	YDL126C
chrIV	239019	239606	-	YDL125C
chrIV	285391	286695	-	YDL097C
chrIV	306926	307789	-	YDL083C
chrIV	308424	309388	+	YDL082W
chrIV	309802	310122	-	YDL081C
chrIV	322226	322988	+	YDL075W
chrIV	331024	332940	+	YDL070W
chrIV	355674	356759	-	YDL055C
chrIV	369771	370706	+	YDL047W
chrIV	384601	385587	-	YDL037C
chrIV	392659	393912	-	YDL033C
chrIV	411761	412081	-	YDL023C
chrIV	411825	413000	+	YDL022W
chrIV	415113	416708	-	YDL020C
chrIV	446967	447578	-	YDL002C
chrIV	453045	453650	+	YDR002W
chrIV	491515	492324	+	YDR025W
chrIV	508147	509109	+	YDR033W
chrIV	525440	527215	+	YDR037W
chrIV	551860	552948	+	YDR047W
chrIV	555726	556472	-	YDR050C
chrIV	579458	580452	+	YDR064W
chrIV	600793	601809	+	YDR077W
chrIV	720962	721297	-	YDR133C
chrIV	766736	767971	-	YDR153C
chrIV	768403	768753	-	YDR154C
chrIV	769525	769938	+	YDR156W
chrIV	770357	771454	+	YDR158W
chrIV	808324	810381	+	YDR172W
chrIV	812110	812850	+	YDR174W
chrIV	836228	836746	-	YDR187C
chrIV	836421	838061	+	YDR188W
chrIV	871074	871301	+	YDR210W
chrIV	892875	893927	+	YDR214W
chrIV	914317	914712	-	YDR224C
chrIV	915530	915928	+	YDR225W
chrIV	916486	917154	+	YDR226W
chrIV	927452	929098	+	YDR232W
chrIV	996029	998323	-	YDR264C
chrIV	1011589	1011960	-	YDR274C
chrIV	1012252	1012959	+	YDR275W
chrIV	1056551	1057600	+	YDR297W
chrIV	1239492	1239824	+	YDR382W
chrIV	1266295	1266795	+	YDR396W
chrIV	1266366	1266898	-	YDR397C
chrIV	1270068	1270733	+	YDR399W
chrIV	1301555	1301926	-	YDR417C
chrIV	1301616	1302113	+	YDR418W
chrIV	1324477	1325301	-	YDR429C
chrIV	1328783	1330027	+	YDR432W
chrIV	1329600	1330040	+	YDR433W
chrIV	1354829	1355553	-	YDR447C
chrIV	1361120	1362181	-	YDR451C
chrIV	1401770	1402564	+	YDR471W
chrIV	1418550	1420250	-	YDR481C
chrIV	1450198	1450853	-	YDR500C
chrIV	1468226	1468573	+	YDR509W
chrIX	68708	69528	+	YIL148W
chrIX	83302	84885	+	YIL142W
chrIX	98527	99416	-	YIL133C
chrIX	100781	102235	-	YIL131C
chrIX	140613	141569	-	YIL117C
chrIX	186517	187632	-	YIL094C
chrIX	231553	232369	-	YIL069C
chrIX	243998	244462	-	YIL062C
chrIX	256226	257063	-	YIL052C
chrIX	265115	267823	-	YIL047C
chrIX	311165	312460	+	YIL022W
chrIX	316768	317932	+	YIL018W
chrIX	321454	321933	+	YIL016W
chrIX	322342	324105	+	YIL015W
chrIX	381948	382382	+	YIR015W
chrIX	421026	421790	-	YIR035C
chrIX	423128	423619	+	YIR037W
chrV	16355	17845	+	YEL071W
chrV	67629	68792	-	YEL046C
chrV	78053	79456	+	YEL040W
chrV	85045	85545	-	YEL035C
chrV	85676	86149	+	YEL034W
chrV	138918	139763	-	YEL009C
chrV	156803	157498	+	YER002W
chrV	191959	192624	-	YER018C
chrV	222639	223076	+	YER035W
chrV	223367	225199	-	YER036C
chrV	235770	237119	-	YER043C
chrV	269423	270185	-	YER056C-A
chrV	298950	301616	+	YER070W
chrV	396769	397653	+	YER117W
chrV	407342	409063	-	YER124C
chrV	421115	422446	-	YER130C
chrV	423591	424311	+	YER131W
chrV	483325	484341	-	YER156C
chrV	491530	491958	-	YER159C
chrV	510373	512106	+	YER165W
chrV	545611	546414	+	YER177W
chrVI	43628	44392	-	YFL045C
chrVI	55366	55986	-	YFL038C
chrVI	75179	76147	+	YFL031W
chrVI	82580	83875	+	YFL026W
chrVI	104701	106236	-	YFL016C
chrVI	153393	154313	+	YFR004W
chrVI	225020	225958	-	YFR034C
chrVI	227513	229186	-	YFR037C
chrVI	249066	249866	-	YFR050C
chrVII	23935	25395	+	YGL253W
chrVII	92512	93591	+	YGL211W
chrVII	123572	124042	-	YGL199C
chrVII	145809	147389	-	YGL190C
chrVII	148229	148966	-	YGL189C
chrVII	227754	228329	-	YGL147C
chrVII	310967	311927	+	YGL103W
chrVII	311505	311933	-	YGL102C
chrVII	364335	365996	-	YGL076C
chrVII	375050	375514	-	YGL069C
chrVII	375087	375671	+	YGL068W
chrVII	398628	400160	+	YGL055W
chrVII	427297	427947	-	YGL037C
chrVII	437467	438397	-	YGL031C
chrVII	439091	439638	+	YGL030W
chrVII	441281	442909	-	YGL028C
chrVII	524365	524694	-	YGR018C
chrVII	534132	534785	-	YGR027C
chrVII	555812	556672	+	YGR034W
chrVII	559731	559994	-	YGR037C
chrVII	596693	598621	+	YGR054W
chrVII	617516	617824	-	YGR063C
chrVII	648383	648907	-	YGR085C
chrVII	726974	727730	+	YGR118W
chrVII	761392	762168	+	YGR135W
chrVII	762428	763153	+	YGR136W
chrVII	762888	763262	+	YGR137W
chrVII	772454	773686	+	YGR142W
chrVII	787312	788178	-	YGR148C
chrVII	806412	807656	-	YGR159C
chrVII	807073	807684	+	YGR160W
chrVII	851047	853215	-	YGR178C
chrVII	911883	912812	+	YGR208W
chrVII	912913	913227	-	YGR209C
chrVII	913503	914738	-	YGR210C
chrVII	915241	916701	+	YGR211W
chrVII	949382	950899	-	YGR229C
chrVII	970771	973734	-	YGR240C
chrVII	979765	982068	-	YGR245C
chrVII	998358	999140	-	YGR253C
chrVII	1000927	1002240	+	YGR254W
chrVII	1061852	1063153	-	YGR285C
chrVIII	35255	36025	-	YHL033C
chrVIII	75412	75777	+	YHL015W
chrVIII	104277	105091	+	YHL001W
chrVIII	120091	121683	-	YHR007C
chrVIII	122889	123590	-	YHR008C
chrVIII	126521	127492	+	YHR010W
chrVIII	147871	148669	-	YHR021C
chrVIII	197398	198285	-	YHR046C
chrVIII	212535	212720	-	YHR053C
chrVIII	214533	214718	-	YHR055C
chrVIII	241664	241840	+	YHR072W-A
chrVIII	362115	362765	+	YHR128W
chrVIII	381990	382751	-	YHR141C
chrVIII	385510	386487	+	YHR143W
chrVIII	387233	387445	+	YHR143W-A
chrVIII	423072	423461	+	YHR162W
chrVIII	452872	453441	+	YHR175W
chrVIII	470939	471412	-	YHR182C-A
chrVIII	470960	472429	+	YHR183W
chrVIII	487712	488236	-	YHR193C
chrVIII	491931	493658	+	YHR196W
chrX	74910	75302	-	YJL190C
chrX	75933	76474	+	YJL189W
chrX	76202	76510	-	YJL188C
chrX	123836	126328	-	YJL157C
chrX	136174	136533	+	YJL152W
chrX	136372	136773	-	YJL151C
chrX	146359	146673	+	YJL144W
chrX	156550	157273	-	YJL136C
chrX	298460	298876	-	YJL075C
chrX	381327	383375	+	YJL034W
chrX	411234	413399	-	YJL012C
chrX	419855	420181	+	YJL009W
chrX	453683	454681	-	YJR009C
chrX	464451	466208	-	YJR016C
chrX	466521	467033	-	YJR017C
chrX	519638	521602	-	YJR045C
chrX	569621	570598	-	YJR070C
chrX	570967	572124	-	YJR072C
chrX	586068	586400	+	YJR086W
chrX	622550	623014	-	YJR104C
chrX	651901	652578	+	YJR123W
chrX	664000	665019	-	YJR129C
chrX	702027	703068	-	YJR145C
chrX	704196	705272	+	YJR147W
chrXI	25215	26159	+	YKL216W
chrXI	39163	42237	+	YKL210W
chrXI	75821	77032	+	YKL195W
chrXI	94499	96265	+	YKL185W
chrXI	98721	99641	+	YKL183W
chrXI	100671	106826	+	YKL182W
chrXI	107316	108599	+	YKL181W
chrXI	109269	110129	+	YKL180W
chrXI	125759	127042	+	YKL172W
chrXI	141794	142819	-	YKL164C
chrXI	158613	159212	+	YKL156W
chrXI	163642	164385	-	YKL152C
chrXI	174213	175616	+	YKL145W
chrXI	178515	179174	+	YKL142W
chrXI	195288	196028	-	YKL130C
chrXI	232227	233891	+	YKL109W
chrXI	281025	282329	-	YKL082C
chrXI	282891	284455	+	YKL081W
chrXI	326408	327487	-	YKL060C
chrXI	334412	334915	-	YKL056C
chrXI	336537	338753	-	YKL054C
chrXI	339668	340546	-	YKL052C
chrXI	431906	432720	+	YKL006W
chrXI	519527	520624	+	YKR042W
chrXI	520897	521712	-	YKR043C
chrXI	525257	525562	+	YKR047W
chrXI	525387	526640	-	YKR048C
chrXI	551657	552242	+	YKR057W
chrXI	576435	578123	-	YKR072C
chrXI	617996	618750	-	YKR094C
chrXII	39804	40414	-	YLL050C
chrXII	47859	48629	-	YLL045C
chrXII	48216	48662	+	YLL044W
chrXII	64062	65207	-	YLL039C
chrXII	88623	91349	+	YLL026W
chrXII	109902	111575	-	YLL018C
chrXII	131205	131414	-	YLL009C
chrXII	196829	198085	-	YLR027C
chrXII	201976	202590	-	YLR029C
chrXII	232390	234081	-	YLR044C
chrXII	242232	243349	+	YLR048W
chrXII	246324	246977	-	YLR051C
chrXII	263194	263948	+	YLR061W
chrXII	281956	282456	-	YLR074C
chrXII	282927	283592	+	YLR075W
chrXII	283185	283607	-	YLR076C
chrXII	286820	287674	+	YLR079W
chrXII	327730	329238	-	YLR094C
chrXII	368781	369311	+	YLR109W
chrXII	369697	370098	-	YLR110C
chrXII	399657	402488	+	YLR129W
chrXII	440467	441288	+	YLR150W
chrXII	445524	447575	-	YLR153C
chrXII	498947	499405	+	YLR167W
chrXII	506134	507585	+	YLR175W
chrXII	514108	514713	-	YLR179C
chrXII	522663	523288	+	YLR185W
chrXII	540809	541573	-	YLR194C
chrXII	543968	545698	+	YLR196W
chrXII	552270	552605	+	YLR204W
chrXII	568567	570627	+	YLR214W
chrXII	572096	573211	-	YLR216C
chrXII	625168	626331	-	YLR244C
chrXII	636780	639914	+	YLR249W
chrXII	658826	659791	+	YLR257W
chrXII	663284	665002	-	YLR259C
chrXII	708448	710136	-	YLR286C
chrXII	721999	722373	-	YLR295C
chrXII	728955	730301	+	YLR300W
chrXII	735212	737548	-	YLR304C
chrXII	790676	791806	+	YLR332W
chrXII	795573	796335	-	YLR333C
chrXII	805784	806335	-	YLR339C
chrXII	805887	806825	+	YLR340W
chrXII	819312	820142	+	YLR344W
chrXII	827521	828027	+	YLR349W
chrXII	828730	829380	+	YLR350W
chrXII	836350	837357	-	YLR354C
chrXII	838066	839253	-	YLR355C
chrXII	855878	857317	+	YLR367W
chrXII	871453	871842	-	YLR374C
chrXII	919536	921596	-	YLR399C
chrXII	929789	930892	+	YLR405W
chrXII	951156	953183	+	YLR413W
chrXII	953353	954144	-	YLR414C
chrXII	965090	965560	-	YLR421C
chrXII	1018141	1018908	-	YLR441C
chrXII	1028854	1029768	+	YLR448W
chrXIII	20761	21699	-	YML125C
chrXIII	56773	57453	+	YML106W
chrXIII	123227	124172	-	YML073C
chrXIII	146482	147249	+	YML063W
chrXIII	220138	220728	+	YML028W
chrXIII	222987	223828	-	YML026C
chrXIII	225889	226697	+	YML024W
chrXIII	272193	272663	+	YMR002W
chrXIII	434788	435915	+	YMR083W
chrXIII	484084	486147	+	YMR108W
chrXIII	499456	500688	-	YMR116C
chrXIII	509734	510348	-	YMR121C
chrXIII	533163	534698	-	YMR131C
chrXIII	550206	551207	-	YMR142C
chrXIII	554793	556475	-	YMR145C
chrXIII	557481	558524	-	YMR146C
chrXIII	632355	634472	+	YMR186W
chrXIII	651145	651910	+	YMR194W
chrXIII	671887	674766	-	YMR205C
chrXIII	701790	703367	+	YMR217W
chrXIII	720960	721403	-	YMR225C
chrXIII	753225	754220	-	YMR242C
chrXIII	759807	761891	+	YMR246W
chrXIII	818827	819948	+	YMR276W
chrXIII	858209	858568	+	YMR294W-A
chrXIII	858297	858890	-	YMR295C
chrXIII	879063	880232	-	YMR305C
chrXIII	912880	914538	-	YMR319C
chrXIV	24048	27173	+	YNL327W
chrXIV	61958	62943	-	YNL302C
chrXIV	63570	64562	-	YNL301C
chrXIV	107687	108274	+	YNL282W
chrXIV	138550	140385	+	YNL268W
chrXIV	167329	167790	-	YNL255C
chrXIV	172588	174315	-	YNL251C
chrXIV	187170	187496	-	YNL244C
chrXIV	215987	217042	-	YNL231C
chrXIV	252059	253900	+	YNL209W
chrXIV	254418	255017	+	YNL208W
chrXIV	282395	283009	+	YNL190W
chrXIV	302680	303402	+	YNL178W
chrXIV	331322	332154	+	YNL162W
chrXIV	349251	349658	+	YNL150W
chrXIV	349367	349756	-	YNL149C
chrXIV	352414	352530	+	YNL145W
chrXIV	375321	378491	+	YNL132W
chrXIV	392892	394370	+	YNL124W
chrXIV	394685	397678	+	YNL123W
chrXIV	413639	416281	+	YNL112W
chrXIV	439602	440570	-	YNL098C
chrXIV	443398	444315	-	YNL096C
chrXIV	478566	479165	-	YNL079C
chrXIV	493956	495001	-	YNL069C
chrXIV	499681	500256	+	YNL067W
chrXIV	508776	510212	-	YNL062C
chrXIV	529942	531411	+	YNL053W
chrXIV	557920	559002	-	YNL037C
chrXIV	575640	576050	-	YNL031C
chrXIV	576727	577038	+	YNL030W
chrXIV	618507	619565	-	YNL007C
chrXIV	654673	661374	-	YNR016C
chrXIV	664270	664944	+	YNR018W
chrXIV	694361	694822	-	YNR036C
chrXIV	721120	723112	-	YNR053C
chrXIV	755746	759099	-	YNR067C
chrXV	28703	31606	-	YOL155C
chrXV	80348	81190	+	YOL127W
chrXV	81787	82920	-	YOL126C
chrXV	87844	89448	+	YOL123W
chrXV	93395	94402	-	YOL120C
chrXV	110297	110638	+	YOL109W
chrXV	159548	160594	-	YOL086C
chrXV	217126	218448	+	YOL059W
chrXV	254297	254617	+	YOL039W
chrXV	255337	256101	+	YOL038W
chrXV	256745	259030	+	YOL036W
chrXV	286172	287950	+	YOL020W
chrXV	307938	309041	+	YOL010W
chrXV	315813	316175	-	YOL005C
chrXV	338938	339978	-	YOR007C
chrXV	370524	370844	-	YOR020C
chrXV	381053	382822	+	YOR027W
chrXV	407064	407921	+	YOR040W
chrXV	426772	427224	-	YOR052C
chrXV	472725	473369	+	YOR078W
chrXV	490196	490828	-	YOR089C
chrXV	493433	494470	+	YOR091W
chrXV	505794	506767	+	YOR096W
chrXV	552298	552887	-	YOR122C
chrXV	575098	577626	+	YOR133W
chrXV	580159	580500	-	YOR135C
chrXV	580250	581359	+	YOR136W
chrXV	619840	624375	+	YOR153W
chrXV	678191	678793	-	YOR182C
chrXV	722911	724725	+	YOR204W
chrXV	761614	762084	-	YOR226C
chrXV	778555	779405	-	YOR234C
chrXV	815915	816931	-	YOR261C
chrXV	867098	867852	+	YOR293W
chrXV	896825	898360	-	YOR310C
chrXV	900250	901194	-	YOR312C
chrXV	956898	957989	+	YOR338W
chrXV	1015361	1017652	-	YOR361C
chrXV	1017880	1018746	-	YOR362C
chrXVI	74309	74719	-	YPL250C
chrXVI	96496	98625	-	YPL240C
chrXVI	100496	101353	+	YPL237W
chrXVI	121767	125357	+	YPL226W
chrXVI	133043	135424	+	YPL221W
chrXVI	164276	165760	+	YPL204W
chrXVI	282122	282970	+	YPL143W
chrXVI	297553	298050	+	YPL135W
chrXVI	303121	304014	+	YPL131W
chrXVI	350194	352275	-	YPL106C
chrXVI	370978	372921	+	YPL093W
chrXVI	377291	378395	-	YPL090C
chrXVI	404950	406044	+	YPL081W
chrXVI	406636	407539	+	YPL079W
chrXVI	481428	481901	-	YPL037C
chrXVI	642208	643320	+	YPR035W
chrXVI	643836	645272	+	YPR036W
chrXVI	648704	649921	+	YPR041W
chrXVI	654166	654847	+	YPR043W
chrXVI	677165	677641	+	YPR062W
chrXVI	679693	680799	+	YPR065W
chrXVI	711354	711674	+	YPR087W
chrXVI	711403	713028	-	YPR088C
chrXVI	732349	733212	+	YPR103W
chrXVI	742454	743743	+	YPR108W
chrXVI	745828	746835	-	YPR110C
chrXVI	786141	786575	-	YPR123C
chrXVI	786208	787428	+	YPR124W
chrXVI	794965	795767	+	YPR132W
chrXVI	822620	824338	+	YPR145W
chrXVI	829918	830439	+	YPR149W
chrXVI	843262	844020	+	YPR158W
chrXVI	875368	875997	+	YPR165W
chrXVI	878076	878549	+	YPR168W
chrXVI	878690	880168	+	YPR169W
chrXVI	900194	900454	+	YPR182W

## Sheet: confidence intervals
	99% Confidence intervals
Sample: (BC=bead control; IP=immunoprecipitation)	lower limit	upper limit	number of simulations in which the simulated value was greater than or equal to the actual (IP) value
G1 BC	0.932988	0.968547	(953/1000)
G1 IP	0.000005	0.007406	( 1/1000)
G1 + CPT BC	0.450896	0.533181	(492/1000)
G1 + CPT IP	0.000000	0.005284	( 0/1000)
S BC	0.000005	0.007406	1/1000)
S IP	0.682962	0.756901	(721/1000)
S + CPT BC	0.753915	0.821286	(789/1000)
S + CPT IP	0.000000	0.005284	( 0/1000)
