# Supplementary material for: Sae2/CtIP prevents R-loop accumulation in eukaryotic cells
Source: eLife. 2018 Dec 7;7:e42733. doi: 10.7554/eLife.42733 (PMC6296784; doi:10.7554/eLife.42733)
Supplement: Supplementary file 3. [file elife-42733-supp3.xlsx]

## Sheet: featureCounts_count_matrix.txt
RNA-seq feature counts from wild-type and CtIP-depleted cells, with or without CPT treatment.
Gene	Chromosome	Length	shRNA CtIP	shRNA CtIP + CPT	Wild-type	Wild-type + CPT
ENSG00000000003.10	chrX	2968	19101	17520	12841	13097
ENSG00000000005.5	chrX	1610	0	0	0	0
ENSG00000000419.8	chr20	1207	19057	17864	15535	15947
ENSG00000000457.8	chr1	3844	540	290	573	237
ENSG00000000460.12	chr1	6354	4016	3428	4351	3917
ENSG00000000938.8	chr1	3474	0	0	0	0
ENSG00000000971.11	chr1	8144	54	30	337	373
ENSG00000001036.8	chr6	2453	19149	18082	20629	19744
ENSG00000001084.6	chr6	8463	7280	5788	8643	7738
ENSG00000001167.10	chr6	3811	2250	1601	2703	1503
ENSG00000001460.13	chr1	8514	1552	1308	1883	1619
ENSG00000001461.12	chr1	9404	2639	2659	1991	2105
ENSG00000001497.12	chrX	5589	27708	28951	21710	23946
ENSG00000001561.6	chr6	4651	3144	3158	3458	4241
ENSG00000001617.7	chr3	4826	1414	1583	1235	1098
ENSG00000001626.9	chr7	7255	0	0	8	2
ENSG00000001629.5	chr7	7130	6952	8140	10781	9582
ENSG00000001630.11	chr7	4074	411	576	455	338
ENSG00000001631.10	chr7	6204	2027	2201	2748	3052
ENSG00000002016.12	chr12	4190	3753	3148	3441	2765
ENSG00000002079.8	chr7	6387	1750	1935	1870	2111
ENSG00000002330.9	chr11	1708	5661	4606	7472	5253
ENSG00000002549.8	chr4	3785	9498	9859	10134	11147
ENSG00000002586.13	chrX	3284	1	2	0	0
ENSG00000002587.5	chr4	8166	0	0	0	0
ENSG00000002726.15	chr7	3824	0	0	54	40
ENSG00000002745.8	chr7	3261	0	0	0	0
ENSG00000002746.9	chr7	11303	550	573	748	644
ENSG00000002822.11	chr7	6955	9097	9210	7873	7201
ENSG00000002834.13	chr17	7061	41681	45195	36389	37087
ENSG00000002919.10	chr17	3606	9634	8601	11259	7611
ENSG00000002933.3	chr7	3479	120	110	84	70
ENSG00000003056.3	chr12	3777	21190	22802	22317	21456
ENSG00000003096.9	chrX	6983	1055	845	824	662
ENSG00000003137.4	chr2	5015	3122	2966	3900	3655
ENSG00000003147.13	chr7	4891	286	270	430	566
ENSG00000003249.9	chr16	3522	3876	3844	635	805
ENSG00000003393.10	chr2	10381	4499	3244	4226	3386
ENSG00000003400.10	chr2	7598	380	347	574	524
ENSG00000003402.14	chr2	10151	3375	3072	5260	3694
ENSG00000003436.10	chr2	11714	3518	2690	7099	7152
ENSG00000003509.11	chr2	3651	1770	1500	1606	1426
ENSG00000003756.12	chr3	10368	12176	10212	10364	8710
ENSG00000003987.9	chr8	5692	45	97	59	55
ENSG00000003989.12	chr8	7905	6795	7137	3639	3266
ENSG00000004059.6	chr7	1871	9784	10892	11157	9374
ENSG00000004139.9	chr17	8132	28	38	29	36
ENSG00000004142.7	chr17	2662	13389	15412	15120	15266
ENSG00000004399.8	chr3	9738	6074	7203	4885	5001
ENSG00000004455.12	chr1	5683	22621	23365	31348	28113
ENSG00000004468.7	chr4	3071	0	0	4	2
ENSG00000004478.5	chr12	3958	63834	72842	63392	64811
ENSG00000004487.11	chr1	5447	16418	15717	15655	14191
ENSG00000004534.10	chr3	7300	14703	14111	11206	12453
ENSG00000004660.10	chr17	7424	2014	1791	2882	2065
ENSG00000004700.11	chr12	3778	20740	21555	21951	24813
ENSG00000004766.11	chr7	7359	3220	2375	3418	2867
ENSG00000004776.7	chr19	1722	2	26	35	44
ENSG00000004777.14	chr19	5260	1478	1449	995	1638
ENSG00000004779.5	chr16	1600	47277	40867	46476	38623
ENSG00000004799.7	chr7	4519	62	64	70	112
ENSG00000004809.9	chr6	3791	0	18	46	15
ENSG00000004838.9	chr3	4009	295	362	228	184
ENSG00000004846.12	chr7	9257	10	0	14	2
ENSG00000004848.6	chrX	2876	0	0	8	2
ENSG00000004864.9	chr7	3710	9625	9904	8954	7745
ENSG00000004866.14	chr7	6742	2499	2154	2401	2145
ENSG00000004897.7	chr17	6824	20970	18369	22610	19815
ENSG00000004939.9	chr17	5287	0	4	2	2
ENSG00000004948.9	chr7	4036	22	10	14	10
ENSG00000004961.10	chrX	2335	2476	1801	2421	2166
ENSG00000004975.7	chr17	5350	4559	5164	5736	5188
ENSG00000005001.5	chr16	2387	2	6	2	4
ENSG00000005007.8	chr19	8600	9169	9130	11270	9852
ENSG00000005020.8	chr7	5520	84	130	95	105
ENSG00000005022.5	chrX	1500	151061	160957	86245	79997
ENSG00000005059.11	chr4	3558	1791	1689	2424	2481
ENSG00000005073.5	chr7	2307	1309	1271	1800	1987
ENSG00000005075.11	chr7	962	5550	5463	6156	6810
ENSG00000005100.8	chr17	5872	6838	7624	9085	7623
ENSG00000005102.8	chr17	2707	36	20	14	28
ENSG00000005108.10	chr7	6660	8	6	98	119
ENSG00000005156.7	chr17	8240	3390	3654	4543	4221
ENSG00000005175.5	chr12	3343	9414	8595	11132	12924
ENSG00000005187.7	chr16	5095	146	180	291	360
ENSG00000005189.15	chr16	4111	1367	1244	1117	830
ENSG00000005194.10	chr16	3509	27102	26436	19423	15536
ENSG00000005206.11	chr19	8002	3764	4465	3591	3863
ENSG00000005238.15	chr9	6409	3780	3453	3859	3673
ENSG00000005243.5	chr17	1847	9144	9189	9074	8357
ENSG00000005249.8	chr7	4318	3079	3042	2187	2324
ENSG00000005302.13	chrX	6494	3089	3048	3462	3645
ENSG00000005339.8	chr16	15068	4083	3544	5428	4193
ENSG00000005379.11	chr17	11382	2	0	8	2
ENSG00000005381.6	chr17	3622	8	0	2	0
ENSG00000005421.4	chr7	2988	4	2	7	6
ENSG00000005436.9	chr2	5465	4240	3640	5851	5800
ENSG00000005448.12	chr2	2860	7255	7377	9771	7869
ENSG00000005469.7	chr7	4979	1246	1250	2069	2442
ENSG00000005471.11	chr7	7494	24	34	165	266
ENSG00000005483.15	chr7	9227	3585	2143	4580	2836
ENSG00000005486.12	chr7	2441	740	702	852	1066
ENSG00000005513.9	chr16	4432	152	140	60	34
ENSG00000005700.10	chr6	8722	8076	7657	8064	8559
ENSG00000005801.12	chr11	5705	2494	1292	2549	1979
ENSG00000005810.13	chr13	15943	3196	3164	2764	2173
ENSG00000005812.6	chr13	4651	2700	1912	1967	1274
ENSG00000005844.13	chr16	6472	4	0	6	2
ENSG00000005882.7	chr17	5481	4133	4214	3635	4250
ENSG00000005884.13	chr17	9802	36515	41182	48930	54461
ENSG00000005889.11	chrX	9037	1811	838	1969	796
ENSG00000005893.11	chrX	5617	19010	21197	13699	14321
ENSG00000005955.8	chr17	9729	3040	1860	3106	2772
ENSG00000005961.13	chr17	5551	62	66	95	108
ENSG00000005981.8	chr7	4605	0	2	0	0
ENSG00000006007.7	chr16	4412	10268	10908	11961	13526
ENSG00000006015.13	chr19	3370	1557	1449	2329	1986
ENSG00000006016.6	chr19	3018	412	464	382	329
ENSG00000006025.7	chr17	6572	3692	3162	3187	4359
ENSG00000006042.7	chr17	5187	10559	10124	12140	10498
ENSG00000006047.8	chr17	4618	14	14	6	14
ENSG00000006059.3	chr17	1287	0	0	0	0
ENSG00000006062.9	chr17	5132	11940	7127	11671	5528
ENSG00000006071.7	chr11	6835	87	109	14	64
ENSG00000006074.4	chr17	1397	8	0	0	8
ENSG00000006075.11	chr17	1494	438	366	798	416
ENSG00000006114.11	chr17	14277	4040	3657	4668	3883
ENSG00000006116.3	chr16	3088	0	0	0	0
ENSG00000006118.10	chr11	7271	19673	23224	25658	25877
ENSG00000006125.12	chr17	7797	9909	15160	16570	21473
ENSG00000006128.7	chr7	1888	0	0	0	0
ENSG00000006194.6	chr16	9329	3243	2513	4436	2758
ENSG00000006210.6	chr16	5983	566	636	404	444
ENSG00000006282.15	chr17	5237	26433	25923	32384	30242
ENSG00000006283.13	chr17	9709	608	470	463	442
ENSG00000006327.9	chr16	1848	38871	30463	68118	38372
ENSG00000006377.9	chr7	3449	0	0	0	0
ENSG00000006432.11	chr14	12386	3310	2712	3946	2256
ENSG00000006451.3	chr7	3665	11885	10599	9473	8713
ENSG00000006453.9	chr7	4798	12699	12463	13675	15707
ENSG00000006459.6	chr7	9430	648	494	737	463
ENSG00000006468.9	chr7	9686	512	457	888	895
ENSG00000006530.11	chr7	6547	1187	1354	1591	1531
ENSG00000006534.11	chr11	6621	4249	4508	3142	3271
ENSG00000006555.6	chr1	6055	0	0	0	0
ENSG00000006576.12	chr7	8631	8634	8226	8779	8062
ENSG00000006606.4	chr7	706	476	436	510	538
ENSG00000006607.8	chr2	9016	1035	1077	1126	998
ENSG00000006611.11	chr11	4187	0	0	8	12
ENSG00000006625.13	chr7	1905	18588	16491	16618	16429
ENSG00000006634.3	chr7	4583	3533	3034	6139	5647
ENSG00000006638.7	chr19	2793	120	82	50	52
ENSG00000006652.9	chr7	6481	3149	1209	5796	2350
ENSG00000006659.8	chr19	1079	6	2	0	0
ENSG00000006695.6	chr17	3172	2415	1998	2675	1882
ENSG00000006704.6	chr7	6498	2548	2106	3648	2644
ENSG00000006712.10	chr19	2668	6057	7128	7416	6360
ENSG00000006715.11	chr7	7801	7175	7479	6799	7772
ENSG00000006740.11	chr17	9476	689	693	621	761
ENSG00000006744.13	chr17	6326	6536	6844	6674	6833
ENSG00000006747.10	chr7	5048	36	30	20	16
ENSG00000006756.11	chrX	7030	2	6	12	10
ENSG00000006757.7	chrX	3441	2161	2209	2176	1684
ENSG00000006788.7	chr17	6347	0	0	0	0
ENSG00000006831.9	chr12	5878	43652	41443	48280	40833
ENSG00000006837.6	chr5	3681	245	263	214	330
ENSG00000007001.8	chr2	2957	0	0	1	0
ENSG00000007038.6	chr16	1984	0	0	0	4
ENSG00000007047.10	chr19	6668	1403	1232	1479	1811
ENSG00000007062.7	chr4	7465	0	0	5	0
ENSG00000007080.6	chr19	1660	8387	9378	7814	7087
ENSG00000007129.13	chr19	1926	0	0	0	0
ENSG00000007168.7	chr17	7607	17480	13823	20036	17701
ENSG00000007171.12	chr17	4176	84	87	332	328
ENSG00000007174.12	chr17	17398	6	0	8	0
ENSG00000007202.10	chr17	9235	31227	37005	27407	29538
ENSG00000007216.10	chr17	3226	4	0	0	8
ENSG00000007237.13	chr17	10100	238	310	188	174
ENSG00000007255.6	chr19	933	898	796	541	406
ENSG00000007264.9	chr19	4138	450	511	258	305
ENSG00000007306.10	chr19	2649	0	0	0	0
ENSG00000007312.8	chr17	2080	0	2	6	28
ENSG00000007314.7	chr17	8247	55	74	44	38
ENSG00000007341.14	chr1	8111	1962	1720	2251	2027
ENSG00000007350.12	chrX	3650	0	0	0	0
ENSG00000007372.16	chr11	14776	0	0	4	0
ENSG00000007376.3	chr16	2769	7566	7308	7729	5934
ENSG00000007384.11	chr16	5104	6773	6331	7312	7136
ENSG00000007392.12	chr16	6176	4626	3947	5527	5280
ENSG00000007402.7	chr3	6319	803	807	724	787
ENSG00000007516.9	chr16	6143	477	528	729	798
ENSG00000007520.3	chr16	1243	8781	8688	8313	6821
ENSG00000007541.10	chr16	6869	6361	7232	8809	8754
ENSG00000007545.11	chr16	8427	1591	1295	1613	1287
ENSG00000007866.14	chr6	3046	1961	2131	2811	2596
ENSG00000007908.10	chr1	4219	0	0	0	0
ENSG00000007923.11	chr1	5147	12259	14034	6144	5993
ENSG00000007933.8	chr1	3463	0	0	0	0
ENSG00000007944.10	chr6	3033	911	414	1995	631
ENSG00000007952.13	chrX	2529	0	0	0	0
ENSG00000007968.6	chr1	5457	2887	2272	3509	2990
ENSG00000008018.8	chr6	2256	32179	28896	42147	34412
ENSG00000008056.8	chrX	3203	143	170	74	74
ENSG00000008083.9	chr6	6490	2806	1801	2458	1471
ENSG00000008086.6	chrX	3576	72	137	204	237
ENSG00000008118.5	chr1	2676	8	28	26	28
ENSG00000008128.18	chr1	4707	115	96	111	104
ENSG00000008130.11	chr1	5637	5401	5292	6061	4965
ENSG00000008196.8	chr6	6149	0	0	0	0
ENSG00000008197.4	chr6	1856	0	0	0	0
ENSG00000008226.15	chr3	8338	2	8	4	2
ENSG00000008256.11	chr7	5805	18934	19007	19167	17389
ENSG00000008277.10	chr7	12217	665	674	602	771
ENSG00000008282.3	chr7	2794	17366	15318	14952	16455
ENSG00000008283.11	chr17	5320	15702	16981	21359	20023
ENSG00000008294.16	chr17	11948	14899	14399	17446	15987
ENSG00000008300.10	chr3	13888	7315	6912	8024	6081
ENSG00000008311.10	chr7	4591	1094	1129	1338	1558
ENSG00000008323.11	chr12	4260	18	2	2	0
ENSG00000008324.6	chr3	1301	18439	14765	16597	15115
ENSG00000008382.11	chr19	2049	753	923	1213	1212
ENSG00000008394.8	chr12	6213	23313	22507	34776	39004
ENSG00000008405.7	chr12	5062	6516	5163	5415	4611
ENSG00000008438.4	chr19	720	0	0	0	0
ENSG00000008441.12	chr19	6302	5527	6180	4454	4739
ENSG00000008513.10	chr8	8730	10932	7763	6894	3559
ENSG00000008516.12	chr16	4126	34	16	4	0
ENSG00000008517.12	chr16	2924	24402	25923	28332	23021
ENSG00000008710.13	chr16	18532	8312	8360	10149	7712
ENSG00000008735.10	chr22	6107	78	66	106	86
ENSG00000008838.13	chr17	6962	8931	9135	10230	11016
ENSG00000008853.12	chr8	6580	3075	3332	2479	2400
ENSG00000008869.7	chr2	8206	2371	2787	2715	2857
ENSG00000008952.12	chr3	7928	2593	2427	2550	2545
ENSG00000008988.5	chr8	2931	208495	178683	199699	226191
ENSG00000009307.11	chr1	5755	97173	113756	100945	130462
ENSG00000009335.13	chr7	9218	7455	7005	7058	6120
ENSG00000009413.11	chr6	12417	4053	2586	5896	3435
ENSG00000009694.9	chrX	12896	38	40	16	26
ENSG00000009709.7	chr1	6313	907	642	1495	1274
ENSG00000009724.12	chr1	4251	30	2	4	0
ENSG00000009765.10	chr6	10362	0	0	8	8
ENSG00000009780.11	chr1	4034	1139	917	866	791
ENSG00000009790.10	chr1	7753	18	14	2	1
ENSG00000009830.7	chr14	10012	10319	11534	11150	11908
ENSG00000009844.11	chr6	7194	12329	11406	12952	13515
ENSG00000009950.11	chr7	4815	30	52	18	12
ENSG00000009954.6	chr7	7053	2826	2796	3925	3622
ENSG00000010017.9	chr6	3480	4433	3735	4350	3637
ENSG00000010030.9	chr6	2369	37	32	67	56
ENSG00000010072.11	chr1	5906	1804	1507	1478	989
ENSG00000010165.14	chr1	3843	9553	8716	9694	6991
ENSG00000010219.9	chr12	5911	4847	4674	5636	5206
ENSG00000010244.12	chr17	15834	18366	15589	16989	18005
ENSG00000010256.6	chr3	3236	45275	49322	36274	33659
ENSG00000010270.9	chr7	4348	17731	16392	15182	13797
ENSG00000010278.7	chr12	3218	36527	40991	41883	38036
ENSG00000010282.10	chr3	2891	5	4	8	2
ENSG00000010292.8	chr12	6487	55112	64867	61432	63567
ENSG00000010295.15	chr12	5193	602	400	3151	1437
ENSG00000010310.4	chr19	4736	46	27	79	56
ENSG00000010318.14	chr3	3644	937	825	435	473
ENSG00000010319.2	chr3	5011	1533	1751	1083	1354
ENSG00000010322.11	chr3	9161	8974	8025	7284	6177
ENSG00000010327.6	chr3	10588	4	2	14	12
ENSG00000010361.9	chr19	2951	1288	1279	904	720
ENSG00000010379.11	chr12	4241	125	58	130	56
ENSG00000010404.13	chrX	10496	702	1100	1536	1614
ENSG00000010438.12	chr9	1614	6	2	2	4
ENSG00000010539.7	chr16	7498	1786	1132	1605	1184
ENSG00000010610.5	chr12	4583	0	0	0	0
ENSG00000010626.10	chr12	3054	2076	2156	1761	2033
ENSG00000010671.11	chrX	4227	36	18	20	18
ENSG00000010704.14	chr6	5675	0	0	0	2
ENSG00000010803.12	chr1	4447	3615	3477	5070	4662
ENSG00000010810.12	chr6	7411	1923	1921	2154	2071
ENSG00000010818.4	chr6	9774	2583	1798	3527	2329
ENSG00000010932.11	chr1	3574	0	0	0	0
ENSG00000011007.7	chr1	5391	9193	10142	11371	11741
ENSG00000011009.6	chr1	2196	9259	9941	13395	12964
ENSG00000011021.17	chr1	6884	5981	5898	3302	3806
ENSG00000011028.9	chr17	6860	12763	14825	13360	16249
ENSG00000011052.16	chr17	1657	0	0	0	0
ENSG00000011083.4	chr5	4391	0	0	8	2
ENSG00000011105.7	chr12	5714	7869	8063	10754	9106
ENSG00000011114.10	chr14	11333	3037	2391	3495	2822
ENSG00000011132.7	chr19	5556	982	1017	1129	1154
ENSG00000011143.12	chr17	4073	6223	6671	6415	5972
ENSG00000011198.3	chr3	3172	4269	4117	4774	4830
ENSG00000011201.6	chrX	7131	15091	16416	20195	21421
ENSG00000011243.12	chr19	5218	3729	3572	4290	4997
ENSG00000011258.11	chr17	7201	2381	1802	2585	2056
ENSG00000011260.9	chr17	2721	15081	14317	19600	17677
ENSG00000011275.14	chr7	7619	14185	12688	15526	13462
ENSG00000011295.11	chr17	5966	3477	2740	3109	2955
ENSG00000011304.12	chr19	6969	45456	49198	49543	57233
ENSG00000011332.15	chr19	4800	780	693	779	744
ENSG00000011347.5	chr11	5953	760	783	725	779
ENSG00000011376.5	chr3	5393	6181	6525	6325	5200
ENSG00000011405.9	chr11	9204	9608	9030	5753	5818
ENSG00000011422.7	chr19	4457	12923	12331	20773	21262
ENSG00000011426.6	chr7	6012	45458	48342	37463	46169
ENSG00000011451.12	chr19	9541	3576	3268	3707	3846
ENSG00000011454.12	chr9	8181	5419	4754	5782	5253
ENSG00000011465.12	chr12	8083	0	4	12	4
ENSG00000011478.7	chr19	2396	5130	6658	5362	6452
ENSG00000011485.10	chr19	7059	12976	13898	14652	14509
ENSG00000011523.9	chr2	8623	2762	2688	3527	2990
ENSG00000011566.9	chr2	6070	3018	2333	3697	3227
ENSG00000011590.9	chr19	2770	0	0	0	0
ENSG00000011600.7	chr19	907	0	0	0	0
ENSG00000011638.6	chr16	2558	1517	1440	2140	1470
ENSG00000011677.7	chrX	4398	1043	1163	1502	1673
ENSG00000012048.15	chr17	8278	7538	7150	8028	7465
ENSG00000012061.11	chr19	5576	6866	7347	10518	11195
ENSG00000012124.10	chr19	5839	1974	2238	832	917
ENSG00000012171.13	chr3	5767	822	602	338	302
ENSG00000012174.7	chrX	8927	1824	1790	2144	1905
ENSG00000012211.8	chrX	3396	314	414	390	372
ENSG00000012223.8	chr3	4247	31	28	30	18
ENSG00000012232.4	chr8	13220	10964	11303	21155	18216
ENSG00000012504.9	chr12	3460	2	8	10	2
ENSG00000012660.9	chr6	4223	20421	23274	22191	25704
ENSG00000012779.6	chr10	3685	1213	1240	1191	1232
ENSG00000012817.11	chrY	9463	0	0	2	0
ENSG00000012822.11	chr12	6296	2767	3148	2987	2592
ENSG00000012963.9	chr14	3694	8306	7011	8396	7375
ENSG00000012983.7	chr14	7620	7480	8108	12338	13739
ENSG00000013016.10	chr2	4959	1842	2077	1473	1444
ENSG00000013275.3	chr19	2387	11485	12843	15299	16635
ENSG00000013288.4	chr4	8898	2688	3098	2285	2484
ENSG00000013293.4	chr3	5478	0	0	0	0
ENSG00000013297.6	chr3	6032	0	0	2	22
ENSG00000013306.11	chr17	3526	80182	87989	78734	79610
ENSG00000013364.14	chr16	6136	6132	7879	8001	9322
ENSG00000013374.11	chr7	5411	3088	3137	2935	3759
ENSG00000013375.10	chr6	7899	3033	2556	2839	3001
ENSG00000013392.6	chr6	4686	545	526	457	332
ENSG00000013441.11	chr2	5125	11149	3654	13256	4754
ENSG00000013503.5	chr12	4858	2845	2255	3511	2378
ENSG00000013523.5	chr14	5347	3589	3977	3626	2994
ENSG00000013561.13	chr5	4834	5727	4930	4831	3694
ENSG00000013563.8	chrX	4646	1168	1276	2819	2525
ENSG00000013573.12	chr12	8374	11711	10322	14427	13437
ENSG00000013583.4	chr12	3442	23403	22660	19129	18222
ENSG00000013588.5	chr12	8440	21551	18122	18256	17396
ENSG00000013619.9	chrX	5958	158	134	120	105
ENSG00000013725.10	chr11	5995	0	0	0	0
ENSG00000013810.14	chr4	4682	9681	10137	11103	11413
ENSG00000014123.9	chr6	4539	2125	2222	3614	3560
ENSG00000014138.4	chr11	5726	10442	9929	12869	12852
ENSG00000014164.6	chr8	3731	2700	2459	2079	1724
ENSG00000014216.11	chr11	7553	18381	23359	23993	25279
ENSG00000014257.11	chr3	4193	0	0	8	6
ENSG00000014641.13	chr2	4993	127893	127494	119398	118225
ENSG00000014824.8	chr4	4302	8340	7518	6549	6473
ENSG00000014914.15	chr1	4591	688	666	1014	1068
ENSG00000014919.8	chr10	4177	8139	8136	7192	7071
ENSG00000015133.14	chr14	12426	16	10	32	24
ENSG00000015153.10	chr12	10840	1621	1416	2189	1951
ENSG00000015171.14	chr10	5300	2042	2078	3330	2981
ENSG00000015285.6	chrX	2381	18	6	0	0
ENSG00000015413.5	chr16	2712	3	0	0	2
ENSG00000015475.14	chr22	4418	7212	7535	6984	6322
ENSG00000015479.13	chr5	14669	56926	58900	56716	62705
ENSG00000015520.10	chr7	5252	30	6	8	8
ENSG00000015532.5	chr17	5472	4657	4667	5695	5051
ENSG00000015568.8	chr2	14175	0	0	15	0
ENSG00000015592.12	chr8	3294	8	0	6	10
ENSG00000015676.12	chr7	6864	9210	9209	6756	5478
ENSG00000016082.10	chr5	3216	0	10	8	11
ENSG00000016391.5	chr3	3733	309	313	475	372
ENSG00000016402.8	chr6	4673	12	0	10	6
ENSG00000016490.11	chr1	3340	0	0	6	0
ENSG00000016602.8	chr1	3649	0	0	0	0
ENSG00000016864.12	chr3	3783	6839	6399	5562	5527
ENSG00000017260.15	chr3	8533	6131	4774	6124	5121
ENSG00000017373.11	chr17	11025	366	514	521	613
ENSG00000017427.11	chr12	8087	0	0	0	0
ENSG00000017483.10	chrX	4016	30	14	28	18
ENSG00000017621.11	chrX	4948	14	2	16	10
ENSG00000017797.7	chr18	4979	16895	18926	29509	29298
ENSG00000018189.8	chr4	8070	3543	3546	2851	2741
ENSG00000018236.10	chr12	7492	2872	2816	4934	5437
ENSG00000018280.12	chr2	8676	26	4	34	26
ENSG00000018408.10	chr3	8413	4446	4249	6022	6283
ENSG00000018510.8	chr2	8197	12423	12450	13159	14819
ENSG00000018607.5	chr2	1774	6	2	10	4
ENSG00000018610.8	chrX	2606	4767	4573	2699	2442
ENSG00000018625.10	chr1	6298	132	108	52	30
ENSG00000018699.7	chr2	3185	5992	5433	6755	6654
ENSG00000018869.12	chr19	3152	645	522	2276	1729
ENSG00000019102.7	chr11	1432	8	6	4	2
ENSG00000019144.12	chr11	21988	2222	2454	1692	1372
ENSG00000019169.9	chr2	2079	707	729	308	308
ENSG00000019186.5	chr20	3972	2907	2697	1816	1132
ENSG00000019485.8	chr11	5527	1464	1212	1482	1086
ENSG00000019505.3	chr11	5424	636	618	350	291
ENSG00000019549.4	chr8	2282	2713	1886	1997	2010
ENSG00000019582.10	chr5	3184	0	0	8	6
ENSG00000019991.11	chr7	8897	0	0	0	0
ENSG00000019995.6	chr10	5993	3994	2528	4332	3145
ENSG00000020129.11	chr1	4917	5425	5352	5954	5592
ENSG00000020181.13	chr8	7061	330	468	431	356
ENSG00000020219.8	chr7	1674	0	0	0	0
ENSG00000020256.15	chr20	6997	5164	4107	5401	3830
ENSG00000020426.6	chr14	3865	8131	6804	9316	8862
ENSG00000020577.9	chr14	12170	9461	8957	10485	8852
ENSG00000020633.14	chr1	4605	258	142	496	358
ENSG00000020922.8	chr11	3538	1954	1824	3087	3418
ENSG00000021300.9	chr11	4933	478	524	486	478
ENSG00000021355.8	chr6	3226	3491	3324	4620	4324
ENSG00000021461.12	chr7	2630	2	0	0	0
ENSG00000021488.8	chr19	2597	67	38	22	4
ENSG00000021574.7	chr2	5213	3916	2868	3397	2954
ENSG00000021645.13	chr14	11335	1316	1121	1358	1114
ENSG00000021762.15	chr11	7466	2694	2744	3147	2809
ENSG00000021776.6	chr15	9779	4452	4530	5998	5846
ENSG00000021826.10	chr2	10444	2673	3157	1745	2216
ENSG00000021852.8	chr1	2729	0	0	0	0
ENSG00000022267.12	chrX	4945	26384	30703	26930	33278
ENSG00000022277.8	chr20	3501	21302	21820	16394	13430
ENSG00000022355.10	chr5	5494	26	8	12	42
ENSG00000022556.11	chr19	6313	0	0	0	0
ENSG00000022567.5	chr8	8608	1635	1347	1719	1358
ENSG00000022840.11	chr12	5911	10015	10690	10520	10441
ENSG00000022976.11	chr14	5595	1218	1158	1209	1201
ENSG00000023041.7	chr10	2404	5298	4500	6233	6050
ENSG00000023171.10	chr11	9770	7385	6363	9456	6872
ENSG00000023191.12	chr11	7367	18987	22185	19336	20019
ENSG00000023228.8	chr2	5660	10838	13676	12529	13057
ENSG00000023287.8	chr8	7615	4778	4923	5715	5693
ENSG00000023318.7	chr9	4854	9186	7706	10567	13084
ENSG00000023330.10	chr3	2536	10297	10878	12219	11290
ENSG00000023445.9	chr11	7484	8423	5894	9838	6240
ENSG00000023516.7	chr13	9913	3242	2659	2995	3295
ENSG00000023572.4	chr1	1299	850	669	858	852
ENSG00000023608.4	chr14	2656	11051	10298	21942	20259
ENSG00000023697.8	chr12	2848	7501	7759	7910	9093
ENSG00000023734.6	chr12	2211	91078	96371	85938	91527
ENSG00000023839.6	chr10	6232	636	518	1224	1097
ENSG00000023892.9	chr6	2675	15	16	970	984
ENSG00000023902.9	chr1	6629	1030	998	1426	1244
ENSG00000023909.5	chr1	5374	4072	3549	8844	8004
ENSG00000024048.6	chr6	8997	2247	1720	2148	1640
ENSG00000024422.7	chr19	3923	1082	1082	1200	1186
ENSG00000024526.12	chr1	5904	7846	6916	7628	6707
ENSG00000024862.12	chr6	1496	1505	1125	1097	1160
ENSG00000025039.9	chr6	5072	4210	3621	2856	2740
ENSG00000025156.7	chr6	2707	3565	2518	4527	3312
ENSG00000025293.11	chr20	7812	1544	1305	1520	1032
ENSG00000025423.7	chr12	2272	308	266	243	204
ENSG00000025434.14	chr11	4346	2407	2142	1737	1607
ENSG00000025708.8	chr22	3320	194	178	166	110
ENSG00000025770.14	chr22	3159	13730	15118	9384	8738
ENSG00000025772.7	chr20	2062	32513	30690	22940	21386
ENSG00000025796.9	chr6	8587	5117	4329	4828	6039
ENSG00000025800.9	chr1	7687	5954	5334	7206	6026
ENSG00000026025.9	chr10	4965	78655	89948	104148	157129
ENSG00000026036.16	chr20	8738	529	624	478	690
ENSG00000026103.15	chr10	3562	3803	3160	4465	3940
ENSG00000026297.11	chr6	7478	1455	1505	1636	1726
ENSG00000026508.12	chr11	10060	44999	43984	25246	29832
ENSG00000026559.8	chr20	3748	5171	6178	3075	2428
ENSG00000026652.9	chr6	9419	2850	2455	3205	3007
ENSG00000026751.12	chr1	4604	2723	3060	3630	3835
ENSG00000026950.12	chr6	5547	567	496	1246	1125
ENSG00000027001.7	chr13	3407	3794	3664	2821	2874
ENSG00000027075.9	chr14	8809	7383	5623	8158	7720
ENSG00000027644.4	chr1	5101	6	0	12	12
ENSG00000027697.8	chr6	2680	4288	3302	4983	3412
ENSG00000027847.9	chr5	4927	2439	2338	1992	1670
ENSG00000027869.7	chr1	2512	2	2	68	56
ENSG00000028116.12	chr2	3557	6950	7427	9411	9914
ENSG00000028137.12	chr1	3766	18	14	2	4
ENSG00000028203.13	chr12	8757	4190	4082	6918	6788
ENSG00000028277.16	chr19	8899	101	123	213	206
ENSG00000028310.13	chr5	9577	2858	2799	8327	8606
ENSG00000028528.10	chr15	9796	12852	14406	15908	15946
ENSG00000028839.5	chr6	5039	4291	2521	4714	3059
ENSG00000029153.10	chr12	5002	13557	14013	18312	19495
ENSG00000029363.11	chr6	9297	20738	20872	24144	26543
ENSG00000029364.7	chr14	7136	10359	8457	9442	8304
ENSG00000029534.15	chr8	10799	849	761	406	443
ENSG00000029559.5	chr4	1033	0	0	0	0
ENSG00000029639.6	chr6	2736	3320	3260	3816	3464
ENSG00000029725.12	chr17	6555	5594	4937	5315	5385
ENSG00000029993.10	chrX	3967	3612	3464	3632	4120
ENSG00000030066.9	chr11	8471	9779	10764	17194	17848
ENSG00000030110.8	chr6	2267	2980	2626	3185	2526
ENSG00000030304.8	chr9	4159	0	0	0	0
ENSG00000030419.12	chr2	12220	255	110	172	119
ENSG00000030582.12	chr17	3520	28961	31808	26428	33625
ENSG00000031003.6	chr5	6808	6169	5194	5382	4288
ENSG00000031081.6	chr3	9384	1180	1284	1366	902
ENSG00000031544.9	chr15	3503	12	6	6	24
ENSG00000031691.6	chr6	1733	5084	4843	7906	8139
ENSG00000031698.8	chr1	3836	19950	21149	27922	24161
ENSG00000031823.10	chr19	7445	5306	5066	6400	5604
ENSG00000032219.14	chr14	7568	1225	824	1769	1036
ENSG00000032389.8	chr2	5775	3041	2964	4333	3119
ENSG00000032444.11	chr19	7055	5922	6364	5311	5473
ENSG00000032742.13	chr13	5480	689	544	872	789
ENSG00000033011.7	chr16	5786	9692	9924	10253	9819
ENSG00000033030.9	chr12	7752	3554	2801	6045	5416
ENSG00000033050.3	chr7	4448	7735	8756	7649	7982
ENSG00000033100.10	chr7	4200	1392	1438	2928	2530
ENSG00000033122.13	chr1	12010	76	44	124	150
ENSG00000033170.12	chr14	6889	5509	3823	5537	4138
ENSG00000033178.7	chr4	8323	11434	8731	7258	8077
ENSG00000033327.8	chr11	6771	1628	1520	1940	1416
ENSG00000033627.10	chr17	10968	2337	2269	2527	3315
ENSG00000033800.9	chr15	4524	4997	3712	6152	4670
ENSG00000033867.12	chr3	9564	4480	4049	4440	4226
ENSG00000034053.10	chr15	6869	1938	2203	2604	2092
ENSG00000034063.9	chr19	5144	10017	9885	13170	10385
ENSG00000034152.14	chr17	3783	20486	18413	21795	19062
ENSG00000034239.6	chr8	5805	8	4	16	10
ENSG00000034510.4	chr2	492	158261	169393	197066	221151
ENSG00000034533.7	chr3	3427	1618	845	1553	1016
ENSG00000034677.7	chr8	6031	5738	3620	9380	4334
ENSG00000034693.10	chr6	2222	3386	3319	4085	3676
ENSG00000034713.3	chr16	3034	11650	10736	7503	7828
ENSG00000034971.9	chr1	2083	0	0	0	0
ENSG00000035115.17	chr2	11165	321	172	278	280
ENSG00000035141.3	chr2	3086	27002	25707	26714	28623
ENSG00000035403.12	chr10	5818	20296	26670	27249	29079
ENSG00000035499.8	chr5	3806	6651	6027	7140	6812
ENSG00000035664.7	chr15	7041	294	303	376	367
ENSG00000035681.3	chr8	6165	8470	7632	10293	10532
ENSG00000035687.9	chr1	3666	4190	4341	4799	4763
ENSG00000035720.3	chr4	1655	0	0	0	0
ENSG00000035862.8	chr17	5633	28228	27706	22376	32202
ENSG00000035928.10	chr4	6713	24315	19246	18616	15609
ENSG00000036054.8	chr3	5168	4183	4192	8337	7220
ENSG00000036257.8	chr2	11501	10266	8042	9995	10104
ENSG00000036448.5	chr8	7062	112	112	115	138
ENSG00000036473.5	chrX	1585	4	6	12	4
ENSG00000036530.4	chr14	9354	54	44	20	25
ENSG00000036549.8	chr1	9008	6845	4380	11215	7381
ENSG00000036565.10	chr8	3910	0	0	0	0
ENSG00000036672.11	chr11	4538	24	14	4	42
ENSG00000036828.9	chr3	5390	0	0	4	0
ENSG00000037042.8	chr17	2772	666	756	801	793
ENSG00000037241.3	chr5	1164	11456	9147	9160	7816
ENSG00000037280.11	chr5	8849	1445	1622	476	431
ENSG00000037474.10	chr5	5506	52839	51702	42958	38192
ENSG00000037637.6	chr1	8984	1878	1156	1971	910
ENSG00000037749.7	chr5	7213	5719	5403	6124	5401
ENSG00000037757.9	chr19	3456	1200	1395	1525	1717
ENSG00000037897.12	chr12	2621	3221	2699	3886	3000
ENSG00000037965.4	chr12	3371	3589	2971	3308	4032
ENSG00000038002.4	chr4	2675	1658	1764	2790	3209
ENSG00000038210.9	chr4	7332	2609	1900	1658	1924
ENSG00000038219.8	chr4	15860	4195	4080	4917	4413
ENSG00000038274.11	chr5	5153	6000	4908	5256	4298
ENSG00000038295.3	chr4	7522	24	9	52	36
ENSG00000038358.10	chr16	6173	5664	6706	6915	6567
ENSG00000038382.13	chr5	17500	69731	62411	57208	45441
ENSG00000038427.11	chr5	14831	12	4	40	56
ENSG00000038532.10	chr16	11944	5967	6357	5557	4913
ENSG00000038945.10	chr8	7812	0	2	0	0
ENSG00000039068.14	chr16	6154	824	816	186	209
ENSG00000039123.11	chr5	6578	16389	15511	18187	18595
ENSG00000039139.9	chr5	16475	1058	1193	1029	846
ENSG00000039319.12	chr5	11461	2984	2627	3385	3806
ENSG00000039523.13	chr16	6730	10417	10566	7998	10223
ENSG00000039537.9	chr5	4739	0	4	0	0
ENSG00000039560.9	chr5	7702	25181	27541	22159	23534
ENSG00000039600.6	chr5	3471	0	0	12	1
ENSG00000039650.5	chr19	3531	2377	2575	4070	4693
ENSG00000039987.2	chr19	2646	8	8	4	6
ENSG00000040199.14	chr16	12493	6432	4556	3094	2335
ENSG00000040275.12	chr5	4777	5599	4851	4146	4253
ENSG00000040341.13	chr8	8998	6588	6224	8368	8884
ENSG00000040487.8	chr1	2686	1890	1692	2078	1406
ENSG00000040531.10	chr17	3398	3244	3046	2969	2622
ENSG00000040608.9	chr22	3339	1468	1150	750	746
ENSG00000040633.8	chr17	2783	5194	3473	6685	4235
ENSG00000040731.6	chr5	3660	106	150	152	148
ENSG00000040933.10	chr2	9845	2739	2971	3440	3216
ENSG00000041353.5	chr18	7432	457	387	259	243
ENSG00000041357.11	chr15	3839	12534	11518	22725	23025
ENSG00000041515.11	chr13	8994	388	247	119	154
ENSG00000041802.6	chr3	4818	11420	11753	16083	15453
ENSG00000041880.10	chr3	2928	3829	3714	6010	6197
ENSG00000041982.10	chr9	8687	6829	9981	18894	25061
ENSG00000041988.11	chr1	4072	1553	1017	1099	658
ENSG00000042062.7	chr20	6009	16	2	10	16
ENSG00000042088.9	chr14	6221	2422	2075	2649	2533
ENSG00000042286.10	chr10	5131	5253	5584	9078	8704
ENSG00000042304.6	chr2	2087	0	0	0	0
ENSG00000042317.12	chr14	6872	1170	993	1474	1557
ENSG00000042429.6	chr11	10773	1409	1043	3903	2570
ENSG00000042445.9	chr2	4264	3741	4332	2936	3702
ENSG00000042493.11	chr2	2607	3348	3571	3496	3180
ENSG00000042753.7	chr19	1704	18864	17872	22111	21899
ENSG00000042781.8	chr1	20584	6	6	4	14
ENSG00000042813.3	chr7	2643	0	0	0	0
ENSG00000042832.7	chr8	11132	10	18	20	20
ENSG00000042980.8	chr8	9351	701	621	369	375
ENSG00000043039.5	chr11	4411	0	2	27	10
ENSG00000043093.9	chr3	8412	3368	2590	3730	3600
ENSG00000043143.16	chr5	9873	6087	5199	9536	5980
ENSG00000043355.6	chr13	3301	4	18	6	4
ENSG00000043462.7	chr5	7231	0	2	32	49
ENSG00000043514.11	chr1	3054	4549	3344	4787	4315
ENSG00000043591.4	chr10	2862	8	0	0	0
ENSG00000044012.3	chr1	597	0	0	0	0
ENSG00000044090.4	chr6	5628	2906	3046	4822	4436
ENSG00000044115.15	chr5	8830	31834	35901	32082	36039
ENSG00000044446.6	chrX	9112	2396	2257	2629	2229
ENSG00000044459.10	chr9	11167	1058	860	1355	1154
ENSG00000044524.6	chr3	6674	0	0	0	0
ENSG00000044574.7	chr9	3908	79633	82304	88822	89268
ENSG00000046604.8	chr18	6190	6688	8071	9624	10361
ENSG00000046647.9	chrX	2424	429	414	545	388
ENSG00000046651.10	chrX	5212	1508	1304	1781	2125
ENSG00000046653.10	chrX	5675	225	253	182	192
ENSG00000046774.9	chrX	1991	0	0	66	100
ENSG00000046889.14	chr8	12058	67	44	22	16
ENSG00000047056.10	chr10	5656	1429	1007	1657	1097
ENSG00000047188.11	chr5	10816	6335	6310	6916	7130
ENSG00000047230.10	chrX	5510	14	34	35	22
ENSG00000047249.12	chr8	5090	6019	6136	6634	6797
ENSG00000047315.10	chr4	5901	34923	33271	29914	29727
ENSG00000047346.8	chr15	7755	562	316	660	574
ENSG00000047365.7	chr4	12428	2279	1552	2457	1905
ENSG00000047410.8	chr1	10180	17988	19655	20522	24707
ENSG00000047457.9	chr3	7296	34	14	24	16
ENSG00000047578.8	chr16	9692	2547	2694	3360	3414
ENSG00000047579.15	chr6	3078	2660	2244	2784	2209
ENSG00000047597.5	chrX	5206	10	6	17	40
ENSG00000047617.10	chr12	6012	11443	12526	18593	16797
ENSG00000047621.7	chr12	4939	8500	7354	9765	8407
ENSG00000047634.10	chrX	5475	2915	3198	3403	3432
ENSG00000047644.13	chrX	7114	440	362	755	733
ENSG00000047648.17	chrX	8357	122	134	178	138
ENSG00000047662.4	chr4	6622	0	0	4	12
ENSG00000047849.17	chr3	14901	23080	27553	21978	25693
ENSG00000047932.9	chr6	5025	8477	6315	8347	7192
ENSG00000047936.6	chr6	7856	189	124	93	110
ENSG00000048028.7	chr11	5719	5395	6137	5555	6023
ENSG00000048052.16	chr7	11781	3555	3202	5028	3676
ENSG00000048140.13	chr5	5218	10484	10897	7101	7248
ENSG00000048162.15	chr5	2852	5975	5202	4595	3915
ENSG00000048342.11	chr4	7570	2428	2257	3412	3364
ENSG00000048392.7	chr8	5548	11167	9651	15007	13928
ENSG00000048405.5	chr7	5793	2132	1211	2817	1811
ENSG00000048462.6	chr16	1118	7	0	10	2
ENSG00000048471.9	chr16	11298	993	1082	1459	1197
ENSG00000048540.10	chr12	10268	30	20	25	33
ENSG00000048544.5	chr6	2110	4533	3906	4701	4144
ENSG00000048545.9	chr6	2317	0	0	0	0
ENSG00000048649.9	chr11	15740	4617	3150	5839	3902
ENSG00000048707.9	chr1	20346	4083	3827	3684	2389
ENSG00000048740.12	chr10	9863	230	246	280	283
ENSG00000048828.12	chr9	7296	38475	32669	30780	34730
ENSG00000048991.12	chr2	7898	3499	3509	4263	3949
ENSG00000049089.9	chr1	4151	576	639	1078	951
ENSG00000049130.9	chr12	6030	1097	934	1062	880
ENSG00000049167.9	chr5	4847	2086	1728	2844	2385
ENSG00000049192.10	chr5	8567	5140	3429	19918	8956
ENSG00000049239.8	chr1	9321	1055	1090	912	700
ENSG00000049245.8	chr1	2760	11290	10955	5816	6671
ENSG00000049246.10	chr1	8059	5056	4230	1452	1389
ENSG00000049247.9	chr1	1783	2	2	0	6
ENSG00000049249.4	chr1	2284	964	1066	470	467
ENSG00000049283.13	chr17	4642	140	114	79	65
ENSG00000049319.2	chr2	4647	0	8	26	0
ENSG00000049323.11	chr2	7329	2242	2350	1886	1790
ENSG00000049449.4	chr11	7225	18143	18201	14918	16325
ENSG00000049540.12	chr7	6542	0	2	0	0
ENSG00000049541.6	chr7	2197	7839	7495	8732	8097
ENSG00000049618.16	chr6	16334	4739	3724	4783	3599
ENSG00000049656.9	chr5	6557	59182	53273	73834	69317
ENSG00000049759.12	chr18	15717	13199	10695	17562	14209
ENSG00000049768.10	chrX	2578	16	10	6	8
ENSG00000049769.8	chrX	4162	138	108	174	119
ENSG00000049860.9	chr5	5067	9507	9039	7862	8065
ENSG00000049883.10	chr5	3637	1450	1332	1946	1617
ENSG00000050030.8	chrX	11759	54	38	18	30
ENSG00000050130.13	chr14	4350	10607	8512	14557	12142
ENSG00000050165.13	chr11	5059	6344	6505	7704	7410
ENSG00000050327.10	chr7	5818	8	4	2	0
ENSG00000050344.8	chr7	4249	0	0	0	0
ENSG00000050393.7	chr6	6057	4853	4413	4663	5148
ENSG00000050405.9	chr12	6317	27425	28097	24454	25020
ENSG00000050426.11	chr12	4400	10715	9480	8828	8647
ENSG00000050438.12	chr12	11415	956	1122	1259	1168
ENSG00000050555.13	chr9	7594	5771	6293	5313	5897
ENSG00000050628.16	chr1	9882	22	25	40	30
ENSG00000050730.11	chr4	3768	2	24	110	110
ENSG00000050748.12	chr5	8955	7994	7593	3749	4004
ENSG00000050767.11	chr5	3878	1	6	4	2
ENSG00000050820.12	chr16	8335	9333	7524	8139	4858
ENSG00000051009.6	chr11	4736	5342	4286	6077	5142
ENSG00000051108.10	chr16	4178	13899	9749	10667	7326
ENSG00000051128.14	chr19	3422	3900	3762	3266	2771
ENSG00000051180.12	chr15	2863	4389	3509	4979	4253
ENSG00000051341.9	chr3	9099	9061	6700	7823	6223
ENSG00000051382.4	chr3	6531	4892	3965	3687	3633
ENSG00000051523.6	chr16	3357	80	41	14	2
ENSG00000051596.5	chr5	3437	941	942	548	516
ENSG00000051620.6	chr6	10356	10852	10657	15306	13500
ENSG00000051825.10	chr12	10304	4513	3688	6144	6801
ENSG00000052126.10	chr12	12596	6636	5816	9654	7905
ENSG00000052344.11	chr16	3008	54	4	12	12
ENSG00000052723.7	chr1	5894	7268	5575	6978	6793
ENSG00000052749.9	chr10	6801	11967	15003	13018	13871
ENSG00000052795.8	chr4	10868	2732	1942	3074	1809
ENSG00000052802.8	chr4	2892	5884	3554	4920	4119
ENSG00000052841.10	chr11	11284	7906	7252	6216	6532
ENSG00000052850.5	chr11	5750	0	0	0	0
ENSG00000053108.12	chr5	6733	10	16	20	14
ENSG00000053254.11	chr14	11033	4977	3863	3825	2894
ENSG00000053328.8	chr6	1774	0	4	0	0
ENSG00000053371.8	chr1	1781	6222	6385	5478	4734
ENSG00000053372.4	chr1	2822	13217	11973	15975	12907
ENSG00000053438.7	chr20	1294	0	0	0	0
ENSG00000053501.8	chr19	2431	2007	1908	2155	2183
ENSG00000053524.7	chr3	20568	270	291	313	267
ENSG00000053702.10	chr12	2803	0	0	0	0
ENSG00000053747.11	chr18	13522	1492	1430	311	306
ENSG00000053770.7	chr14	4371	7801	7252	7251	6408
ENSG00000053900.6	chr4	7494	3053	2443	2931	3519
ENSG00000053918.11	chr11	3971	12	4	18	34
ENSG00000054116.7	chr1	3313	30355	27187	31587	27910
ENSG00000054118.9	chr1	4736	11595	11245	13699	13372
ENSG00000054148.13	chr9	1908	16642	17631	23952	19590
ENSG00000054179.7	chr9	2633	0	2	0	2
ENSG00000054219.9	chr2	9430	0	0	10	6
ENSG00000054267.16	chr1	11073	4048	1549	2971	1266
ENSG00000054277.8	chr1	3480	273	440	787	702
ENSG00000054282.11	chr1	5353	732	787	843	785
ENSG00000054356.9	chr2	8261	24049	26553	34640	36932
ENSG00000054392.8	chr1	4296	4661	5079	5416	5148
ENSG00000054523.12	chr1	17693	6349	5632	5427	4220
ENSG00000054598.5	chr6	3447	708	1162	752	1620
ENSG00000054611.9	chr22	5305	6431	6088	5061	4715
ENSG00000054654.11	chr14	31405	6234	5034	4255	4302
ENSG00000054690.9	chr14	10817	4149	4341	4298	5035
ENSG00000054793.9	chr20	8317	4327	4726	3275	2852
ENSG00000054796.8	chr20	1867	0	0	0	0
ENSG00000054803.3	chr20	3024	20	43	2	6
ENSG00000054938.11	chr11	3073	0	0	0	0
ENSG00000054965.6	chr11	7823	2930	2861	2846	2836
ENSG00000054967.8	chr11	6322	2067	1558	2571	1796
ENSG00000054983.12	chr14	6825	6133	6932	7409	7924
ENSG00000055044.6	chr2	3299	22821	21199	30022	31337
ENSG00000055070.12	chr1	4747	21662	23916	28998	25343
ENSG00000055118.10	chr7	7017	382	334	326	333
ENSG00000055130.11	chr7	3548	3811	3491	5206	4608
ENSG00000055147.13	chr5	6543	2255	2329	2628	2658
ENSG00000055163.14	chr5	10509	6572	7457	6762	7031
ENSG00000055208.13	chr6	5758	9076	9345	13126	12806
ENSG00000055211.8	chr6	2248	3887	3805	4827	6275
ENSG00000055332.11	chr2	10753	6109	4900	6925	7695
ENSG00000055483.14	chr17	10409	31889	25284	32348	24358
ENSG00000055609.13	chr7	22650	1890	1296	1864	1504
ENSG00000055732.8	chr1	6623	8	4	18	14
ENSG00000055813.5	chr2	3982	141	117	103	108
ENSG00000055917.11	chr2	6858	11889	7269	10430	8046
ENSG00000055950.12	chr10	3573	14720	14635	15230	12609
ENSG00000055955.11	chr3	5462	2	11	2	1
ENSG00000055957.6	chr3	4543	0	2	0	0
ENSG00000056050.6	chr4	1436	1082	1011	2109	2258
ENSG00000056097.11	chr5	6792	40612	36016	33068	29013
ENSG00000056277.11	chrX	4634	574	316	781	403
ENSG00000056291.13	chr4	2359	2898	2455	1750	1701
ENSG00000056487.11	chr22	5753	1717	1408	1398	1027
ENSG00000056558.6	chr9	6449	1680	1312	2632	1767
ENSG00000056586.11	chr9	11545	2816	2369	3064	2447
ENSG00000056661.9	chr17	3511	5007	4472	4283	4891
ENSG00000056736.5	chr3	3038	608	567	2116	2361
ENSG00000056972.14	chr6	6553	2252	2080	3027	2062
ENSG00000056998.14	chrX	3646	1834	1938	1342	1330
ENSG00000057019.11	chr3	11274	24345	18430	24338	25602
ENSG00000057149.10	chr18	1777	22	34	68	14
ENSG00000057252.8	chr1	7033	24095	24273	26215	27991
ENSG00000057294.9	chr12	6069	5121	5854	8131	7357
ENSG00000057468.6	chr1	3266	9	0	18	6
ENSG00000057593.9	chr13	3792	16	12	0	0
ENSG00000057608.11	chr10	3811	31895	32911	34663	41266
ENSG00000057657.10	chr6	6369	485	178	1156	299
ENSG00000057663.8	chr6	3924	7217	5854	9035	7838
ENSG00000057704.6	chr12	6515	76	49	232	113
ENSG00000057757.5	chr1	2186	7924	6252	8641	7102
ENSG00000057935.9	chr2	10580	6828	6519	7899	8548
ENSG00000058056.4	chr3	8440	5581	4536	5339	4710
ENSG00000058063.11	chr3	9196	6436	5661	6762	7024
ENSG00000058085.10	chr1	6543	18900	23725	10306	11654
ENSG00000058091.12	chr7	6841	3597	3431	3118	2670
ENSG00000058262.5	chr3	4697	67731	70451	45154	46969
ENSG00000058272.11	chr12	12490	5353	5033	6233	5366
ENSG00000058335.11	chr15	8683	5111	4870	8526	10916
ENSG00000058404.15	chr7	8159	96	84	111	153
ENSG00000058453.12	chr1	8871	1591	1318	1405	1194
ENSG00000058600.11	chr16	9454	6612	6137	7762	6331
ENSG00000058668.10	chr1	9721	1973	2153	2367	2188
ENSG00000058673.11	chr1	9700	7521	6337	8468	7657
ENSG00000058729.6	chr5	5502	3465	2406	4500	3653
ENSG00000058799.9	chr1	2259	4029	3879	3896	3768
ENSG00000058804.10	chr1	5135	14807	13547	13288	12937
ENSG00000058866.10	chr3	10978	470	401	2909	2219
ENSG00000059122.12	chr16	8413	2818	2557	3662	3466
ENSG00000059145.14	chr16	8504	5112	4726	6413	6134
ENSG00000059377.11	chr7	6271	295	284	462	378
ENSG00000059378.8	chr7	6285	3366	2791	3477	3427
ENSG00000059573.4	chr10	3756	12704	15978	12791	12494
ENSG00000059588.5	chr1	7743	1910	1633	962	1062
ENSG00000059691.7	chr4	11757	3945	4347	3661	3171
ENSG00000059728.6	chr2	6321	594	348	903	559
ENSG00000059758.3	chr12	6547	1894	1232	2586	1661
ENSG00000059769.15	chr9	3675	1068	711	833	740
ENSG00000059804.11	chr12	6159	12727	11999	14371	12238
ENSG00000059915.12	chr10	6327	531	674	495	378
ENSG00000060069.12	chr18	5296	6165	4824	6349	4305
ENSG00000060138.8	chr12	8615	38601	40534	39683	49821
ENSG00000060140.4	chr12	3424	2530	1797	2332	1794
ENSG00000060237.12	chr12	14370	19760	19497	19475	18132
ENSG00000060303.5	chr6	408	2	2	6	4
ENSG00000060339.9	chr10	6002	13363	13515	18060	19422
ENSG00000060491.11	chr20	4702	8576	9674	7563	7112
ENSG00000060558.3	chr19	2613	34	36	44	6
ENSG00000060566.9	chr19	2678	0	0	0	4
ENSG00000060642.6	chr1	3382	3271	3098	2457	2090
ENSG00000060656.15	chr1	6700	8103	7712	7181	7164
ENSG00000060688.8	chr1	4011	11094	9564	15181	13150
ENSG00000060709.9	chr12	8738	102	98	216	152
ENSG00000060718.14	chr1	8265	1026	1068	1520	1652
ENSG00000060749.10	chr11	10537	4873	4032	3330	3530
ENSG00000060762.14	chr6	1525	3082	2498	3056	3355
ENSG00000060971.13	chr3	7106	7945	9098	6350	4680
ENSG00000060982.10	chr12	10372	13805	10954	16791	18512
ENSG00000061273.13	chr12	9936	11485	10776	16374	15382
ENSG00000061337.11	chr8	5706	428	324	154	84
ENSG00000061455.9	chr5	3135	8	4	20	20
ENSG00000061492.7	chr5	2089	0	0	0	0
ENSG00000061656.5	chr20	2240	698	676	433	315
ENSG00000061676.9	chr2	6758	29792	29916	35871	41400
ENSG00000061794.8	chr12	1979	12910	11804	15138	14873
ENSG00000061918.8	chr4	3724	342	384	500	474
ENSG00000061936.5	chr12	10157	4285	3947	5646	4874
ENSG00000061938.12	chr3	11297	4043	3793	3709	3191
ENSG00000061987.10	chr12	13121	2911	2983	4544	4471
ENSG00000062038.9	chr16	5009	296	268	26	38
ENSG00000062096.10	chrX	2215	0	2	16	5
ENSG00000062194.11	chr5	6493	11644	6952	12193	8591
ENSG00000062282.10	chr11	7904	1418	1290	2055	1486
ENSG00000062370.12	chr19	3848	239	93	235	42
ENSG00000062485.14	chr12	6402	30905	32664	29876	34777
ENSG00000062524.11	chr15	3490	186	117	138	102
ENSG00000062582.9	chr7	2613	338	362	241	207
ENSG00000062598.13	chr20	6714	6729	6412	6064	5829
ENSG00000062650.13	chr10	7280	13032	9399	12623	10025
ENSG00000062716.6	chr17	6916	56707	44618	65110	52931
ENSG00000062725.5	chr17	9866	8517	7221	8793	7467
ENSG00000062822.8	chr19	4856	10813	11888	12483	12147
ENSG00000063015.15	chr17	5103	0	0	0	0
ENSG00000063046.13	chr12	6146	58296	61049	56273	53493
ENSG00000063127.11	chr19	3599	628	442	516	407
ENSG00000063169.6	chr19	7147	919	509	985	736
ENSG00000063176.11	chr19	6008	1402	1251	1619	1292
ENSG00000063177.8	chr19	4209	32392	34363	34982	35308
ENSG00000063180.4	chr19	2075	1938	1980	1753	1449
ENSG00000063241.3	chr19	4408	9698	10494	8732	8606
ENSG00000063244.8	chr19	4115	34697	40343	42686	39719
ENSG00000063245.10	chr19	3849	4985	5447	4774	6153
ENSG00000063322.9	chr19	3835	3826	4518	5831	5362
ENSG00000063438.12	chr5	7678	543	346	1061	692
ENSG00000063515.2	chr22	1033	0	0	0	0
ENSG00000063587.11	chrX	7670	170	186	262	148
ENSG00000063601.12	chrX	6332	582	732	719	788
ENSG00000063660.4	chr2	6514	20932	25603	19019	19669
ENSG00000063761.11	chr14	5317	1687	1709	1343	1235
ENSG00000063854.8	chr16	5052	5076	4925	5220	4472
ENSG00000063978.11	chr4	7276	7060	5355	9465	6982
ENSG00000064012.17	chr2	6808	2947	2792	5141	4768
ENSG00000064042.13	chr4	10862	2440	2197	8751	9095
ENSG00000064102.10	chr12	3345	11060	10589	12905	12937
ENSG00000064115.6	chr12	3888	21381	23125	25069	22879
ENSG00000064195.7	chr17	2715	0	0	0	0
ENSG00000064199.2	chr11	5205	2301	1931	1436	1406
ENSG00000064201.11	chr11	3793	0	0	4	0
ENSG00000064205.6	chr20	4981	54	34	6	12
ENSG00000064218.4	chr9	2387	116	82	34	22
ENSG00000064225.8	chr3	6288	762	548	739	738
ENSG00000064270.8	chr16	6693	22	26	84	62
ENSG00000064300.4	chr17	4150	246	222	188	222
ENSG00000064309.10	chr11	10600	711	600	1111	1084
ENSG00000064313.7	chr8	6547	11251	10364	16906	16553
ENSG00000064393.11	chr7	15220	6411	4364	5220	5308
ENSG00000064419.9	chr7	3933	6163	6114	7513	7889
ENSG00000064489.17	chr19	1931	6	4	6	2
ENSG00000064490.8	chr19	2533	2697	3015	3812	3111
ENSG00000064545.10	chr19	3281	2985	3316	3053	3002
ENSG00000064547.9	chr19	2980	536	494	382	468
ENSG00000064601.12	chr20	5856	24592	26277	20311	21957
ENSG00000064607.12	chr19	7744	11910	11126	14790	14815
ENSG00000064651.9	chr5	10664	4654	4464	5004	5563
ENSG00000064652.6	chr5	3550	3425	3236	3725	3272
ENSG00000064655.14	chr20	3618	664	672	307	234
ENSG00000064666.10	chr19	3928	8812	9378	7855	10922
ENSG00000064687.8	chr19	8365	498	484	301	337
ENSG00000064692.14	chr5	7325	44	52	282	318
ENSG00000064703.7	chr1	6019	8685	5049	9739	5843
ENSG00000064726.5	chr15	4169	12705	11303	17204	18093
ENSG00000064763.5	chr12	3868	658	556	1389	1492
ENSG00000064787.8	chr20	9024	32	6	0	4
ENSG00000064835.6	chr3	1569	0	0	0	0
ENSG00000064886.9	chr1	3295	333	323	218	226
ENSG00000064932.11	chr19	6476	5451	4795	7360	6035
ENSG00000064933.12	chr2	5152	2501	2174	2736	3008
ENSG00000064961.14	chr19	3857	11979	12200	10186	11091
ENSG00000064989.8	chr2	6144	18	0	154	138
ENSG00000064995.12	chr6	1580	6361	5087	6810	4872
ENSG00000064999.12	chr6	6766	1782	1788	2967	2158
ENSG00000065000.11	chr19	8618	20622	20063	17412	18159
ENSG00000065029.10	chr6	6789	1208	1197	1188	976
ENSG00000065054.9	chr16	3550	3174	2965	2672	2744
ENSG00000065057.3	chr16	1658	2660	2653	3159	2321
ENSG00000065060.12	chr6	9844	2546	2690	2997	2353
ENSG00000065135.7	chr1	3206	39896	35239	38065	35411
ENSG00000065150.14	chr13	9671	37720	43632	21674	26179
ENSG00000065154.7	chr10	3388	19117	20781	19229	16216
ENSG00000065183.10	chr1	4159	17412	17882	20723	19815
ENSG00000065243.14	chr1	7014	7096	7946	10932	10891
ENSG00000065268.6	chr19	2474	4355	4432	4789	4355
ENSG00000065308.4	chr6	6908	5782	4845	7712	6820
ENSG00000065320.4	chr17	6431	2428	2569	1959	1751
ENSG00000065325.7	chr17	6052	4846	5668	4768	4602
ENSG00000065328.12	chr10	5454	10992	9861	15043	14432
ENSG00000065357.15	chr12	10215	4893	4840	5507	5970
ENSG00000065361.10	chr12	8651	1795	2065	2039	2101
ENSG00000065371.13	chr3	4395	2	0	0	0
ENSG00000065413.12	chr2	9228	414	604	873	681
ENSG00000065427.10	chr16	3815	46257	48839	28647	32536
ENSG00000065457.6	chr16	4486	4129	4404	2900	2745
ENSG00000065485.13	chr3	4030	5788	5578	3863	3750
ENSG00000065491.8	chr6	3462	1895	1606	2149	1822
ENSG00000065518.7	chr3	1889	6752	6325	5525	7740
ENSG00000065526.6	chr1	13294	3591	2901	5997	4591
ENSG00000065534.14	chr3	22166	17957	18776	9754	9156
ENSG00000065548.13	chr2	3125	14960	15133	15984	17839
ENSG00000065559.10	chr17	5714	4065	3688	6086	5254
ENSG00000065600.8	chr1	2914	1996	2062	2570	2034
ENSG00000065609.10	chr6	6657	290	235	134	139
ENSG00000065613.9	chr10	7974	8150	7421	7655	6928
ENSG00000065615.8	chr6	5730	2529	2452	2483	2677
ENSG00000065618.12	chr10	6426	2398	2832	1889	2318
ENSG00000065621.9	chr10	5257	4635	3788	3852	3134
ENSG00000065665.16	chr10	3916	2292	2199	1886	1680
ENSG00000065675.10	chr10	3285	2001	1476	2515	2200
ENSG00000065717.10	chr19	4038	2871	3072	2106	1944
ENSG00000065802.7	chr2	7410	8293	7008	7258	5441
ENSG00000065809.9	chr10	7019	6738	6452	7183	6634
ENSG00000065833.7	chr6	3378	4091	3964	6402	7103
ENSG00000065882.11	chr4	9027	10868	10853	8769	9256
ENSG00000065883.10	chr7	8921	5596	3925	4767	3488
ENSG00000065911.7	chr2	4870	44686	40418	60338	51735
ENSG00000065923.5	chrX	3838	1568	1467	1950	1868
ENSG00000065970.4	chr12	6296	5594	4503	4634	3892
ENSG00000065978.13	chr1	1930	122651	145756	134601	152088
ENSG00000065989.11	chr19	6644	2643	2238	3034	2835
ENSG00000066027.6	chr1	3819	3142	2720	3403	3696
ENSG00000066032.14	chr2	7538	33	38	48	67
ENSG00000066044.9	chr19	6956	11412	10564	11173	11006
ENSG00000066056.9	chr1	6694	48	72	301	231
ENSG00000066084.8	chr12	10361	5961	6649	8082	6529
ENSG00000066117.10	chr12	5136	11486	11492	14810	14856
ENSG00000066135.8	chr1	5172	6802	5885	8750	7207
ENSG00000066136.15	chr1	5990	8476	7518	7746	7335
ENSG00000066185.8	chr1	2195	20	22	44	18
ENSG00000066230.6	chr5	2783	0	0	14	0
ENSG00000066248.10	chr2	4687	293	402	433	373
ENSG00000066279.12	chr1	10887	6930	6289	7763	7922
ENSG00000066294.10	chr1	9255	0	0	0	0
ENSG00000066322.8	chr1	2458	24812	26997	29951	26105
ENSG00000066336.7	chr11	2069	10	0	2	2
ENSG00000066379.10	chr6	3672	720	654	1094	718
ENSG00000066382.12	chr11	8198	170	156	107	90
ENSG00000066405.8	chr3	3877	0	0	0	0
ENSG00000066422.4	chr3	7416	3050	2262	3924	3126
ENSG00000066427.17	chr14	8470	3382	2558	2742	2846
ENSG00000066455.8	chr14	3295	3131	2600	3959	3671
ENSG00000066468.16	chr10	7543	2110	1662	1062	951
ENSG00000066557.5	chr1	2884	4341	4906	6733	8040
ENSG00000066583.7	chr5	1940	7475	6827	10526	9159
ENSG00000066629.12	chr14	8899	1570	1848	2009	2187
ENSG00000066651.12	chr6	3205	1376	1254	2048	2137
ENSG00000066654.8	chr16	5092	3103	2274	3303	3040
ENSG00000066697.10	chr9	2763	9150	8757	17046	17194
ENSG00000066735.10	chr14	6756	1004	954	996	825
ENSG00000066739.7	chr14	12722	1634	1392	1651	1677
ENSG00000066777.4	chr8	10970	9103	8029	10311	9338
ENSG00000066813.10	chr16	8155	0	0	0	0
ENSG00000066827.11	chr8	8900	866	619	804	583
ENSG00000066855.11	chr8	4629	4002	3795	3944	3805
ENSG00000066923.13	chr7	8583	57	53	70	87
ENSG00000066926.6	chr18	4473	2845	2966	3394	3462
ENSG00000066933.11	chr15	20250	2483	1965	2554	2109
ENSG00000067048.12	chrY	5738	0	2	0	0
ENSG00000067057.11	chr10	4737	12359	14550	16969	18312
ENSG00000067064.6	chr10	3589	5158	3726	3064	2777
ENSG00000067066.12	chr2	12691	4334	4195	7392	7190
ENSG00000067082.10	chr10	6139	6736	2856	7207	2763
ENSG00000067113.12	chr5	2016	1793	1590	2158	1718
ENSG00000067141.12	chr15	8117	3422	4215	3739	4193
ENSG00000067167.3	chr8	3878	14153	14880	17731	18048
ENSG00000067177.10	chrX	6350	1510	1886	2217	2647
ENSG00000067182.3	chr12	4005	11291	8965	14171	10627
ENSG00000067191.11	chr17	7094	1363	995	1235	891
ENSG00000067208.10	chr1	8276	1000	705	1012	783
ENSG00000067221.9	chr15	6178	910	1168	956	724
ENSG00000067225.13	chr15	8572	437189	551829	649569	718288
ENSG00000067248.5	chr5	4728	8413	8483	9496	9925
ENSG00000067334.9	chr1	5985	12552	10954	16459	18715
ENSG00000067365.10	chr16	4824	7981	7227	7447	6760
ENSG00000067369.9	chr15	8843	8025	7944	11384	9848
ENSG00000067445.15	chrX	6716	3457	3511	3445	3237
ENSG00000067533.5	chr1	7883	7974	6784	9203	9131
ENSG00000067560.6	chr3	2582	54989	60770	46312	47706
ENSG00000067596.6	chr17	9302	5370	4752	7145	5744
ENSG00000067601.6	chr7	1327	384	232	445	422
ENSG00000067606.11	chr1	7636	4194	3792	4483	3697
ENSG00000067646.7	chrY	5737	0	0	0	0
ENSG00000067704.8	chr1	4162	34143	33695	33446	35751
ENSG00000067715.9	chr12	6494	311	142	496	631
ENSG00000067798.9	chr12	11179	4743	2931	5110	3363
ENSG00000067829.13	chrX	2686	1976	2182	3789	5711
ENSG00000067836.8	chr16	3683	1392	1524	1750	1832
ENSG00000067840.7	chrX	4386	488	420	505	642
ENSG00000067842.13	chrX	7534	8	24	2	2
ENSG00000067900.5	chr18	8230	7257	7166	10569	11852
ENSG00000067955.9	chr16	4129	6629	4782	5580	5128
ENSG00000067992.8	chrX	2695	1822	2218	1974	2386
ENSG00000068001.9	chr3	4545	409	458	355	285
ENSG00000068024.12	chr2	13443	24	28	66	72
ENSG00000068028.13	chr3	3677	2102	1827	1799	1592
ENSG00000068078.13	chr4	4834	747	658	507	391
ENSG00000068079.3	chr17	1973	554	534	3719	2450
ENSG00000068097.10	chr17	4866	7309	5990	7217	5155
ENSG00000068120.10	chr17	4032	21246	22450	20177	23086
ENSG00000068137.10	chr17	4839	1578	1560	2466	2442
ENSG00000068305.13	chr15	7030	4561	4153	8607	7394
ENSG00000068308.9	chrX	3329	2461	2840	3470	3226
ENSG00000068323.11	chrX	4278	2218	2597	3401	3375
ENSG00000068354.10	chrX	4223	921	999	964	742
ENSG00000068366.14	chrX	6181	15315	15195	9174	9822
ENSG00000068383.14	chr10	3701	4474	4188	4895	4316
ENSG00000068394.9	chrX	1735	1506	1500	1836	1816
ENSG00000068400.9	chrX	5779	1739	1656	1982	2542
ENSG00000068438.10	chrX	2740	8888	11208	8691	9885
ENSG00000068489.8	chr17	4080	12351	16922	13909	14341
ENSG00000068615.12	chr2	5326	743	572	130	76
ENSG00000068650.14	chr13	12172	6328	7557	6270	6399
ENSG00000068654.11	chr2	13519	6060	7330	8455	7490
ENSG00000068697.6	chr2	1946	59146	59514	63839	59728
ENSG00000068724.11	chr2	6949	1735	1758	2750	1754
ENSG00000068745.10	chr3	5624	14887	11527	16846	13808
ENSG00000068781.16	chr2	4294	0	0	0	0
ENSG00000068784.8	chr2	5045	4532	3822	4285	4196
ENSG00000068793.13	chr15	10435	12806	12832	13040	13911
ENSG00000068796.12	chr5	4774	11411	10542	14508	13953
ENSG00000068831.14	chr11	6084	106	87	156	170
ENSG00000068878.10	chr2	10259	17951	15208	16338	17119
ENSG00000068885.10	chr3	7175	1408	1588	1224	1403
ENSG00000068903.15	chr19	6204	2447	2846	2772	2786
ENSG00000068912.9	chr2	2592	7859	6792	8163	7275
ENSG00000068971.9	chr11	3376	1525	1596	1330	969
ENSG00000068976.9	chr11	4981	233	147	180	124
ENSG00000068985.4	chrX	665	0	0	0	0
ENSG00000069011.11	chr5	3511	1675	1766	1469	1190
ENSG00000069018.13	chr5	3608	0	0	0	0
ENSG00000069020.14	chr5	14697	2005	1266	3712	1991
ENSG00000069122.14	chr6	6717	41	30	78	92
ENSG00000069188.12	chr17	11607	1993	1889	918	704
ENSG00000069206.11	chr8	4483	0	0	0	4
ENSG00000069248.8	chr1	5057	7878	7956	6107	6530
ENSG00000069275.12	chr1	6546	29228	26846	31898	28760
ENSG00000069329.11	chr16	9723	23498	23736	18248	20008
ENSG00000069345.7	chr16	5039	20482	19641	19284	15118
ENSG00000069399.8	chr19	3242	643	686	620	751
ENSG00000069424.10	chr1	9253	1670	1776	2674	2830
ENSG00000069431.6	chr12	11421	1416	1687	3850	2954
ENSG00000069482.6	chr11	1300	14	0	0	0
ENSG00000069493.9	chr12	3479	419	233	480	400
ENSG00000069509.5	chrX	1399	2581	2228	2668	2411
ENSG00000069535.11	chrX	3050	1102	1205	184	223
ENSG00000069667.11	chr15	17033	1326	1157	1020	1175
ENSG00000069696.6	chr11	1477	78	98	44	80
ENSG00000069702.6	chr1	8654	968	690	1002	944
ENSG00000069712.9	chr1	4623	173	126	202	176
ENSG00000069764.5	chr16	1113	4	12	3	20
ENSG00000069812.7	chr1	5407	0	10	17	0
ENSG00000069849.6	chr3	2584	36039	33178	18545	20108
ENSG00000069869.11	chr15	9097	2963	2982	3965	4010
ENSG00000069943.5	chr15	4539	1063	870	1149	882
ENSG00000069956.7	chr15	5281	9118	8106	14820	11646
ENSG00000069966.14	chr15	7487	3698	3991	5149	5790
ENSG00000069974.11	chr15	5603	1889	1849	2306	2139
ENSG00000069998.8	chr22	4936	9666	9870	5708	4834
ENSG00000070010.13	chr22	8705	20645	20719	23010	23771
ENSG00000070018.4	chr12	10337	13921	12631	15392	12336
ENSG00000070019.3	chr12	4167	0	0	0	0
ENSG00000070031.3	chr11	366	9	4	1	0
ENSG00000070047.7	chr11	5769	2944	2646	3934	2386
ENSG00000070061.10	chr9	6048	5126	5627	6821	6799
ENSG00000070081.11	chr11	8993	11852	12012	8261	10231
ENSG00000070087.9	chr3	3440	51730	48004	59084	48828
ENSG00000070159.9	chr9	10071	3726	3374	4579	3656
ENSG00000070182.13	chr14	14771	2322	2364	2062	1715
ENSG00000070190.8	chr4	4548	4	0	2	0
ENSG00000070193.4	chr5	3011	0	12	6	4
ENSG00000070214.11	chr9	12613	5089	5622	7590	7879
ENSG00000070269.9	chr14	8077	960	827	683	535
ENSG00000070366.8	chr17	11060	2987	2815	3234	2929
ENSG00000070367.11	chr14	9269	13878	15212	14608	15598
ENSG00000070371.11	chr22	9843	1132	963	454	428
ENSG00000070388.7	chr19	2110	0	0	0	0
ENSG00000070404.5	chr19	3144	10719	11098	9533	9079
ENSG00000070413.13	chr22	5535	4038	4406	2482	1938
ENSG00000070423.13	chr19	3677	6045	5683	6518	5847
ENSG00000070444.9	chr17	6328	1710	1418	1724	1726
ENSG00000070476.10	chr3	7357	2843	2131	2093	1845
ENSG00000070495.10	chr17	5949	5977	5174	6410	4927
ENSG00000070501.7	chr8	4106	3546	3123	3981	4332
ENSG00000070526.10	chr17	3448	0	0	0	4
ENSG00000070540.8	chr17	3402	2817	3007	2998	2136
ENSG00000070601.5	chr9	6724	60	70	72	108
ENSG00000070610.10	chr9	5079	16385	14747	13760	11963
ENSG00000070614.10	chr5	9043	17259	18470	15757	13837
ENSG00000070669.12	chr7	4455	6039	5855	8091	10040
ENSG00000070718.7	chr8	6276	6200	6229	8402	7758
ENSG00000070729.9	chr16	6039	187	151	93	83
ENSG00000070731.5	chr17	7558	0	0	2	0
ENSG00000070748.13	chr10	3100	0	0	2	0
ENSG00000070756.9	chr8	4752	264191	302719	363824	532973
ENSG00000070759.12	chr1	3460	283	316	471	380
ENSG00000070761.3	chr16	2371	13577	11523	12178	11948
ENSG00000070770.4	chr16	6905	18617	13377	10255	9949
ENSG00000070778.8	chr14	7396	2756	2304	4747	3482
ENSG00000070785.12	chr1	3043	11920	11061	12541	11395
ENSG00000070808.11	chr5	6150	4	10	4	8
ENSG00000070814.13	chr5	11278	13183	16055	12988	13485
ENSG00000070831.11	chr1	3470	26940	26446	32844	32902
ENSG00000070882.8	chr7	8100	5244	4922	5017	5196
ENSG00000070886.6	chr1	5358	480	434	256	208
ENSG00000070915.5	chr16	6180	22	27	48	59
ENSG00000070950.5	chr3	6983	3101	3433	4699	4756
ENSG00000070961.10	chr12	9491	7156	5973	7612	6919
ENSG00000070985.9	chr11	3962	0	0	2	6
ENSG00000071051.9	chr2	2990	5910	5937	8176	6635
ENSG00000071054.11	chr2	11918	17019	18116	18955	19112
ENSG00000071073.7	chr2	9630	955	850	1100	1004
ENSG00000071082.6	chr2	5791	265205	233439	314527	304567
ENSG00000071127.12	chr4	7827	23830	26408	27391	26687
ENSG00000071189.17	chr7	16417	2945	2622	3694	3236
ENSG00000071203.5	chr11	1839	196	164	64	86
ENSG00000071205.7	chr4	10759	2669	2205	3010	2376
ENSG00000071242.7	chr6	8243	1125	1431	1183	1101
ENSG00000071243.11	chr7	5214	1591	1322	2369	1867
ENSG00000071246.6	chr14	6498	944	842	1102	878
ENSG00000071282.7	chr3	2578	1132	821	861	520
ENSG00000071462.7	chr7	7944	13631	14379	13762	12313
ENSG00000071537.9	chr14	9559	9897	9024	10735	10816
ENSG00000071539.9	chr5	3560	8400	7793	15708	15022
ENSG00000071553.12	chrX	4884	3344	3522	7834	8176
ENSG00000071564.10	chr19	6061	16123	16112	13976	12152
ENSG00000071575.7	chr2	4588	3514	2324	2985	2217
ENSG00000071626.12	chr19	9272	17496	18189	18759	17010
ENSG00000071655.12	chr19	4689	5853	6134	5935	5283
ENSG00000071677.1	chr2	264	0	0	0	0
ENSG00000071794.11	chr3	6024	11139	9825	5757	6447
ENSG00000071859.10	chrX	2567	3158	3057	5506	5281
ENSG00000071889.12	chrX	6240	665	614	1184	916
ENSG00000071894.10	chr8	6096	13907	16071	10619	11417
ENSG00000071909.14	chr2	8236	18	6	2	16
ENSG00000071967.7	chr2	5176	3871	3667	4614	4907
ENSG00000071991.4	chr18	6864	0	0	42	14
ENSG00000071994.6	chr6	6476	15841	15912	16210	16716
ENSG00000072041.12	chr12	8556	3559	2900	3000	3104
ENSG00000072042.8	chr14	5518	21357	19851	21510	19039
ENSG00000072062.9	chr19	6144	5163	5902	4707	5302
ENSG00000072071.12	chr19	6292	5713	5505	4453	4206
ENSG00000072080.6	chr2	1265	10	0	10	4
ENSG00000072110.9	chr14	10626	57884	67160	62704	69708
ENSG00000072121.11	chr14	15706	10170	8396	11393	8637
ENSG00000072133.6	chrX	2890	439	321	558	631
ENSG00000072134.11	chr17	9844	9255	8111	11344	9903
ENSG00000072135.8	chr2	5774	8153	8546	7013	6699
ENSG00000072163.14	chr2	8487	439	453	262	377
ENSG00000072182.8	chr2	5250	36	40	26	10
ENSG00000072195.10	chr2	17910	5495	4809	10413	8230
ENSG00000072201.9	chr4	5725	290	369	316	228
ENSG00000072210.14	chr17	6457	4656	5323	8518	8908
ENSG00000072274.8	chr3	7887	45892	55872	46715	55238
ENSG00000072310.12	chr17	8039	14822	13467	18164	18033
ENSG00000072315.3	chrX	5839	0	0	0	0
ENSG00000072364.8	chr5	11297	12720	11859	14885	13042
ENSG00000072401.10	chr10	3486	6935	5160	6912	7211
ENSG00000072415.4	chr14	8743	23762	17760	22286	17864
ENSG00000072422.12	chr10	4841	2026	1748	2369	1928
ENSG00000072444.10	chr10	2055	0	2	0	2
ENSG00000072501.12	chrX	10682	4968	7183	6628	8483
ENSG00000072506.8	chrX	1115	11977	12010	14650	13021
ENSG00000072518.16	chr11	6154	3534	2654	4816	4247
ENSG00000072571.14	chr5	3966	17449	17752	9888	10810
ENSG00000072609.13	chr12	9214	1443	1284	951	1000
ENSG00000072657.4	chr12	6835	2099	2032	1605	1441
ENSG00000072682.14	chr5	8502	10104	10586	9449	9217
ENSG00000072694.14	chr1	6996	0	0	0	0
ENSG00000072736.14	chr16	8806	1645	1282	1511	845
ENSG00000072756.12	chr3	5518	2918	2728	3421	3885
ENSG00000072778.15	chr17	4865	41741	44965	42537	40879
ENSG00000072786.8	chr5	9083	3901	4089	3209	2772
ENSG00000072803.13	chr5	5577	7099	6286	5042	4302
ENSG00000072818.7	chr17	7421	648	695	709	569
ENSG00000072832.10	chr4	5823	2344	2516	2899	2750
ENSG00000072840.8	chr4	7923	2312	2305	1783	1414
ENSG00000072849.6	chr17	6386	7189	5233	6934	5794
ENSG00000072858.6	chr3	8072	16	26	110	62
ENSG00000072864.8	chr16	8035	3007	2301	3561	2567
ENSG00000072952.14	chr11	7702	4	0	8	10
ENSG00000072954.2	chr19	3005	2237	2834	1186	1206
ENSG00000072958.4	chr19	3813	8158	9464	9230	8270
ENSG00000073008.10	chr19	3519	7978	9116	7051	6413
ENSG00000073009.8	chrX	7462	320	362	821	558
ENSG00000073050.7	chr19	3459	1807	1975	1822	1725
ENSG00000073060.11	chr12	8240	17114	18287	13466	16522
ENSG00000073067.9	chr7	2773	0	0	0	0
ENSG00000073111.9	chr3	4899	37375	42826	34958	32150
ENSG00000073146.11	chr22	6872	32	16	57	74
ENSG00000073150.9	chr22	3102	1343	1358	1752	2019
ENSG00000073169.9	chr22	2363	3534	3278	2107	1793
ENSG00000073282.8	chr3	7454	0	0	6	6
ENSG00000073331.13	chr4	12325	2374	1890	2083	1773
ENSG00000073350.9	chr17	7909	2122	2108	253	204
ENSG00000073417.10	chr15	7886	2798	2515	5453	5375
ENSG00000073464.7	chrX	6750	1147	1212	1348	1052
ENSG00000073536.13	chr17	5463	6142	6516	8605	7445
ENSG00000073578.12	chr5	8383	10555	10432	20797	20378
ENSG00000073584.14	chr17	11023	3760	4032	4889	5372
ENSG00000073598.5	chr17	1388	2	0	0	8
ENSG00000073605.14	chr17	5917	1253	1047	691	859
ENSG00000073614.7	chr12	12091	6410	5835	9563	7147
ENSG00000073670.9	chr17	4770	1530	1466	1594	1675
ENSG00000073711.6	chr3	7839	4445	3403	3681	3038
ENSG00000073712.9	chr14	8510	8969	8678	11109	10093
ENSG00000073734.8	chr2	5151	0	0	0	0
ENSG00000073737.12	chr2	3751	62	100	70	44
ENSG00000073754.5	chr1	2456	8	0	22	10
ENSG00000073756.7	chr1	5269	74	124	176	432
ENSG00000073792.11	chr3	4735	11854	13039	15438	18058
ENSG00000073803.9	chr3	12623	3252	3500	4676	5212
ENSG00000073849.10	chr3	9151	677	414	807	555
ENSG00000073861.2	chr17	2614	0	0	42	16
ENSG00000073905.8	chrX	848	155	123	146	216
ENSG00000073910.15	chr13	16059	332	230	274	203
ENSG00000073921.13	chr11	5833	7695	7606	15799	16194
ENSG00000073969.14	chr17	5009	8661	8654	9365	10204
ENSG00000074047.16	chr2	7341	1773	1578	1580	983
ENSG00000074054.13	chr2	11099	5954	5202	6975	6616
ENSG00000074071.9	chr16	1097	29558	28448	34374	29763
ENSG00000074181.4	chr19	8799	1698	1809	1209	1301
ENSG00000074201.4	chr11	4592	28037	26579	29520	27615
ENSG00000074211.9	chr4	9198	4030	4470	4757	4557
ENSG00000074219.9	chr19	2980	1168	1191	1896	1520
ENSG00000074266.13	chr11	7016	6198	4241	9487	8262
ENSG00000074276.6	chr5	5348	0	2	0	0
ENSG00000074317.6	chr5	1979	211	274	316	276
ENSG00000074319.8	chr11	3839	7358	6166	5747	5221
ENSG00000074356.12	chr17	5717	4914	4869	6474	5941
ENSG00000074370.13	chr17	6866	575	730	424	379
ENSG00000074410.9	chr15	7313	2742	3256	4720	5207
ENSG00000074416.9	chr3	10056	14509	16548	12513	12613
ENSG00000074527.7	chr12	4166	639	678	764	661
ENSG00000074582.8	chr2	3379	5918	5701	7401	6973
ENSG00000074590.9	chr12	7008	6789	4572	7351	3878
ENSG00000074603.14	chr15	10211	3482	2985	4338	3937
ENSG00000074621.9	chr15	9084	1003	912	1033	1212
ENSG00000074657.9	chr18	11951	6635	7309	9537	8961
ENSG00000074660.11	chr17	4957	16	36	729	624
ENSG00000074695.5	chr18	6767	12016	13171	13047	14829
ENSG00000074696.8	chr15	4469	33324	36016	38184	39783
ENSG00000074706.9	chr6	8474	2	0	5	4
ENSG00000074755.10	chr17	15878	3265	2895	3596	3049
ENSG00000074771.3	chr6	2042	8	0	0	0
ENSG00000074800.9	chr1	3958	349809	411752	287294	301394
ENSG00000074803.13	chr15	12476	0	0	0	0
ENSG00000074842.3	chr19	1678	17108	16643	17008	13101
ENSG00000074855.6	chr19	4979	1096	1289	1533	1555
ENSG00000074935.9	chr6	6973	720	692	1166	1114
ENSG00000074964.12	chr1	7847	3587	2958	2126	1163
ENSG00000074966.6	chr4	3472	24	12	34	52
ENSG00000075035.5	chr12	6557	0	6	2	4
ENSG00000075043.12	chr20	4494	772	753	241	184
ENSG00000075073.10	chr10	2871	2	0	8	1
ENSG00000075089.5	chr12	3813	1652	1244	1711	1721
ENSG00000075131.5	chr15	2755	5951	4874	7157	6500
ENSG00000075142.9	chr7	4237	20379	18159	22442	21762
ENSG00000075151.15	chr1	8353	2971	3050	3968	4045
ENSG00000075188.4	chr12	2406	12597	11077	11102	9102
ENSG00000075213.5	chr7	6805	322	344	2031	1972
ENSG00000075218.14	chr22	4242	12878	13088	10273	8633
ENSG00000075223.9	chr7	6268	1358	1700	2576	2402
ENSG00000075234.12	chr22	3578	1591	1620	1383	1317
ENSG00000075239.9	chr11	5584	9103	8581	10351	9965
ENSG00000075240.12	chr22	4886	1156	921	787	630
ENSG00000075275.12	chr22	12817	102	68	153	161
ENSG00000075290.7	chr10	2112	2	6	16	1
ENSG00000075292.14	chr2	14127	11658	10416	14335	14048
ENSG00000075303.8	chr7	5081	2233	1839	2173	2081
ENSG00000075336.7	chr18	3640	15747	13985	15044	12564
ENSG00000075340.17	chr2	9262	0	2	10	4
ENSG00000075388.2	chr11	1220	0	0	2	0
ENSG00000075391.12	chr1	11818	5197	4708	6722	5284
ENSG00000075399.8	chr16	3428	4775	4421	2809	2784
ENSG00000075407.12	chr10	7430	3090	2821	2680	3102
ENSG00000075413.13	chr14	8891	5463	4740	7487	6869
ENSG00000075415.8	chr12	4685	40967	42137	46382	48485
ENSG00000075420.8	chr3	13299	1799	1359	2004	1664
ENSG00000075426.7	chr2	7157	12703	8226	13394	7757
ENSG00000075429.4	chr17	1632	0	4	0	2
ENSG00000075461.5	chr17	3380	0	0	0	0
ENSG00000075539.9	chr4	18170	8120	7042	7647	6722
ENSG00000075568.12	chr2	12991	4939	4724	5174	5959
ENSG00000075618.13	chr7	3707	5878	7062	21771	27208
ENSG00000075624.9	chr7	3256	225568	258445	218843	297666
ENSG00000075643.5	chr18	6281	1747	1740	2380	1918
ENSG00000075651.11	chr3	9953	906	717	1125	1017
ENSG00000075673.7	chr13	3732	102	88	116	128
ENSG00000075702.11	chr19	7156	5452	5081	5096	5236
ENSG00000075711.16	chr3	11001	7845	7266	9235	7505
ENSG00000075785.8	chr3	2717	39196	40339	30471	26488
ENSG00000075790.6	chr7	8409	6835	6665	9076	12309
ENSG00000075826.12	chr10	8360	2228	2206	1470	1775
ENSG00000075856.7	chr12	7270	6048	5042	7476	6190
ENSG00000075884.8	chr2	7743	0	4	22	50
ENSG00000075886.10	chr2	1598	190	174	281	189
ENSG00000075891.17	chr10	6243	553	415	464	425
ENSG00000075914.8	chr3	4442	8777	7447	8637	5909
ENSG00000075945.8	chr1	5014	2544	2206	2543	3324
ENSG00000075975.11	chr3	2848	5647	5300	5749	4412
ENSG00000076003.4	chr2	4118	37545	37609	34512	36174
ENSG00000076043.5	chr11	3699	17291	15290	12516	12567
ENSG00000076053.6	chr11	7885	2729	1541	2073	1445
ENSG00000076067.7	chr12	3570	2326	2282	3090	3262
ENSG00000076108.7	chr12	10918	14023	14551	17572	15881
ENSG00000076201.10	chr3	5981	6965	7351	5751	6952
ENSG00000076242.10	chr3	3748	12635	11545	9574	9900
ENSG00000076248.6	chr12	2567	8726	8553	10959	10208
ENSG00000076258.5	chr1	2517	298	400	272	220
ENSG00000076321.6	chr1	4254	2133	2155	3907	2685
ENSG00000076344.11	chr16	4798	0	0	0	0
ENSG00000076351.8	chr17	7951	182	206	318	324
ENSG00000076356.6	chr1	13781	429	622	1153	871
ENSG00000076382.11	chr17	4109	13266	16914	15304	16777
ENSG00000076513.12	chr12	7350	5220	6063	5138	5151
ENSG00000076554.11	chr8	8341	19664	20556	20186	24164
ENSG00000076555.11	chr12	14159	682	579	532	400
ENSG00000076604.10	chr17	4594	15178	12356	20687	14371
ENSG00000076641.4	chr8	11023	512	358	543	339
ENSG00000076650.2	chr19	4488	957	914	1429	954
ENSG00000076662.5	chr19	2950	237	250	334	207
ENSG00000076685.14	chr10	7320	7529	7997	6779	6103
ENSG00000076706.10	chr11	7420	38349	43362	29057	26535
ENSG00000076716.7	chrX	5057	1610	1502	1414	1534
ENSG00000076770.10	chrX	12199	258	199	721	715
ENSG00000076826.5	chr19	4845	660	557	785	547
ENSG00000076864.15	chr1	5650	865	1001	987	900
ENSG00000076924.7	chr19	4673	6106	7066	7768	7636
ENSG00000076928.13	chr19	8630	2912	3050	3977	3958
ENSG00000076944.10	chr19	5301	2575	2801	3030	3126
ENSG00000076984.13	chr19	5145	5265	5642	6036	5523
ENSG00000077009.9	chr19	1141	2	2	0	0
ENSG00000077044.5	chr2	9441	9801	8165	14272	11823
ENSG00000077063.6	chr7	7035	210	160	316	276
ENSG00000077080.5	chr7	2389	0	4	0	0
ENSG00000077092.14	chr3	3697	124	94	115	72
ENSG00000077097.9	chr3	5965	14620	13003	8898	10499
ENSG00000077147.10	chr10	7095	40942	36800	25984	26242
ENSG00000077150.13	chr10	4479	26393	28088	29211	30831
ENSG00000077152.5	chr1	1065	9789	8440	10808	9711
ENSG00000077157.15	chr1	14400	1278	1238	1290	1280
ENSG00000077232.11	chr2	6729	23912	24596	26599	30782
ENSG00000077235.13	chr16	11562	5480	6273	6782	6444
ENSG00000077238.9	chr16	6091	1978	1640	2236	1496
ENSG00000077254.10	chr1	6918	4001	4123	6200	6265
ENSG00000077264.9	chrX	3896	797	898	664	497
ENSG00000077274.7	chrX	3568	36	28	240	263
ENSG00000077279.12	chrX	10139	0	4	0	0
ENSG00000077312.4	chr19	2361	5504	5937	5741	5709
ENSG00000077327.11	chr10	4006	6	0	0	2
ENSG00000077348.4	chr19	1488	3826	4318	4822	3995
ENSG00000077380.11	chr2	4695	13079	13699	14906	15331
ENSG00000077420.11	chr10	3981	2	0	12	0
ENSG00000077454.11	chr7	8954	4706	4593	4024	4379
ENSG00000077458.8	chr11	6042	1797	1050	2696	1890
ENSG00000077463.10	chr19	2787	2130	2232	2214	1851
ENSG00000077498.8	chr11	3016	0	0	0	0
ENSG00000077514.4	chr11	5508	3976	3709	4582	3904
ENSG00000077522.8	chr1	5419	204	86	241	153
ENSG00000077549.13	chr1	3476	17210	19061	19032	21264
ENSG00000077585.9	chr1	2279	3624	4040	4278	4569
ENSG00000077616.6	chr11	7254	138	200	357	388
ENSG00000077684.11	chr4	9110	4650	3046	3633	1727
ENSG00000077713.13	chrX	3115	3649	3689	2783	2539
ENSG00000077721.11	chrX	3251	13653	13200	7063	9179
ENSG00000077782.15	chr8	12698	10989	10526	6768	6856
ENSG00000077800.7	chr7	2457	0	0	0	0
ENSG00000077809.8	chr7	10442	3907	4402	6123	7375
ENSG00000077935.12	chr22	4253	0	0	0	0
ENSG00000077942.13	chr22	7136	23250	25167	13997	16135
ENSG00000077943.7	chr10	7528	8	6	2	8
ENSG00000077984.4	chr20	930	1339	1354	156	132
ENSG00000078018.15	chr2	11559	149	226	1173	1327
ENSG00000078043.11	chr18	9236	3554	3354	3569	3555
ENSG00000078053.12	chr7	5636	1077	1058	780	868
ENSG00000078061.8	chrX	3497	8316	8307	7622	7904
ENSG00000078070.7	chr3	4321	4323	4290	4243	4116
ENSG00000078081.3	chr3	3816	282	213	100	162
ENSG00000078098.9	chr2	7003	543	565	897	1005
ENSG00000078114.14	chr10	13718	121	124	118	109
ENSG00000078124.7	chr11	8442	851	903	976	1035
ENSG00000078140.9	chr4	5245	18352	15127	13828	16214
ENSG00000078142.7	chr18	15176	2100	2015	2525	2568
ENSG00000078177.9	chr4	9835	3792	3142	3872	3300
ENSG00000078237.4	chr12	1602	9519	8178	12235	10120
ENSG00000078246.11	chr12	3181	6426	6374	7753	7657
ENSG00000078269.9	chr6	9985	7372	6504	7529	5759
ENSG00000078295.11	chr5	17784	223	312	234	194
ENSG00000078304.15	chr14	14289	11628	10240	11613	10719
ENSG00000078319.7	chr7	1114	1829	1904	2618	2645
ENSG00000078328.15	chr16	8213	174	79	229	222
ENSG00000078369.13	chr1	6351	42733	45726	48141	51905
ENSG00000078399.11	chr7	2550	2909	2698	3058	4198
ENSG00000078401.6	chr6	2033	306	231	1240	511
ENSG00000078403.12	chr10	6844	5101	3975	7260	4418
ENSG00000078487.13	chr7	3318	457	478	296	210
ENSG00000078549.10	chr7	6828	788	726	426	412
ENSG00000078579.8	chr8	1688	38	46	35	22
ENSG00000078589.8	chrX	1803	0	0	0	0
ENSG00000078596.6	chrX	2051	38	14	44	34
ENSG00000078618.15	chr1	6619	21474	23004	24902	29603
ENSG00000078668.9	chr8	3144	24631	22890	24521	21285
ENSG00000078674.13	chr8	12470	15477	14691	9352	10484
ENSG00000078687.12	chr17	11058	1140	734	1209	706
ENSG00000078699.16	chr20	9457	2243	1738	1880	1417
ENSG00000078725.8	chr9	3905	190	100	60	38
ENSG00000078747.8	chr20	6664	4952	4497	4999	4520
ENSG00000078795.12	chr5	4654	10	6	7	1
ENSG00000078804.8	chr20	4228	4346	4188	3354	4812
ENSG00000078808.12	chr1	4709	20070	21772	22904	22875
ENSG00000078814.11	chr20	7929	26	33	42	42
ENSG00000078898.6	chr20	1898	0	0	1	0
ENSG00000078900.10	chr1	6763	1040	926	806	674
ENSG00000078902.11	chr11	5983	3693	3548	3161	2164
ENSG00000078967.7	chr7	2144	1695	1911	1394	1281
ENSG00000079101.12	chr18	3846	24	6	24	28
ENSG00000079102.12	chr8	13527	60	35	90	34
ENSG00000079112.5	chr8	3901	12	0	2	0
ENSG00000079134.7	chr18	8099	4925	4410	5727	6515
ENSG00000079150.13	chr2	3080	1480	1448	1553	1675
ENSG00000079156.12	chr2	8028	1631	1625	1704	1558
ENSG00000079215.9	chr5	6265	3720	3181	1582	1546
ENSG00000079246.11	chr2	5463	40161	42757	40984	44571
ENSG00000079257.3	chr3	1504	0	0	0	0
ENSG00000079263.14	chr2	5829	4683	4547	4378	3620
ENSG00000079277.15	chr1	8060	198	135	437	416
ENSG00000079308.12	chr2	15595	1013	1165	2047	1669
ENSG00000079313.7	chr19	5186	3151	2809	2812	2505
ENSG00000079332.9	chr10	3999	18449	17784	26053	24129
ENSG00000079335.13	chr1	5729	1090	721	1203	736
ENSG00000079337.11	chr12	11995	114	166	252	253
ENSG00000079385.17	chr19	5524	4	6	90	76
ENSG00000079387.9	chr12	6366	4349	4000	5441	4316
ENSG00000079393.16	chr10	2349	0	0	6	0
ENSG00000079432.3	chr19	9494	4274	4256	4587	4605
ENSG00000079435.5	chr19	5206	404	385	473	343
ENSG00000079459.8	chr8	5202	38805	40813	17430	17212
ENSG00000079462.3	chr19	1419	5042	5757	6455	6527
ENSG00000079482.11	chrX	8224	928	805	1675	1315
ENSG00000079557.3	chr4	2217	0	0	0	0
ENSG00000079616.8	chr16	4312	9325	9186	11405	10440
ENSG00000079689.9	chr6	1447	12	12	8	6
ENSG00000079691.15	chr6	6881	1837	1673	2477	2282
ENSG00000079739.11	chr1	4090	8804	9924	10693	11690
ENSG00000079785.10	chr2	3817	45227	42015	45192	50981
ENSG00000079805.12	chr19	13443	7795	9222	11110	12106
ENSG00000079819.12	chr6	10247	15038	16923	17909	19904
ENSG00000079841.14	chr6	12800	50	33	191	184
ENSG00000079931.10	chr6	5293	2800	2481	3321	3307
ENSG00000079950.9	chr6	16387	4273	3827	4191	3705
ENSG00000079974.13	chr22	5870	201	204	138	152
ENSG00000079999.9	chr19	3761	7459	6676	9892	7136
ENSG00000080007.6	chr6	2807	3229	2533	3175	2920
ENSG00000080031.5	chr19	4344	232	204	858	657
ENSG00000080166.11	chr13	7047	0	2	10	4
ENSG00000080189.10	chr20	4106	18888	20161	16012	14026
ENSG00000080200.5	chr3	5003	2164	1416	2084	2018
ENSG00000080224.13	chr3	6303	218	199	249	160
ENSG00000080293.5	chr2	2900	0	0	0	0
ENSG00000080298.11	chr9	11037	545	509	1945	1889
ENSG00000080345.12	chr2	13473	8719	6728	12354	9389
ENSG00000080371.4	chr12	6670	3449	2552	3134	2817
ENSG00000080493.9	chr4	8361	479	488	388	276
ENSG00000080503.15	chr9	7132	2284	2195	4982	5012
ENSG00000080511.2	chr19	2001	0	0	0	6
ENSG00000080546.9	chr6	5121	2704	1571	2520	1442
ENSG00000080561.9	chrX	3097	482	484	374	324
ENSG00000080572.8	chrX	1931	0	0	0	10
ENSG00000080573.6	chr19	6750	76	102	100	104
ENSG00000080603.12	chr16	12746	6626	5340	7628	5668
ENSG00000080608.9	chr9	2707	4169	4201	10690	10947
ENSG00000080618.9	chr13	1767	8	6	0	0
ENSG00000080644.11	chr15	4765	500	498	336	331
ENSG00000080709.10	chr5	3995	180	140	195	148
ENSG00000080802.14	chr7	6999	1198	760	1268	804
ENSG00000080815.14	chr14	9947	14367	12983	14590	11928
ENSG00000080819.2	chr3	3666	9962	10430	11167	10607
ENSG00000080822.12	chr3	5217	9766	8298	15083	12730
ENSG00000080823.17	chr14	10996	4445	4072	4561	3981
ENSG00000080824.14	chr14	5248	333263	326189	329920	409756
ENSG00000080839.7	chr20	5954	3399	3134	4115	3059
ENSG00000080845.13	chr20	8789	4423	4257	3619	4095
ENSG00000080854.10	chr11	8781	327	393	513	480
ENSG00000080910.6	chr1	1227	0	0	0	0
ENSG00000080947.10	chr1	6813	73	139	159	109
ENSG00000080986.7	chr18	3247	22290	20618	34846	38212
ENSG00000081014.6	chr15	7359	1373	1135	1337	1295
ENSG00000081019.9	chr1	6819	1537	886	1942	948
ENSG00000081026.14	chr1	8180	2384	1770	2652	2221
ENSG00000081041.8	chr4	1500	0	0	0	0
ENSG00000081051.3	chr4	3259	102	86	340	356
ENSG00000081052.10	chr2	9895	135	162	72	92
ENSG00000081059.15	chr5	10063	0	0	0	0
ENSG00000081087.10	chr6	5325	2507	2163	2454	2805
ENSG00000081138.9	chr18	5593	2	8	14	6
ENSG00000081148.11	chr3	8337	26	18	34	18
ENSG00000081154.7	chr3	3102	16283	17118	18389	21846
ENSG00000081177.14	chr14	4601	4522	4198	4679	4255
ENSG00000081181.3	chr14	2418	1284	1190	3300	3473
ENSG00000081189.9	chr5	9053	953	778	1358	1269
ENSG00000081237.14	chr1	8507	70	56	145	188
ENSG00000081248.6	chr1	6166	0	0	0	8
ENSG00000081277.7	chr1	6211	0	4	2	0
ENSG00000081307.8	chr3	6827	10640	10587	7948	9060
ENSG00000081320.6	chr2	6580	2198	1102	1665	1070
ENSG00000081377.12	chr9	10457	4721	4282	3780	3824
ENSG00000081386.8	chr9	5921	1079	870	1325	809
ENSG00000081479.8	chr2	16260	38	8	26	22
ENSG00000081665.9	chr19	8414	0	0	0	0
ENSG00000081692.8	chr1	4315	3589	3085	3343	2272
ENSG00000081721.6	chr1	1762	5113	3839	6457	5035
ENSG00000081760.12	chr12	16089	6116	7273	5509	5527
ENSG00000081791.4	chr5	6047	5183	4964	4611	4391
ENSG00000081800.4	chr7	4415	0	0	0	0
ENSG00000081803.11	chr7	6364	848	843	1518	1701
ENSG00000081818.1	chr5	3621	0	0	0	0
ENSG00000081842.13	chr5	5374	0	1	0	1
ENSG00000081853.13	chr5	4653	0	0	0	10
ENSG00000081870.7	chr1	3236	5262	4407	5386	6230
ENSG00000081913.9	chr18	9153	890	640	651	460
ENSG00000081923.6	chr18	6652	2	0	6	0
ENSG00000081985.6	chr1	4233	2	0	2	0
ENSG00000082014.12	chr7	5198	1724	1640	1767	1679
ENSG00000082068.4	chr5	7039	13394	12499	9095	7909
ENSG00000082074.11	chr5	6100	126	121	63	116
ENSG00000082126.13	chr2	4978	822	849	2651	2669
ENSG00000082146.8	chr2	3242	4153	3977	3271	3374
ENSG00000082153.13	chr2	4593	16478	15563	20821	22623
ENSG00000082175.10	chr11	15305	0	0	0	6
ENSG00000082196.15	chr5	6347	496	245	220	176
ENSG00000082212.7	chr18	3427	10569	11732	10440	12510
ENSG00000082213.13	chr5	4172	9842	6370	4703	3547
ENSG00000082258.8	chr2	9081	4969	2472	5283	3556
ENSG00000082269.12	chr6	10589	2767	2855	3266	3072
ENSG00000082293.8	chr6	8333	248	332	253	323
ENSG00000082397.11	chr18	10975	15068	15177	19272	22658
ENSG00000082438.11	chr2	17176	2394	2195	3128	3639
ENSG00000082458.7	chrX	7841	669	548	1078	908
ENSG00000082482.9	chr1	3910	18	36	42	30
ENSG00000082497.7	chr1	5467	3451	2791	2739	2361
ENSG00000082512.10	chr1	9022	1918	2446	2424	3339
ENSG00000082515.12	chr5	5267	6656	5608	6968	6124
ENSG00000082516.8	chr5	5637	6486	5458	5753	5302
ENSG00000082556.6	chr8	5730	50	28	60	28
ENSG00000082641.11	chr17	5825	36591	39715	45601	41767
ENSG00000082684.10	chr3	6223	2	4	0	0
ENSG00000082701.10	chr3	8006	8428	6211	6716	5468
ENSG00000082781.6	chr3	9350	41639	42907	36766	32816
ENSG00000082805.15	chr12	13484	9045	8640	9776	8898
ENSG00000082898.12	chr2	11708	57909	55756	64931	62981
ENSG00000082929.4	chr4	1164	0	0	2	0
ENSG00000082996.14	chr3	3654	3740	3388	4630	4267
ENSG00000083067.17	chr9	13942	706	728	41	14
ENSG00000083093.5	chr16	4740	3696	2042	3189	1654
ENSG00000083097.10	chr6	10613	662	520	1007	725
ENSG00000083099.6	chr6	8679	3444	3066	4168	3992
ENSG00000083123.10	chr6	4102	1243	1149	915	900
ENSG00000083168.5	chr8	11852	3746	2498	4752	2666
ENSG00000083223.13	chr9	6707	3325	2569	4642	3857
ENSG00000083290.15	chr17	9843	132	148	136	106
ENSG00000083307.6	chr8	6060	0	0	0	0
ENSG00000083312.13	chr5	11977	24867	27275	31843	35457
ENSG00000083444.12	chr1	5320	20177	23356	14398	14247
ENSG00000083454.17	chr17	4190	328	467	336	386
ENSG00000083457.7	chr17	6657	3020	2930	4473	3666
ENSG00000083520.10	chr13	7602	8095	7680	6234	6218
ENSG00000083535.11	chr13	3669	1958	1610	1327	1521
ENSG00000083544.9	chr13	4112	879	736	524	567
ENSG00000083622.8	chr7	376	0	0	0	0
ENSG00000083635.7	chr13	3492	1747	1088	1517	1267
ENSG00000083642.14	chr13	13212	3439	2460	3148	2916
ENSG00000083720.8	chr5	4194	21387	23963	13101	12458
ENSG00000083750.8	chrX	2725	1492	883	1588	1165
ENSG00000083782.3	chr12	1805	0	0	6	6
ENSG00000083799.13	chr16	12963	13098	13385	10167	10528
ENSG00000083807.5	chr19	8025	2855	2594	2753	1744
ENSG00000083812.7	chr19	3795	616	257	743	216
ENSG00000083814.8	chr19	3532	398	180	436	158
ENSG00000083817.8	chr19	2561	480	492	614	663
ENSG00000083828.11	chr19	3261	1114	793	1193	609
ENSG00000083838.11	chr19	4923	705	522	827	653
ENSG00000083842.8	chr19	2211	11	21	27	14
ENSG00000083844.6	chr19	3042	753	638	698	450
ENSG00000083845.4	chr19	3617	215865	193617	212735	186627
ENSG00000083857.9	chr4	16168	3848	3446	8667	7973
ENSG00000083896.8	chr4	7032	5185	5309	6656	6829
ENSG00000083937.4	chr3	3106	6885	5716	4534	5345
ENSG00000084070.7	chr1	3436	4679	4160	4697	4396
ENSG00000084072.12	chr1	8071	7566	6381	7744	6853
ENSG00000084073.4	chr1	3572	17420	16022	12511	11601
ENSG00000084090.9	chr2	4414	22004	18830	19920	15869
ENSG00000084092.6	chr4	3415	7068	6656	6090	5756
ENSG00000084093.11	chr4	7875	3180	1703	1814	1134
ENSG00000084110.6	chr12	5146	13	6	18	5
ENSG00000084112.10	chr12	10039	3461	3146	4852	3567
ENSG00000084207.11	chr11	1925	52549	61326	72836	79163
ENSG00000084234.12	chr11	7444	19082	20558	43039	44972
ENSG00000084444.9	chr12	6807	2461	2397	2080	2197
ENSG00000084453.12	chr12	11637	153	124	174	117
ENSG00000084463.2	chr12	3418	24509	26442	28652	33707
ENSG00000084623.7	chr1	1725	88690	93685	86248	78532
ENSG00000084628.5	chr1	2987	24	18	30	20
ENSG00000084636.12	chr1	9365	2164	1906	1188	1157
ENSG00000084652.11	chr1	5103	9048	7843	8713	6652
ENSG00000084674.9	chr2	14828	0	0	16	0
ENSG00000084676.11	chr2	8633	3896	4119	4410	4315
ENSG00000084693.11	chr2	5283	13269	16094	16976	16791
ENSG00000084710.9	chr2	6828	3957	5138	2573	2980
ENSG00000084731.9	chr2	6397	7001	6839	5504	4720
ENSG00000084733.6	chr2	3631	17664	16881	22504	17877
ENSG00000084734.4	chr2	3149	0	0	2	0
ENSG00000084754.6	chr2	3971	24058	27177	24801	34915
ENSG00000084764.6	chr2	3459	3739	3325	4920	4756
ENSG00000084774.9	chr2	8422	21653	23390	24379	25335
ENSG00000085063.10	chr11	4942	60041	57462	46808	46186
ENSG00000085117.7	chr11	4054	1901	2238	1805	1596
ENSG00000085185.10	chrX	7996	1293	1010	1058	828
ENSG00000085224.16	chrX	12224	1458	2034	2398	2991
ENSG00000085231.9	chr5	4050	5407	4718	6724	5560
ENSG00000085265.6	chr9	1286	0	0	0	0
ENSG00000085274.11	chr3	5730	994	614	1329	692
ENSG00000085276.13	chr3	9103	854	598	1301	688
ENSG00000085365.13	chr5	6842	2526	2618	2574	2475
ENSG00000085377.9	chr6	3762	6418	6241	7415	7414
ENSG00000085382.7	chr6	9238	1452	1174	1409	1444
ENSG00000085415.11	chr18	10481	21772	21387	30958	26964
ENSG00000085433.11	chr1	4536	2506	2150	3392	2596
ENSG00000085449.10	chr2	5516	4457	4827	4965	4945
ENSG00000085465.11	chr1	2988	387	218	730	707
ENSG00000085491.11	chr1	6548	3627	3984	6922	7255
ENSG00000085511.15	chr6	7522	7020	5509	9373	8031
ENSG00000085514.10	chr7	2004	145	116	188	236
ENSG00000085552.12	chr1	6620	2249	2281	2479	2630
ENSG00000085563.10	chr7	5552	878	888	1144	1396
ENSG00000085644.9	chr16	6443	1038	984	674	964
ENSG00000085662.9	chr7	3660	22613	22759	24184	24525
ENSG00000085719.7	chr8	6792	12924	16252	14472	15359
ENSG00000085721.8	chr16	4156	7268	6161	8218	6559
ENSG00000085733.11	chr11	6949	22431	21949	22858	25564
ENSG00000085741.8	chr11	2401	6	16	17	10
ENSG00000085760.10	chr2	3371	8702	8617	7803	7767
ENSG00000085788.9	chr8	10686	3906	4007	4546	4870
ENSG00000085831.11	chr1	9362	821	937	1103	958
ENSG00000085832.12	chr1	7551	5182	4031	3892	3917
ENSG00000085840.7	chr1	3157	6363	6307	11859	10539
ENSG00000085871.4	chr4	3182	2522	2502	3735	3531
ENSG00000085872.10	chr19	6113	4642	4107	4944	5070
ENSG00000085978.17	chr2	6047	5638	4912	6478	5159
ENSG00000085982.9	chr2	9352	4781	4377	4852	5127
ENSG00000085998.9	chr1	6366	16653	16272	17398	16135
ENSG00000085999.7	chr1	3212	3797	3759	5993	6319
ENSG00000086015.15	chr1	7877	7755	8963	6911	6209
ENSG00000086061.11	chr9	2730	94880	79661	101005	95652
ENSG00000086062.8	chr9	5065	18642	14809	11978	10181
ENSG00000086065.9	chr9	2237	17004	15177	20327	20563
ENSG00000086102.14	chr9	7147	9247	7719	11205	8130
ENSG00000086159.8	chr12	5129	10	4	0	2
ENSG00000086189.5	chr5	3736	15527	14079	19099	17856
ENSG00000086200.12	chr5	7540	7022	7247	7454	7313
ENSG00000086205.12	chr11	3824	242	140	264	332
ENSG00000086232.8	chr7	5544	52516	53759	44574	49991
ENSG00000086288.7	chr7	2439	6	12	0	0
ENSG00000086289.7	chr7	2864	4057	4432	4939	4395
ENSG00000086300.11	chr7	3421	1946	2630	3973	4479
ENSG00000086475.10	chr10	3979	16524	15959	17839	15993
ENSG00000086504.11	chr16	2404	11770	11262	14742	12985
ENSG00000086506.2	chr16	536	0	0	0	0
ENSG00000086544.2	chr19	3385	2080	1705	2567	1601
ENSG00000086548.8	chr19	3052	0	0	0	0
ENSG00000086570.8	chr5	14537	10	12	12	10
ENSG00000086589.7	chr5	3631	13907	12189	13595	14690
ENSG00000086598.6	chr12	3822	25329	26483	24568	22486
ENSG00000086619.9	chr1	5688	959	716	603	552
ENSG00000086666.14	chr15	5065	9176	8062	16883	14338
ENSG00000086696.5	chr16	2012	26	16	101	92
ENSG00000086712.8	chrX	4460	2861	2428	3103	3156
ENSG00000086717.13	chrX	3519	14	2	2	0
ENSG00000086730.12	chr7	4542	2380	2570	3524	3382
ENSG00000086758.11	chrX	17373	8771	10600	11235	10564
ENSG00000086827.4	chr11	2992	10186	10459	7994	8776
ENSG00000086848.10	chr11	8014	18	22	25	26
ENSG00000086967.9	chr19	3708	0	0	16	8
ENSG00000086991.8	chr11	6327	246	192	208	243
ENSG00000087008.11	chr4	3846	1302	1672	1619	1359
ENSG00000087053.14	chr11	6119	9506	7686	11677	13486
ENSG00000087074.7	chr19	3093	6176	4011	9088	5459
ENSG00000087076.4	chr19	1281	659	767	1061	855
ENSG00000087077.7	chr7	2802	15148	14225	25893	18707
ENSG00000087085.9	chr7	3730	1284	982	993	1211
ENSG00000087086.9	chr19	878	57836	64647	131970	168899
ENSG00000087087.14	chr7	4587	18312	20795	20371	20934
ENSG00000087088.15	chr19	2587	22051	21322	30809	27739
ENSG00000087095.8	chr17	5288	4461	3761	4388	3778
ENSG00000087111.16	chr17	5990	13701	15032	15903	13613
ENSG00000087116.9	chr5	7687	458	472	1752	1799
ENSG00000087128.5	chr4	2138	30	20	42	44
ENSG00000087152.11	chr17	5301	11746	11755	15524	13197
ENSG00000087157.14	chr17	4965	4040	2739	4566	3295
ENSG00000087191.8	chr17	4483	124218	121280	152219	150220
ENSG00000087206.12	chr5	4852	3170	2696	2319	1576
ENSG00000087237.6	chr16	2085	0	4	8	0
ENSG00000087245.8	chr16	4933	22990	27148	13754	17322
ENSG00000087250.4	chr16	1837	2	3	3	2
ENSG00000087253.7	chr16	7439	10	2	19	5
ENSG00000087258.9	chr16	9813	4801	4406	2670	2642
ENSG00000087263.12	chr16	5806	10795	10270	9877	9309
ENSG00000087266.11	chr4	13968	1780	1542	2284	2068
ENSG00000087269.11	chr4	3538	4594	4885	5808	5737
ENSG00000087274.12	chr4	13106	18893	19900	22256	22143
ENSG00000087299.7	chr14	3911	2079	2114	2448	2521
ENSG00000087301.4	chr14	4739	979	661	652	597
ENSG00000087302.4	chr14	2334	21699	19285	20226	25862
ENSG00000087303.12	chr14	6158	169	221	94	134
ENSG00000087338.4	chr2	4922	4361	3847	3776	3438
ENSG00000087365.10	chr11	9795	46739	52457	58689	68185
ENSG00000087448.5	chr12	7622	6374	5770	7754	6639
ENSG00000087460.18	chr20	13320	158807	159637	125111	162859
ENSG00000087470.13	chr12	7184	17958	17705	19193	20683
ENSG00000087494.11	chr12	3377	4180	3231	5906	4155
ENSG00000087495.12	chr20	6095	94	91	90	92
ENSG00000087502.13	chr12	5826	8979	8607	10461	11901
ENSG00000087510.5	chr20	3112	32	2	0	0
ENSG00000087586.13	chr20	2928	31070	24559	21032	15821
ENSG00000087589.12	chr20	4025	88	60	74	36
ENSG00000087842.6	chrX	2512	1221	1001	2578	2655
ENSG00000087884.10	chr11	1943	461	388	357	318
ENSG00000087903.8	chr19	9094	1361	1195	1101	1052
ENSG00000087916.7	chrX	4521	0	0	0	0
ENSG00000087995.11	chr17	3114	4546	3621	5382	4945
ENSG00000088002.7	chr19	2822	18	26	35	20
ENSG00000088035.11	chr1	4950	3199	2862	2719	2101
ENSG00000088038.13	chr19	6697	2628	3044	3326	3722
ENSG00000088053.7	chr19	2703	29	26	20	12
ENSG00000088179.4	chr2	12542	1767	1302	1841	1385
ENSG00000088205.8	chr2	7851	25492	25117	32896	31594
ENSG00000088247.11	chr19	4563	18769	21642	18994	19354
ENSG00000088256.4	chr19	6242	2932	3768	3432	3121
ENSG00000088280.13	chr1	4891	1750	2079	2368	2134
ENSG00000088298.7	chr20	3387	6132	6765	5526	4695
ENSG00000088305.14	chr20	4630	2479	1824	2731	2116
ENSG00000088320.3	chr20	1665	0	0	0	0
ENSG00000088325.11	chr20	3605	31949	32838	34517	39496
ENSG00000088340.11	chr20	9212	432	361	168	233
ENSG00000088356.4	chr20	1385	8782	6941	9837	7879
ENSG00000088367.16	chr20	7859	8680	10381	6762	6841
ENSG00000088386.11	chr13	4192	0	2	0	0
ENSG00000088387.13	chr13	10061	1958	2152	1546	1325
ENSG00000088448.10	chr13	4557	9155	6313	2612	2935
ENSG00000088451.6	chr13	2586	1961	1333	1251	1246
ENSG00000088538.12	chr3	8755	714	835	1058	940
ENSG00000088543.10	chr3	3242	3857	4581	2789	2369
ENSG00000088682.9	chr16	4324	13304	13281	8171	7227
ENSG00000088726.11	chr3	3562	106	132	104	135
ENSG00000088727.8	chr3	5867	2347	2483	2090	2162
ENSG00000088756.8	chr18	11910	498	354	842	611
ENSG00000088766.6	chr20	4805	12241	11893	13511	11686
ENSG00000088782.4	chr20	514	0	0	0	0
ENSG00000088808.12	chr14	9031	1687	1609	1667	1321
ENSG00000088812.13	chr20	8753	3627	3730	4792	4411
ENSG00000088826.13	chr20	4943	4376	4680	4476	3693
ENSG00000088827.8	chr20	7886	0	2	15	8
ENSG00000088832.10	chr20	2369	48669	51977	48259	56246
ENSG00000088833.12	chr20	6125	6571	7554	10044	10102
ENSG00000088836.7	chr20	3966	1288	1377	1513	1403
ENSG00000088854.11	chr20	8864	1158	974	1547	1435
ENSG00000088876.7	chr20	4520	711	322	696	448
ENSG00000088881.15	chr20	3616	226	143	333	396
ENSG00000088882.7	chr20	2391	5	2	12	0
ENSG00000088888.13	chr20	4240	1259	1537	1621	1358
ENSG00000088899.10	chr20	5349	3754	4156	3139	3104
ENSG00000088926.9	chr4	4243	0	0	0	0
ENSG00000088930.6	chr20	3489	14049	14554	9671	10802
ENSG00000088970.11	chr20	4802	1705	1683	1308	1743
ENSG00000088986.6	chr12	2957	44960	46577	62327	72172
ENSG00000088992.13	chr12	1926	122	84	494	396
ENSG00000089006.12	chr20	7894	25729	23056	22207	21407
ENSG00000089009.11	chr12	4447	73023	69828	80937	90924
ENSG00000089012.10	chr20	2242	1	1	0	0
ENSG00000089022.9	chr12	5576	3818	3368	5469	4640
ENSG00000089041.12	chr12	3587	4	4	24	4
ENSG00000089048.10	chr20	3216	4034	3221	7363	6282
ENSG00000089050.10	chr20	3861	2938	2883	1926	2540
ENSG00000089053.8	chr12	12304	16325	15269	15722	16852
ENSG00000089057.10	chr20	7523	3925	4220	4212	4174
ENSG00000089060.7	chr12	6768	4619	4697	5343	4694
ENSG00000089063.10	chr20	2038	7005	6995	6103	6444
ENSG00000089091.11	chr20	6446	464	416	473	528
ENSG00000089094.12	chr12	13623	1202	1230	1399	1154
ENSG00000089101.13	chr20	7319	43	25	21	30
ENSG00000089116.3	chr12	3125	407	414	216	173
ENSG00000089123.11	chr20	3365	910	723	995	798
ENSG00000089127.8	chr12	3910	392	344	1091	1120
ENSG00000089154.6	chr12	9654	26160	27979	25638	18907
ENSG00000089157.11	chr12	4001	215781	217499	289091	257157
ENSG00000089159.11	chr12	7452	39151	38922	27741	31778
ENSG00000089163.4	chr12	1222	287	240	206	144
ENSG00000089169.10	chr12	10381	17	0	14	11
ENSG00000089177.13	chr20	6278	1885	1247	1147	821
ENSG00000089195.10	chr20	3754	4871	4511	5613	5424
ENSG00000089199.5	chr20	4535	138	238	140	150
ENSG00000089220.4	chr12	1780	32027	34356	29501	26511
ENSG00000089225.15	chr12	4363	18	6	42	46
ENSG00000089234.11	chr12	4686	2734	2311	2837	2164
ENSG00000089248.6	chr12	3083	24839	23345	21089	17504
ENSG00000089250.14	chr12	13144	1542	1550	1192	1169
ENSG00000089280.14	chr16	7218	41518	42028	49546	49777
ENSG00000089289.11	chrX	1862	9178	8740	10839	9650
ENSG00000089327.10	chr19	2993	19329	21116	9636	14541
ENSG00000089335.16	chr19	5032	1690	1646	1985	2322
ENSG00000089351.10	chr19	5942	6877	6864	5796	5770
ENSG00000089356.12	chr19	3385	0	0	0	0
ENSG00000089472.12	chrX	7113	22	34	519	440
ENSG00000089486.12	chr16	4268	5338	4864	3696	3927
ENSG00000089505.13	chr16	1467	267	291	549	289
ENSG00000089558.4	chr17	3924	38	12	24	16
ENSG00000089597.12	chr11	4933	65278	78100	61387	70571
ENSG00000089639.6	chr19	3740	607	686	667	615
ENSG00000089682.12	chrX	6105	1360	1497	1047	1165
ENSG00000089685.10	chr17	3815	52019	51648	44647	38744
ENSG00000089692.4	chr12	3056	463	409	213	331
ENSG00000089693.6	chr12	3773	66748	66489	73023	65374
ENSG00000089723.5	chr14	4252	1615	1434	1694	1338
ENSG00000089737.11	chr14	6007	13289	14727	12668	13238
ENSG00000089775.6	chr14	3443	1138	918	1256	1083
ENSG00000089818.12	chr12	4155	15667	14597	19425	16909
ENSG00000089820.11	chrX	5580	6	14	24	32
ENSG00000089847.8	chr19	4474	110	63	148	88
ENSG00000089876.7	chr10	3948	6223	4363	6555	4548
ENSG00000089902.8	chr14	6202	3830	3190	5186	3967
ENSG00000089916.13	chr14	21987	3475	3126	3146	2448
ENSG00000090006.13	chr19	8109	14304	14840	21087	24334
ENSG00000090013.5	chr19	1665	12859	13277	15247	13069
ENSG00000090020.6	chr1	5974	2613	2755	3561	3585
ENSG00000090054.9	chr9	3658	10833	11504	13076	13518
ENSG00000090060.13	chr14	12766	19412	16893	15506	17437
ENSG00000090061.13	chr14	8220	3389	3357	3398	4113
ENSG00000090097.15	chr3	3738	10755	11261	13063	11820
ENSG00000090104.7	chr1	4117	0	2	0	0
ENSG00000090238.7	chr16	3181	778	724	984	1028
ENSG00000090263.11	chr7	1818	6314	5511	6236	5360
ENSG00000090266.8	chr7	4447	12358	11041	13436	9881
ENSG00000090273.9	chr1	2856	25880	27457	27421	32960
ENSG00000090316.11	chr4	9857	27169	25695	20856	22205
ENSG00000090339.4	chr19	3706	16	26	12	16
ENSG00000090372.10	chr19	7641	10181	10670	13307	11429
ENSG00000090376.4	chr12	10004	0	2	14	4
ENSG00000090382.2	chr12	1764	2	0	2	0
ENSG00000090402.3	chr3	6138	0	0	0	0
ENSG00000090432.5	chr1	2436	5165	4058	4529	2710
ENSG00000090447.7	chr16	7867	1826	1420	2713	1731
ENSG00000090470.10	chr15	3263	4709	3664	5632	4268
ENSG00000090487.6	chr15	3984	14590	13948	12011	12593
ENSG00000090512.7	chr3	2024	42	38	96	124
ENSG00000090520.6	chr3	6040	16672	15638	14631	13318
ENSG00000090530.5	chr3	5605	2792	3024	4285	4568
ENSG00000090534.13	chr3	1915	65	35	46	79
ENSG00000090539.11	chr3	6620	508	487	624	651
ENSG00000090554.7	chr19	3523	181	134	348	357
ENSG00000090565.11	chr16	6317	3530	3417	3831	3171
ENSG00000090581.5	chr16	3672	5937	6388	6307	6846
ENSG00000090612.16	chr12	6905	697	521	646	550
ENSG00000090615.8	chr12	10550	5067	4074	4894	4016
ENSG00000090621.9	chr1	6782	26064	23664	26578	30544
ENSG00000090659.13	chr19	4428	6	0	16	6
ENSG00000090661.7	chr19	4059	1463	1200	1631	1272
ENSG00000090674.11	chr19	3956	3234	3921	3136	2985
ENSG00000090686.11	chr1	9497	4780	3941	4604	5426
ENSG00000090776.5	chrX	3314	1336	1244	1420	1548
ENSG00000090857.9	chr16	9148	18258	19426	10126	9508
ENSG00000090861.11	chr16	4498	7908	8147	8418	7428
ENSG00000090863.7	chr16	9550	23765	25730	13110	14901
ENSG00000090889.10	chrX	4723	16331	17388	20454	20324
ENSG00000090905.13	chr16	12522	6824	4203	8226	6335
ENSG00000090920.9	chr19	16564	6	4	24	22
ENSG00000090924.10	chr19	9199	1761	1636	2238	2219
ENSG00000090932.6	chr19	2618	1044	993	1152	816
ENSG00000090971.4	chr19	2163	3644	3168	4251	3342
ENSG00000090975.8	chr12	9165	1693	1639	2679	2354
ENSG00000090989.13	chr4	5347	7932	7602	6628	7307
ENSG00000091009.6	chr5	6900	4225	3882	4703	3764
ENSG00000091010.4	chr5	1182	2	2	10	11
ENSG00000091039.12	chr12	9198	7123	6546	5623	6050
ENSG00000091073.15	chr7	5042	1783	1144	1672	1297
ENSG00000091106.14	chr2	3624	40	18	12	6
ENSG00000091127.9	chr7	4421	5156	4586	5687	6016
ENSG00000091128.8	chr7	7016	38	18	28	20
ENSG00000091129.15	chr7	7939	170	192	296	210
ENSG00000091136.9	chr7	8140	14397	15865	28770	28696
ENSG00000091137.7	chr7	5800	24	16	26	28
ENSG00000091138.8	chr7	3382	0	0	0	0
ENSG00000091140.8	chr7	5299	19325	18789	15341	16124
ENSG00000091157.9	chr18	10685	2054	1460	1436	1447
ENSG00000091164.8	chr18	11298	12015	10707	14902	15136
ENSG00000091181.15	chr3	3377	6	2	4	14
ENSG00000091262.10	chr16	7559	208	180	167	161
ENSG00000091317.7	chr3	4413	8453	9198	7597	7290
ENSG00000091409.10	chr2	6704	16360	16705	15248	16970
ENSG00000091428.13	chr2	7161	243	188	155	176
ENSG00000091436.12	chr2	13799	7842	8053	10699	10388
ENSG00000091482.5	chrX	1040	141	51	36	88
ENSG00000091483.6	chr1	2142	15911	16583	15522	18824
ENSG00000091490.6	chr4	7483	5965	6083	8636	8815
ENSG00000091513.10	chr3	8565	8	10	0	0
ENSG00000091527.11	chr3	4367	41988	31895	29689	26552
ENSG00000091536.12	chr17	19117	8	16	36	22
ENSG00000091542.8	chr17	3190	4144	3645	3823	3086
ENSG00000091583.6	chr17	1332	0	0	0	0
ENSG00000091592.11	chr17	12811	3462	3625	5611	6112
ENSG00000091622.11	chr17	10609	1510	1263	918	808
ENSG00000091640.3	chr17	2831	7793	6350	7482	5539
ENSG00000091651.4	chr16	4309	5010	3882	4680	3636
ENSG00000091656.11	chr8	15696	1496	792	1759	1387
ENSG00000091664.7	chr11	4219	0	0	0	0
ENSG00000091704.5	chr7	2921	0	0	4	6
ENSG00000091732.11	chr7	3011	3342	3091	3332	3026
ENSG00000091831.16	chr6	13630	26	16	32	10
ENSG00000091844.3	chr6	7899	699	385	911	601
ENSG00000091879.9	chr8	6784	0	0	44	32
ENSG00000091947.5	chr17	3029	7292	7570	6285	4643
ENSG00000091972.14	chr3	2991	132	136	270	236
ENSG00000091986.11	chr3	5305	4088	4849	6080	6478
ENSG00000092009.6	chr14	937	0	0	0	0
ENSG00000092010.10	chr14	1781	10714	9956	18166	19634
ENSG00000092020.6	chr14	3863	1952	1651	1717	1607
ENSG00000092036.12	chr14	2539	5192	5099	6245	6247
ENSG00000092051.12	chr14	5307	2362	2281	1836	1700
ENSG00000092054.12	chr14	6087	0	0	0	0
ENSG00000092067.5	chr14	1554	0	2	0	0
ENSG00000092068.14	chr14	5942	164	144	152	193
ENSG00000092094.6	chr14	5041	11643	10806	10755	8713
ENSG00000092096.10	chr14	4278	2157	2668	2209	2894
ENSG00000092098.12	chr14	4982	2035	2222	3139	2972
ENSG00000092108.16	chr14	6571	7447	6869	5778	6627
ENSG00000092140.10	chr14	10025	2431	1639	1498	1447
ENSG00000092148.8	chr14	12417	11738	11005	11380	10509
ENSG00000092199.13	chr14	7315	127787	142403	151720	140036
ENSG00000092200.8	chr14	5494	53	38	50	71
ENSG00000092201.5	chr14	7151	31837	33742	42512	44958
ENSG00000092203.9	chr14	7076	7346	6990	9244	7926
ENSG00000092208.12	chr14	2532	2896	1906	1694	1307
ENSG00000092295.7	chr14	3735	1185	964	749	543
ENSG00000092330.11	chr14	2712	6821	6554	11491	9670
ENSG00000092345.9	chr3	3631	0	0	0	0
ENSG00000092377.9	chrY	2407	0	0	4	0
ENSG00000092421.12	chr5	10956	269	209	117	124
ENSG00000092439.9	chr15	9198	3218	3177	4870	4024
ENSG00000092445.7	chr15	6697	8991	10119	9719	10166
ENSG00000092470.7	chr15	4078	4971	4588	8169	8061
ENSG00000092529.18	chr15	5129	15	13	12	16
ENSG00000092531.5	chr15	5893	8459	9323	9702	10430
ENSG00000092607.9	chr1	3806	537	374	576	403
ENSG00000092621.7	chr1	5622	16508	18274	27115	27665
ENSG00000092758.11	chr20	4831	2	2	8	8
[truncated: 55,447 more rows]

## Sheet: confidence intervals
	99% Confidence intervals
Sample comparison	lower limit	upper limit	number of simulations in which the simulated value was greater than or equal to the actual (IP) value
- vs + CtIP, no DNA damage	0.000000	0.005284	(0/1000)
- vs + CtIP, with CPT treatment	0.000000	0.005284	(0/1000)
- vs + CPT treatment, wild-type	0.000000	0.005284	(0/1000)
