# Supplementary material for: Sae2/CtIP prevents R-loop accumulation in eukaryotic cells
Source: eLife. 2018 Dec 7;7:e42733. doi: 10.7554/eLife.42733 (PMC6296784; doi:10.7554/eLife.42733)
Supplement: Supplementary file 4. [file elife-42733-supp4.xlsx]

## Sheet: Sheet1
Oligonucleotides used in this study
Gene	organism	oligo name	sequence	used in Figure:	assay:
CEN16 forward	yeast	TP5271	TGAGCAAACAATTTGAACAG	2E	ChIP-qPCR
CEN16 reverse	yeast	TP5272	CCGATTTCGCTTTAGAAC	2E	ChIP-qPCR
35S promoter forward	yeast	TP5247	CCCTCCCATTACAAACTAAA	2E	ChIP-qPCR
35S promoter reverse	yeast	TP5248	GCGAGAAATACGTAGTTAAG	2E	ChIP-qPCR
35S 5ʹ ETS2 forward	yeast	TP5251	AACAGCTGAAATTCCAGAAA	2E	ChIP-qPCR
35S 5ʹ ETS2 reverse	yeast	TP5252	CTATGGTATGGTGACGGAGT	2E	ChIP-qPCR
18S 5ʹ region forward	yeast	TP5253	TCCAATTGTTCCTCGTTAAG	2E	ChIP-qPCR
18S 5ʹ region reverse	yeast	TP5254	ATTCAGGGAGGTAGTGACAA	2E	ChIP-qPCR
25S forward	yeast	TP5255	TTACACCCAAACACTCGCAT	2E	ChIP-qPCR
25S reverse	yeast	TP5256	GACTGAGGACTGCGACGTAA	2E	ChIP-qPCR
5S forward	yeast	TP5257	ACCTGCGTTTCCGTTAACT	2E	ChIP-qPCR
5S reverse	yeast	TP5258	AGTTGATCGGACGGGAAAC	2E	ChIP-qPCR
Ty1 forward	yeast	TP5263	TCGATGAAGACTTAAACCGT	2E	ChIP-qPCR
Ty1 reverse	yeast	TP5264	TGGATTCTTGGATCTCATTT	2E	ChIP-qPCR
ADH1-1 forward	yeast	TP5407	TCCAAAGCCAAAGGCCAAC	3A	ChIP-qPCR
ADH1-1 reverse	yeast	TP5408	CAAGCGTGCAAGTCAGTGTG	3A	ChIP-qPCR
ADH1-2 forward	yeast	TP5409	TAAGGGCTGGAAGATCGGTG	3A	ChIP-qPCR
ADH1-2 reverse	yeast	TP5410	AGGACAGTTGGATTCGTTACCC	3A	ChIP-qPCR
ADH1-3 forward	yeast	TP5411	CTTGTGTGCTGGTATCACCGTC	3A	ChIP-qPCR
ADH1-3 reverse	yeast	TP5412	GCAGCACCGGAGATAGCAAC	3A	ChIP-qPCR
ADH1-4 forward	yeast	TP5413	CATTGTCGGTGCTGTTCTAAAGG	3A	ChIP-qPCR
ADH1-4 reverse	yeast	TP5414	TCAATAGCGGCTTCGGAAACg	3A	ChIP-qPCR
ADH1-5 forward	yeast	TP5415	AACAGAGCTGACACCAGAGAAG	3A	ChIP-qPCR
ADH1-5 reverse	yeast	TP5416	CTGGCAAGGTAGACAAGCCG	3A	ChIP-qPCR
ENO2-1 forward	yeast	TP5417	ATCCGTCTACGACTCCCGTG	3A	ChIP-qPCR
ENO2-1 reverse	yeast	TP5418	GAGGCACCAGATGGAACAATG	3A	ChIP-qPCR
ENO2-2 forward	yeast	TP5419	GGCCAACCTAGATGTTAAGGACC	3A	ChIP-qPCR
ENO2-2 reverse	yeast	TP5420	CATGGAGACACCCAAGATAGCG	3A	ChIP-qPCR
ENO2-3 forward	yeast	TP5421	CCAACTGGTGCTAAGACCTTCG	3A	ChIP-qPCR
ENO2-3 reverse	yeast	TP5422	GACGTTACCGGCAGAAGCAC	3A	ChIP-qPCR
ENO2-4 forward	yeast	TP5423	CCAAGTGGTTGACTGGTGTCG	3A	ChIP-qPCR
ENO2-4 reverse	yeast	TP5424	CAAATGGATCTTCGATGGAGACA	3A	ChIP-qPCR
ENO2-5 forward	yeast	TP5425	TGACTGTCACCAACCCAGCTAG	3A	ChIP-qPCR
ENO2-5 reverse	yeast	TP5426	GAGTCTTGAGCAGCCTTGATGG	3A	ChIP-qPCR
FBA-1 forward	yeast	TP5429	CGGTGTCATCGTTGGTGAAG	3A	ChIP-qPCR
FBA-1 reverse	yeast	TP5430	ACGGCAGTAGAAGAAGAGGTGAC	3A	ChIP-qPCR
FBA-2 forward	yeast	TP5431	CTATTGCCGCTGCCCACTAC	3A	ChIP-qPCR
FBA-2 reverse	yeast	TP5432	GAACCATGGCAACAACTTCTTG	3A	ChIP-qPCR
FBA-3 forward	yeast	TP5433	TCAAGAGAATGGCCGCTATG	3A	ChIP-qPCR
FBA-3 reverse	yeast	TP5434	GGTGTACAAGTCTTCCTTGTCAGC	3A	ChIP-qPCR
FBA-4 forward	yeast	TP5435	CCAGAAATCTTGGCTGAACACC	3A	ChIP-qPCR
FBA-4 reverse	yeast	TP5436	CTTGGACAGTAGAACCGGAACC	3A	ChIP-qPCR
FBA-5 forward	yeast	TP5437	CCAGTCGGTAACCCAGAAGGTC	3A	ChIP-qPCR
FBA-5 reverse	yeast	TP5438	GGTGATCTTAGCACCCATGGTC	3A	ChIP-qPCR
PDC1 forward	yeast	TP5341	CAGCAACTGGCTTGTAACCC	3B	ChIP-qPCR
PDC1 reverse	yeast	TP5342	CCCCAATGGGTAAGGGTTCC	3B	ChIP-qPCR
NRD1 forward	yeast	TP4895	GGTCCAAGAGATTGTTGTGAC	3B	ChIP-qPCR
NRD1 reverse	yeast	TP4896	CCAACGATAATATCCGGTTCTTC	3B	ChIP-qPCR
SNR13-1 forward	yeast	TP4863	AATGGAGCCTGGTAAGTTCC	3B	ChIP-qPCR
SNR13-1 reverse	yeast	TP4864	ATATAGAGACGATTTGAGATGCC	3B	ChIP-qPCR
SNR13-2 forward	yeast	TP4865	CTGACCTTTTAACTTCCCCGTAG	3B	ChIP-qPCR
SNR13-2 reverse	yeast	TP4866	ATGAACAAGCCAAACCCAAC	3B	ChIP-qPCR
SNR13-3 forward	yeast	TP4867	CACGGAAGCGACAGAAAGACAGGGAG	3B	ChIP-qPCR
SNR13-3 reverse	yeast	TP4868	CTAGAGGGAATGTATGTTGTTGAAG	3B	ChIP-qPCR
SNR13-4 forward	yeast	TP4871	CGTTTCTTGTGAGTACTTCGTTTGCG	3B	ChIP-qPCR
SNR13-4 reverse	yeast	TP4872	TCAGCCAAATCTCAAACCTTCCC	3B	ChIP-qPCR
SNR5-1 forward	yeast	TP4875	TTTTCACAGCGCGCTCCTTG	3B	ChIP-qPCR
SNR5-1 reverse	yeast	TP4876	GGAGGCGTGATGTCTTAAGCATG	3B	ChIP-qPCR
SNR5-2 forward	yeast	TP4877	GGTTCGCTCTAGGTGTACATATCTTCAC	3B	ChIP-qPCR
SNR5-2 reverse	yeast	TP4878	AGCGCCTTAGCTGACTACAGCAC	3B	ChIP-qPCR
Sγ3-1 Forward	mouse	TP6284	AGCCCAGGAGAGGTAAGG	6A	qPCR
Sγ3-1 Reverse	mouse	TP6285	CACCCACACTTACTCTAGCTTC	6A	qPCR
Polymerase Nu-1Forward	human	TP6462	AGCTGTCTCCTCAGTCCTT	S3D	qPCR
Polymerase Nu-1Reverse	human	TP6463	TGAGCTGATGCTCTTCTGTTT	S3D	qPCR
MCMDC2-1 Forward	human	TP6466	GTTGCTCCGAATGCAGTATTTC	S3D	qPCR
MCMDC2-1Reverse	human	TP6467	GTTGGCACTGAGTCAGATAGAG	S3D	qPCR
MOV10L1-1 Forward	human	TP6478	CTGCCCTGACTTTGGCATA	S3D	qPCR
MOV10L1-1 Reverse	human	TP6479	GGGTCACTCGAGGGTTTATTT	S3D	qPCR
FcRn-1 Forward	human	TP6510	CTGGAATCTCCAGCCAAGTC	S3D	qPCR
FcRn-1 Reverse	human	TP6511	CTCATCCTTCTCCACAACAGAG	S3D	qPCR
ATG4A-1 Forward	human	TP6554	GCTCAAGCCCTTATCTGTAGAC	S3D	qPCR
ATG4A-1 Reverse	human	TP6555	ACTGTAGGATGCGTTGGTATTC	S3D	qPCR
Elf3-1 Forward	human	TP6578	TGGGCGCTTCTAACCTAATC	S3D	qPCR
Elf3-1 Reverse	human	TP6579	ATCAATGAACTGTCCTCCCTAAA	S3D	qPCR
RPL13A-1 Forward	human	TP5995	CGAGAAGAACGTGGAGAAGAAA	6E, F	qPCR
RPL13A-1 Reverse	human	TP5996	GGCAACGCATGAGGAATTAAC	6E, F	qPCR
RPL13A-2 Forward	human	TP5997	GAGATGACTCCACATGCACTAC	6E, F	qPCR
RPL13A-2 Reverse	human	TP5998	CATACCTGTTGGGTGACAGATAG	6E, F	qPCR
RPL13A-3 Forward	human	TP5999	CTTACGCTGCACCATCTACTT	6E, F	qPCR
RPL13A-3 Reverse	human	TP6000	CGCAGACCATCGTGAGATAAG	6E, F	qPCR
CD30-1 Forward	human	TP6562	ACCCAGGCATCTGCTTTAC	6D	qPCR
CD30-1 Reverse	human	TP6563	CCACTACTCCTTAGCGTGAAAT	6D	qPCR
UBF-1 Forward	human	TP6257	GTCGGCCATGTTCATCTTCT	6C	qPCR
UBF-1 Reverse	human	TP6258	CTCAGACAGGTCGTTCCACA	6C	qPCR
ß-actin 5' pause Forward	human	TP4729	TTACCCAGAGTGCAGGTGTG	6B	qPCR
ß-actin 5' pause Reverse	human	TP4730	CCCCAATAAGCAGGAACAGA	6B	qPCR
ß-actin pause Forward	human	TP4731	GGGACTATTTGGGGGTGTCT	6B	qPCR
ß-actin pause Reverse	human	TP4732	TCCCATAGGTGAAGGCAAAG	6B	qPCR
ATMIN-1 Forward	human	TP6490	GGCTAAGTTCCAGTCAAGTAGG	S3D	qPCR
ATMIN-1 Reverse	human	TP6491	AGGCATGTGCCACAGAAA	S3D	qPCR
RBFOX3-1 Forward	human	TP6498	CTCCACTGTCTCATGAAGTGTC	S3D	qPCR
RBFOX3-1 Reverse	human	TP6499	GGGCTATGTACAACGGGAATAG	S3D	qPCR
Globin B3-1 Forward	human	TP6506	GCCAGAACTTCGGCAGTAAA	S3D	qPCR
Globin B3-1 Reverse	human	TP6507	CCTGAGAGCTTGCTAGTGATTG	S3D	qPCR
To detect bottom strand nick in RPL13A gene, nested primer	human	TP5991	bio-taggacaaaagaagggaatgcttgcttgtgagg	8D	LM-PCR	from Hatchi, et. Al., Molecular Cell, 2015
To detect bottom strand nick in RPL13A gene, primer extension	human	TP5992	tcatttaaacaggaacttagctctggcaagtactgcgctg	8D	LM-PCR	from Hatchi, et. Al., Molecular Cell, 2015
To detect top strand nick in RPL13A gene, nested primer	human	TP5993	bio-CTCTGGGGTAAGGTTGTACATGTAAGTATACAGGTAACAAAC	8D	LM-PCR	from Hatchi, et. Al., Molecular Cell, 2015
To detect top strand nick in RPL13A gene, primer extension	human	TP5994	GAATCTAGCTTCCTTTACTTCACAGCATGTTTACTTTTAGTG	8D	LM-PCR
Long Adaptor oligonucleotides (LM1) for LM-PCR	human	TP5468	GCATGGATGTTTTCCCAGTCACGACGTTGTGGGGACAAGTTTGTACAAAAAAGCAGGCTTCCAAC	8D	LM-PCR
Short Adaptor oligonucleotides (LM2) for LM-PCR	human	TP5469	GTTGGAAGCCTGCTTTTTTGTACAAACTTGTCCCC	8D	LM-PCR
Linker primer for LM-PCR for LM-PCR	human	TP5470	GCATGGATGTTTTCCCAGTCACGACGTTGT	8D	LM-PCR
