# Supplementary figures and images for: Sae2/CtIP prevents R-loop accumulation in eukaryotic cells
Source: eLife journal article supplement (doi:10.7554/elife.42733), 2018-12-07

A

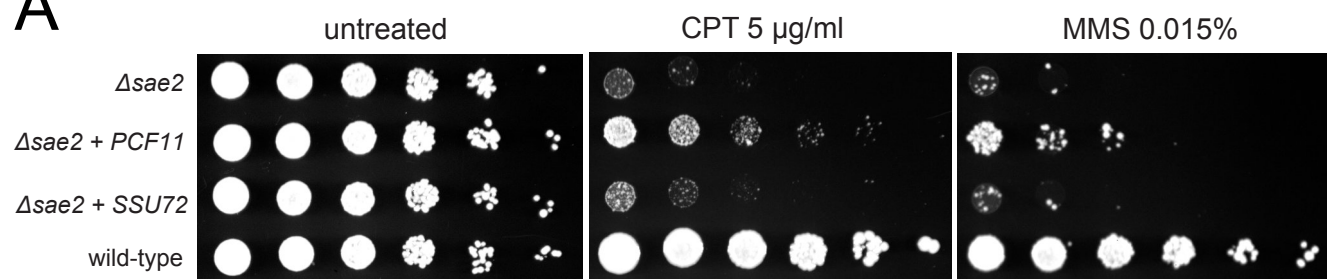

B

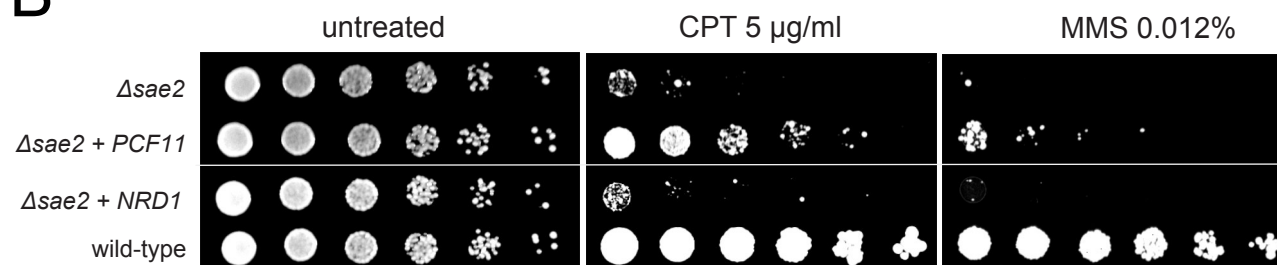

C

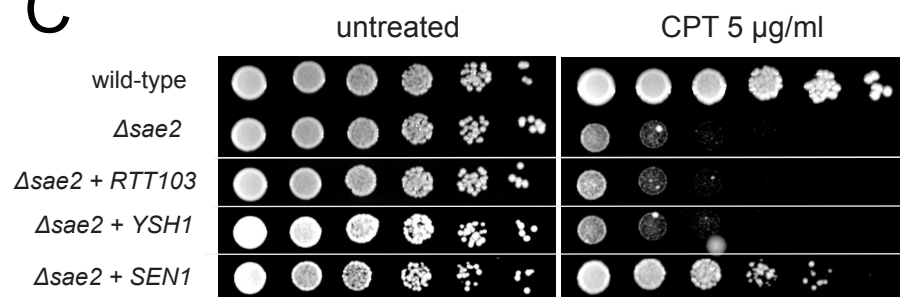

Supplement: supp [file elife-42733-supp-v1.zip]

A

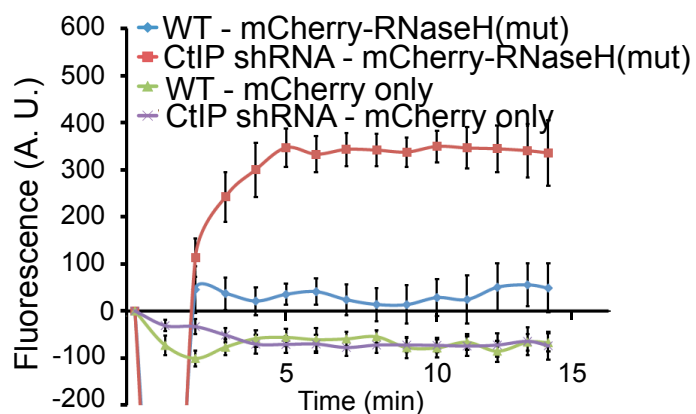

B

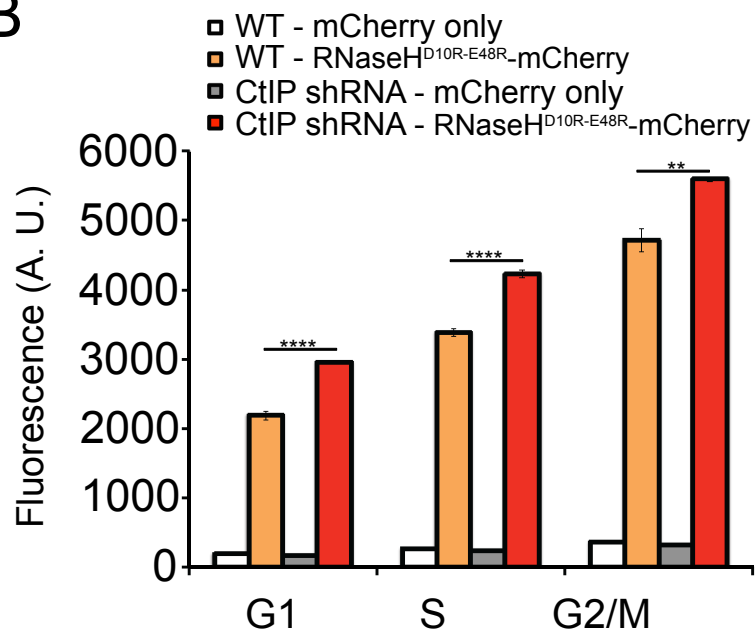

C

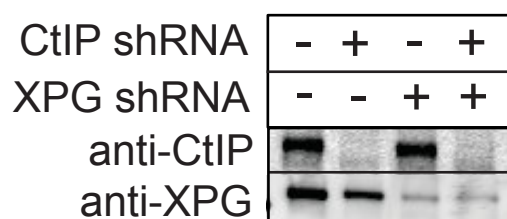

D

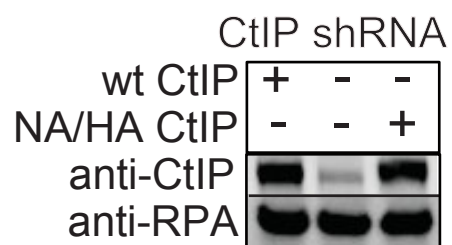

E

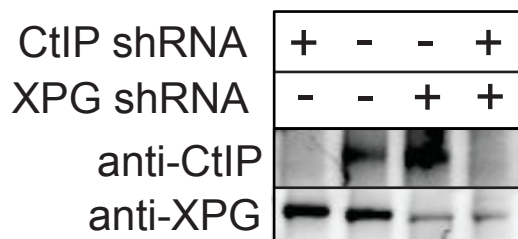

Supplement: supp [file elife-42733-supp-v1.zip]

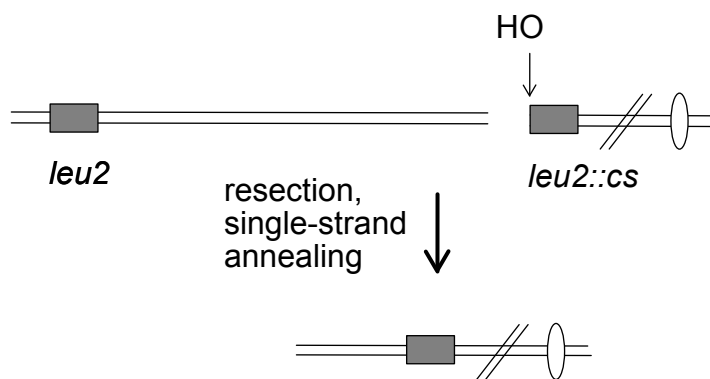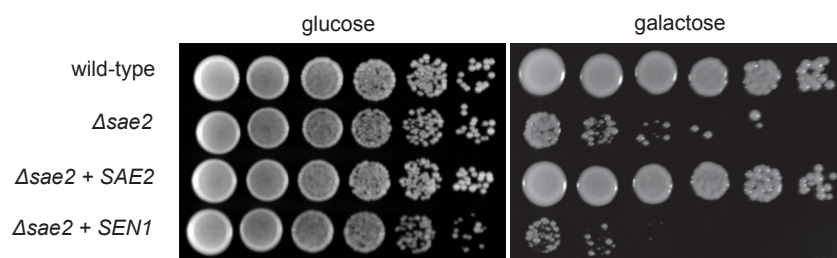

Supplement: supp [file elife-42733-supp-v1.zip]

A

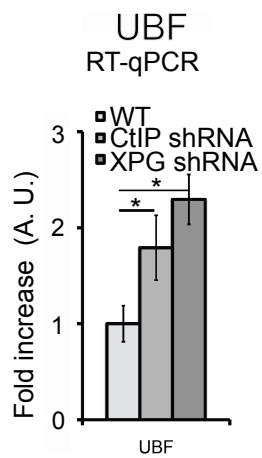

B

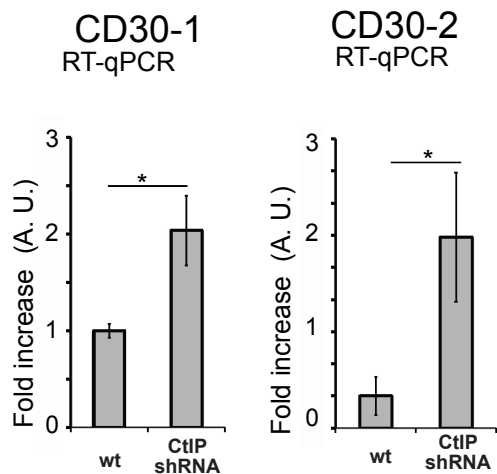

C

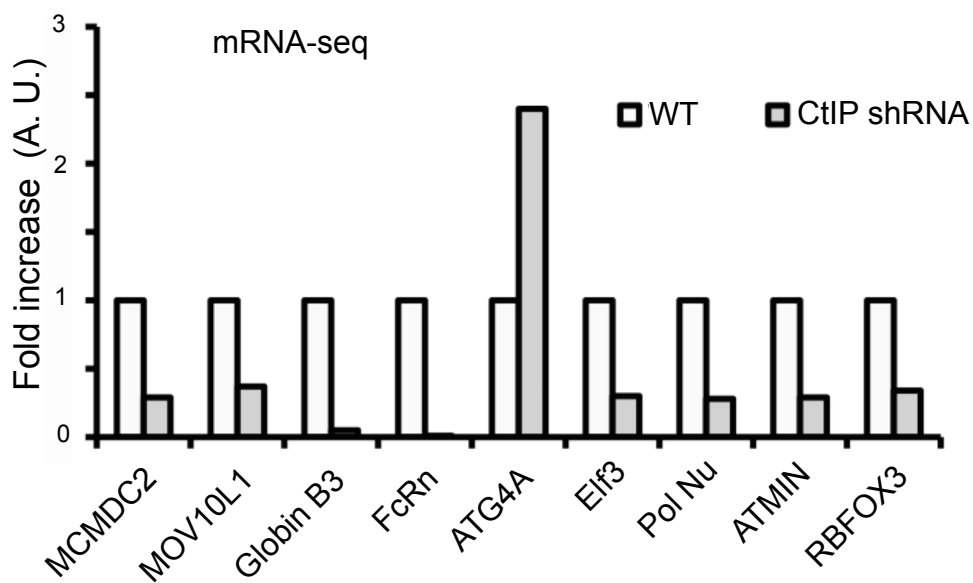

D

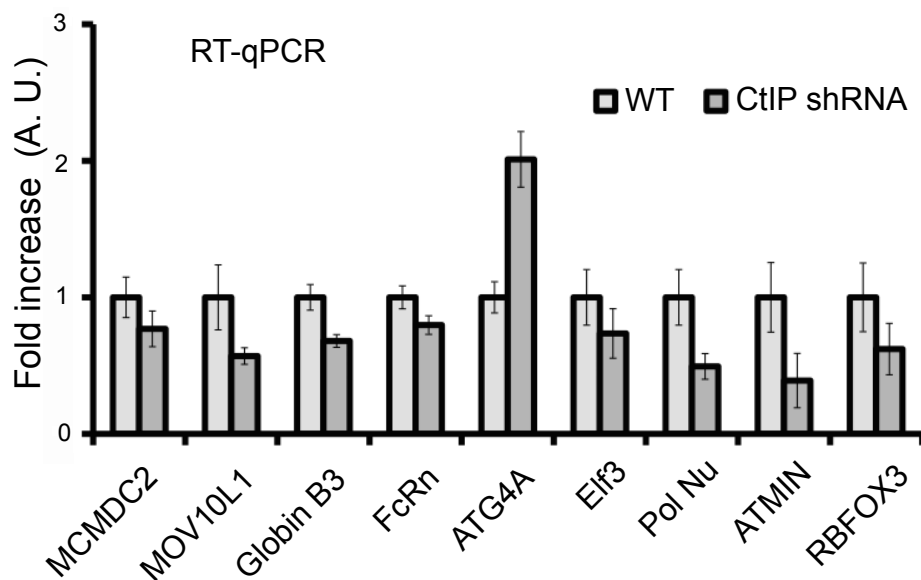

Supplement: supp [file elife-42733-supp-v1.zip]

Sy3  
RT-qPCR

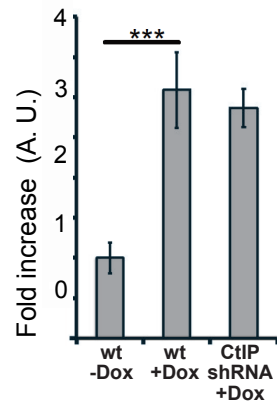

Supplement: supp [file elife-42733-supp-v1.zip]

A

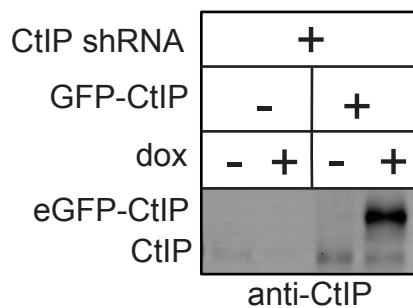

B

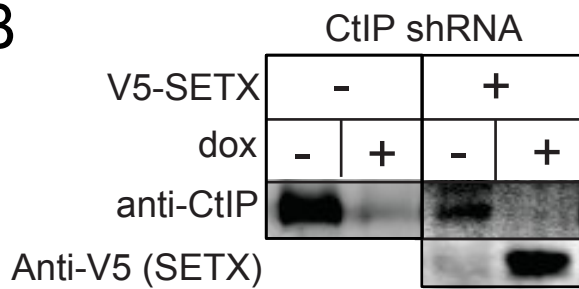

C

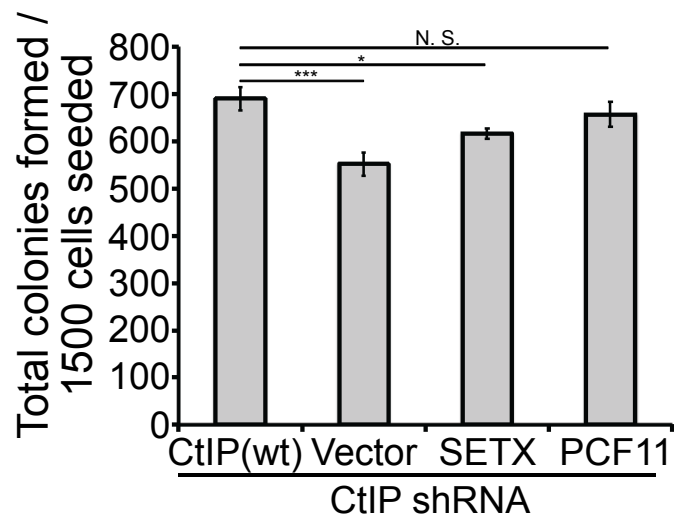

D

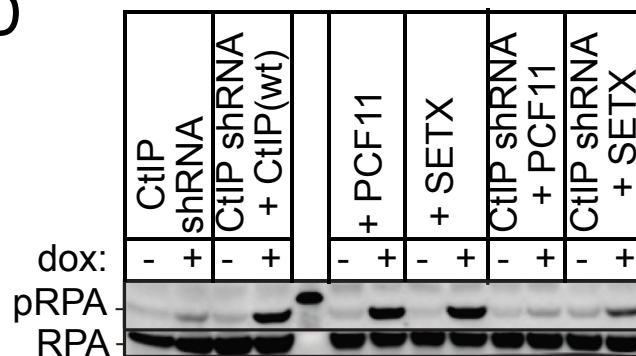

E

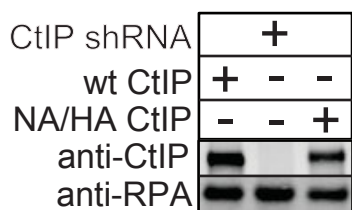

F

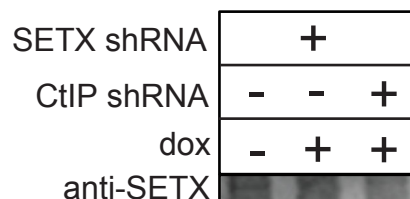

G

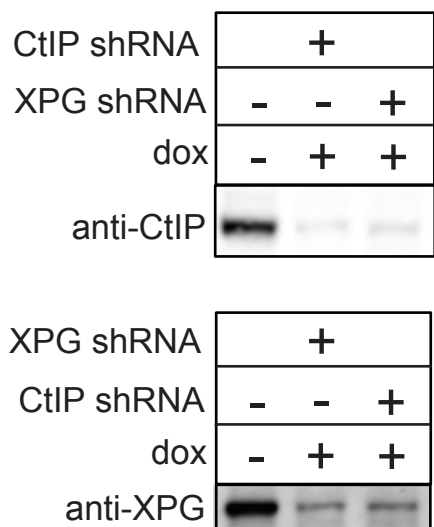

H

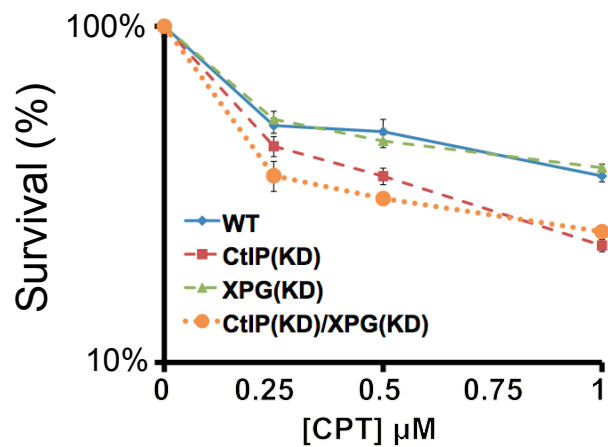

Supplement: supp [file elife-42733-supp-v1.zip]

**A**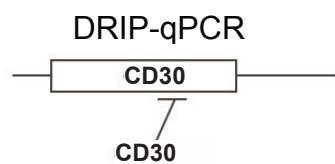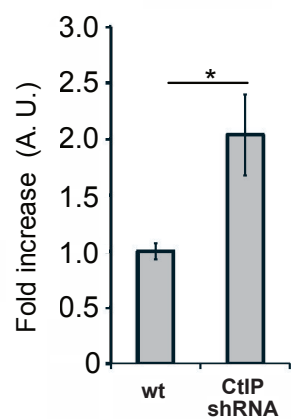**B**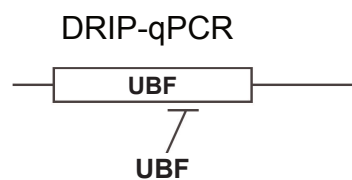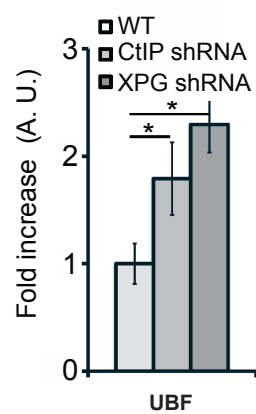

Supplement: supp [file elife-42733-supp-v1.zip]

**A**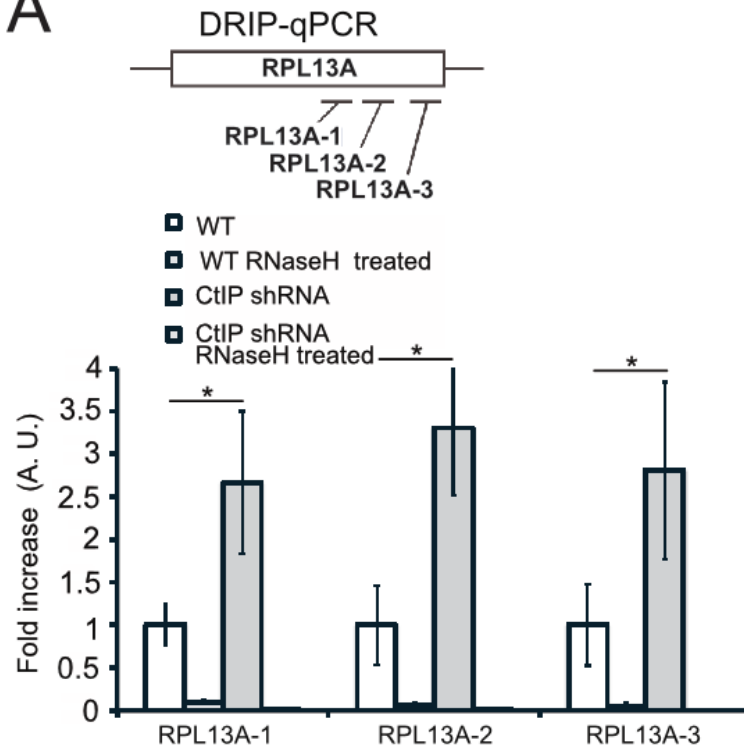**B**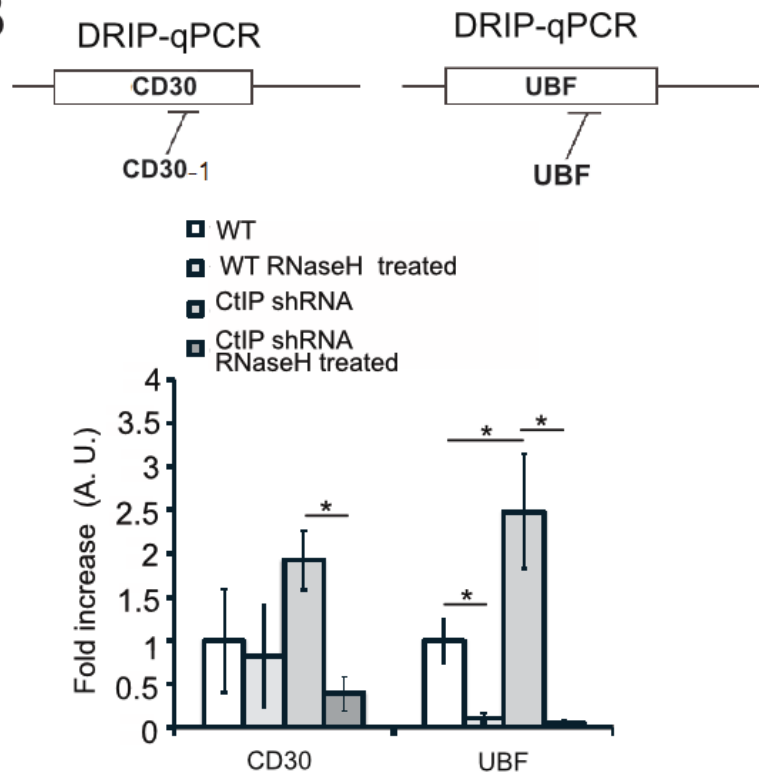

Supplement: supp [file elife-42733-supp-v1.zip]
